# Supplementary material for: Intramolecular axial α/β-coordination of the 132-terminal pyridyl group to the central zinc atom in chlorophyll-a derivatives
Source: Royal Society of Chemistry journal article supplement (doi:10.1039/d2ob00903j), 2022-01-01
Supplement: d2ob00903j1.pdf [file d2ob00903j1.pdf]

## Electronic Supplementary Information

# Intramolecular axial $\alpha/\beta$ -coordination of the $^{13}\text{C}$ -terminal pyridyl group to the central zinc atom in chlorophyll-*a* derivatives

Kagari Oyagi, Shin Ogasawara,\* and Hitoshi Tamiaki\*

*Graduate School of Life Sciences, Ritsumeikan University, Kusatsu, Shiga 525-8577,  
Japan*

Corresponding authors' E-mail: o-shin@fc.ritsumei.ac.jp, tamiaki@fc.ritsumei.ac.jp

### Table of contents

|                                                                                                                                                                                                                                                                     |         |
|---------------------------------------------------------------------------------------------------------------------------------------------------------------------------------------------------------------------------------------------------------------------|---------|
| Optimized molecular configuration images of <b>Zn-4</b> ( $\text{C}_{1,3}$ , $\text{C}_{2,2}$ , or $\text{C}_{3,1}$ ) and <b>Zn-4'</b> ( $\text{C}_{1,3}$ , $\text{C}_{2,2}$ , or $\text{C}_{3,1}$ ) with their Cartesian coordinates ( <b>Tables S1–S6</b> ) ..... | S2–S31  |
| $^1\text{H}$ NMR signals of the $^{13}\text{C}$ -pyridine terminal in <b>Zn-4</b> ( $\text{C}_{3,1}$ ) and <b>Zn-4'</b> ( $\text{C}_{3,1}$ ) with(out) pyridine- $d_5$ ( <b>Tables S7–S8</b> ).....                                                                 | S32     |
| $^1\text{H}$ NMR spectra of <b>H<sub>2</sub>-2/2'</b> ( $\text{C}_1$ or $\text{C}_3$ ), <b>H<sub>2</sub>-3/3'</b> ( $\text{C}_1$ or $\text{C}_3$ ), and <b>H<sub>2</sub>-4/4'</b> ( $\text{C}_{1,3}$ or $\text{C}_{3,1}$ ) ( <b>Figures S1–S6</b> ).....            | S33–S38 |
| $^1\text{H}$ and $^{13}\text{C}$ NMR spectra of <b>Zn-4</b> ( $\text{C}_{1,3}$ , $\text{C}_{2,2}$ , or $\text{C}_{3,1}$ ) and <b>Zn-4'</b> ( $\text{C}_{1,3}$ , $\text{C}_{2,2}$ , or $\text{C}_{3,1}$ ) ( <b>Figures S7–S18</b> ).....                             | S39–S50 |
| Visible absorption, fluorescence emission, and CD spectra of <b>Zn-4</b> ( $\text{C}_{1,3}$ or $\text{C}_{2,2}$ ) and <b>Zn-4'</b> ( $\text{C}_{1,3}$ or $\text{C}_{2,2}$ ) ( <b>Figures S19–S20</b> ).....                                                         | S51–S52 |

**Table S1.** Optimized molecular configuration image and its Cartesian coordinates of **Zn-4(C<sub>1,3</sub>)** (MM+/PM3).<sup>a</sup>

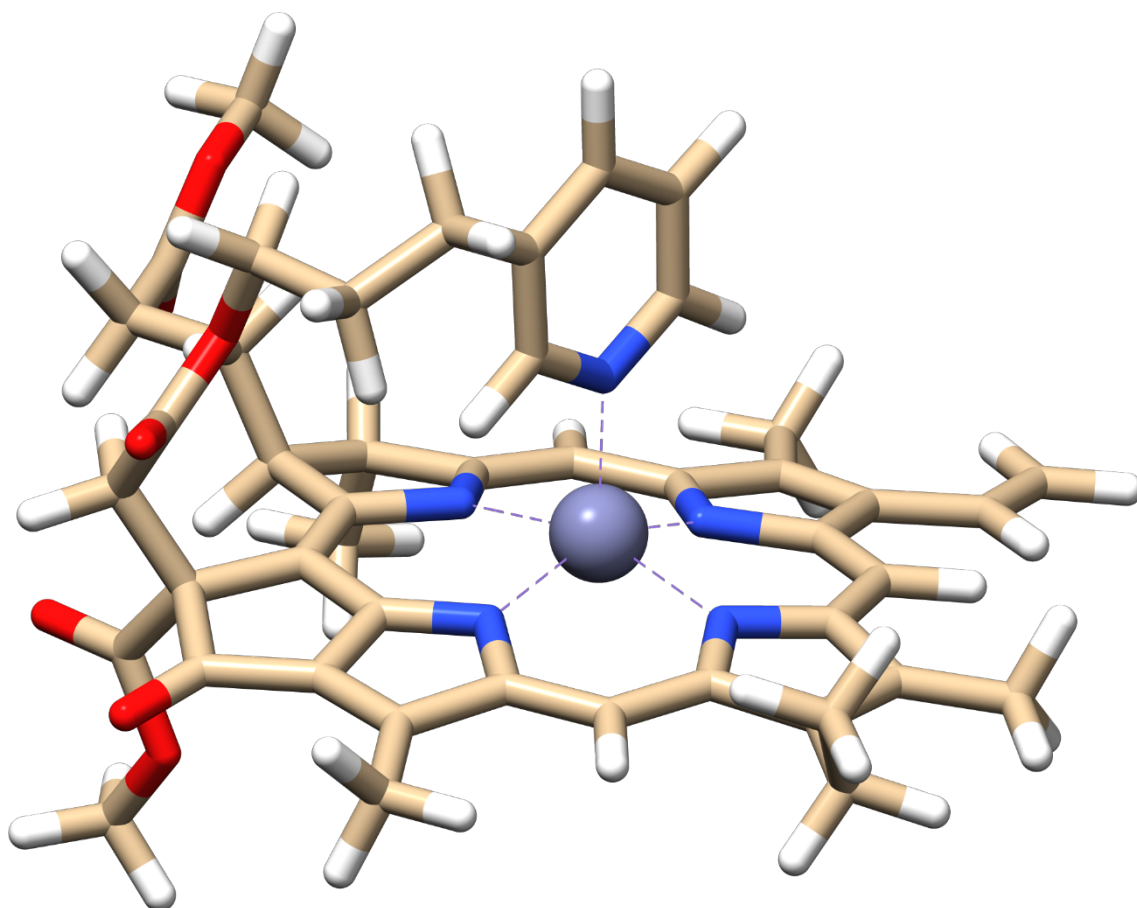


---

| 106116 0 0 0 0 0 0 0 0999 V2000 |         |          |   |   |   |   |   |   |   |   |   |   |   |   |   |   |
|---------------------------------|---------|----------|---|---|---|---|---|---|---|---|---|---|---|---|---|---|
| 68.7684                         | 14.5479 | -18.5888 | C | 0 | 0 | 0 | 0 | 0 | 0 | 0 | 0 | 0 | 0 | 0 | 0 | 0 |
| 70.2270                         | 14.1715 | -18.4590 | C | 0 | 0 | 0 | 0 | 0 | 0 | 0 | 0 | 0 | 0 | 0 | 0 | 0 |
| 71.0524                         | 15.2480 | -18.2655 | O | 0 | 0 | 0 | 0 | 0 | 0 | 0 | 0 | 0 | 0 | 0 | 0 | 0 |
| 70.7229                         | 13.0649 | -18.5331 | O | 0 | 0 | 0 | 0 | 0 | 0 | 0 | 0 | 0 | 0 | 0 | 0 | 0 |
| 68.6810                         | 15.3417 | -19.3581 | H | 0 | 0 | 0 | 0 | 0 | 0 | 0 | 0 | 0 | 0 | 0 | 0 | 0 |
| 68.2009                         | 13.6795 | -18.9842 | H | 0 | 0 | 0 | 0 | 0 | 0 | 0 | 0 | 0 | 0 | 0 | 0 | 0 |
| 72.4354                         | 15.0208 | -18.1077 | C | 0 | 0 | 0 | 0 | 0 | 0 | 0 | 0 | 0 | 0 | 0 | 0 | 0 |
| 72.8776                         | 14.5598 | -18.9974 | H | 0 | 0 | 0 | 0 | 0 | 0 | 0 | 0 | 0 | 0 | 0 | 0 | 0 |
| 72.6474                         | 14.4036 | -17.2280 | H | 0 | 0 | 0 | 0 | 0 | 0 | 0 | 0 | 0 | 0 | 0 | 0 | 0 |
| 69.1304                         | 13.9544 | -11.7186 | C | 0 | 0 | 0 | 0 | 0 | 0 | 0 | 0 | 0 | 0 | 0 | 0 | 0 |
| 68.0057                         | 14.5281 | -11.2012 | N | 0 | 0 | 0 | 0 | 0 | 0 | 0 | 0 | 0 | 0 | 0 | 0 | 0 |
| 68.1759                         | 14.6267 | -9.7785  | C | 0 | 0 | 0 | 0 | 0 | 0 | 0 | 0 | 0 | 0 | 0 | 0 | 0 |
| 69.5235                         | 14.1043 | -9.4545  | C | 0 | 0 | 0 | 0 | 0 | 0 | 0 | 0 | 0 | 0 | 0 | 0 | 0 |
| 67.2574                         | 15.0523 | -8.8766  | C | 0 | 0 | 0 | 0 | 0 | 0 | 0 | 0 | 0 | 0 | 0 | 0 | 0 |
| 65.9076                         | 15.4149 | -9.1725  | C | 0 | 0 | 0 | 0 | 0 | 0 | 0 | 0 | 0 | 0 | 0 | 0 | 0 |
| 65.3461                         | 15.4529 | -10.4221 | N | 0 | 0 | 0 | 0 | 0 | 0 | 0 | 0 | 0 | 0 | 0 | 0 | 0 |
| 63.9608                         | 15.6901 | -10.2734 | C | 0 | 0 | 0 | 0 | 0 | 0 | 0 | 0 | 0 | 0 | 0 | 0 | 0 |

|         |         |             |   |   |   |   |   |   |   |   |   |   |   |
|---------|---------|-------------|---|---|---|---|---|---|---|---|---|---|---|
| 63.6925 | 15.8692 | -8.8625 C   | 0 | 0 | 0 | 0 | 0 | 0 | 0 | 0 | 0 | 0 | 0 |
| 64.8879 | 15.6939 | -8.1856 C   | 0 | 0 | 0 | 0 | 0 | 0 | 0 | 0 | 0 | 0 | 0 |
| 63.0068 | 15.6377 | -11.2914 C  | 0 | 0 | 0 | 0 | 0 | 0 | 0 | 0 | 0 | 0 | 0 |
| 63.2733 | 15.3596 | -12.6186 C  | 0 | 0 | 0 | 0 | 0 | 0 | 0 | 0 | 0 | 0 | 0 |
| 64.5914 | 15.1349 | -13.1422 N  | 0 | 0 | 0 | 0 | 0 | 0 | 0 | 0 | 0 | 0 | 0 |
| 64.4473 | 14.8992 | -14.4564 C  | 0 | 0 | 0 | 0 | 0 | 0 | 0 | 0 | 0 | 0 | 0 |
| 63.0506 | 14.9298 | -14.8397 C  | 0 | 0 | 0 | 0 | 0 | 0 | 0 | 0 | 0 | 0 | 0 |
| 62.3128 | 15.2144 | -13.7091 C  | 0 | 0 | 0 | 0 | 0 | 0 | 0 | 0 | 0 | 0 | 0 |
| 65.3292 | 14.5951 | -15.5523 C  | 0 | 0 | 0 | 0 | 0 | 0 | 0 | 0 | 0 | 0 | 0 |
| 66.6570 | 14.3718 | -15.3596 C  | 0 | 0 | 0 | 0 | 0 | 0 | 0 | 0 | 0 | 0 | 0 |
| 67.2571 | 14.4405 | -14.0610 N  | 0 | 0 | 0 | 0 | 0 | 0 | 0 | 0 | 0 | 0 | 0 |
| 68.4843 | 13.8299 | -14.1086 C  | 0 | 0 | 0 | 0 | 0 | 0 | 0 | 0 | 0 | 0 | 0 |
| 68.8215 | 13.3349 | -15.5043 C  | 0 | 0 | 0 | 0 | 0 | 0 | 0 | 0 | 0 | 0 | 0 |
| 67.6752 | 13.8988 | -16.3804 C  | 0 | 0 | 0 | 0 | 0 | 0 | 0 | 0 | 0 | 0 | 0 |
| 69.3689 | 13.6394 | -13.0614 C  | 0 | 0 | 0 | 0 | 0 | 0 | 0 | 0 | 0 | 0 | 0 |
| 69.9945 | 14.0869 | -8.0897 C   | 0 | 0 | 0 | 0 | 0 | 0 | 0 | 0 | 0 | 0 | 0 |
| 67.5596 | 15.0666 | -7.8135 H   | 0 | 0 | 0 | 0 | 0 | 0 | 0 | 0 | 0 | 0 | 0 |
| 62.3834 | 16.1501 | -8.2315 C   | 0 | 0 | 0 | 0 | 0 | 0 | 0 | 0 | 0 | 0 | 0 |
| 61.9522 | 15.8060 | -11.0131 H  | 0 | 0 | 0 | 0 | 0 | 0 | 0 | 0 | 0 | 0 | 0 |
| 62.9506 | 14.6152 | -16.2601 C  | 0 | 0 | 0 | 0 | 0 | 0 | 0 | 0 | 0 | 0 | 0 |
| 60.8568 | 15.3481 | -13.5792 C  | 0 | 0 | 0 | 0 | 0 | 0 | 0 | 0 | 0 | 0 | 0 |
| 64.4402 | 14.4660 | -16.7885 C  | 0 | 0 | 0 | 0 | 0 | 0 | 0 | 0 | 0 | 0 | 0 |
| 69.8095 | 13.7521 | -15.8173 H  | 0 | 0 | 0 | 0 | 0 | 0 | 0 | 0 | 0 | 0 | 0 |
| 67.2268 | 13.0914 | -17.0108 H  | 0 | 0 | 0 | 0 | 0 | 0 | 0 | 0 | 0 | 0 | 0 |
| 70.3387 | 13.1570 | -13.2723 H  | 0 | 0 | 0 | 0 | 0 | 0 | 0 | 0 | 0 | 0 | 0 |
| 70.0935 | 13.6835 | -10.6257 C  | 0 | 0 | 0 | 0 | 0 | 0 | 0 | 0 | 0 | 0 | 0 |
| 61.9061 | 17.5623 | -8.4991 C   | 0 | 0 | 0 | 0 | 0 | 0 | 0 | 0 | 0 | 0 | 0 |
| 68.8927 | 11.8206 | -15.5688 C  | 0 | 0 | 0 | 0 | 0 | 0 | 0 | 0 | 0 | 0 | 0 |
| 62.4899 | 15.9858 | -7.1340 H   | 0 | 0 | 0 | 0 | 0 | 0 | 0 | 0 | 0 | 0 | 0 |
| 61.6333 | 15.4156 | -8.5852 H   | 0 | 0 | 0 | 0 | 0 | 0 | 0 | 0 | 0 | 0 | 0 |
| 61.9682 | 14.4696 | -16.9483 O  | 0 | 0 | 0 | 0 | 0 | 0 | 0 | 0 | 0 | 0 | 0 |
| 60.5657 | 15.6218 | -12.5543 H  | 0 | 0 | 0 | 0 | 0 | 0 | 0 | 0 | 0 | 0 | 0 |
| 60.3555 | 14.4040 | -13.8336 H  | 0 | 0 | 0 | 0 | 0 | 0 | 0 | 0 | 0 | 0 | 0 |
| 60.4708 | 16.1181 | -14.2612 H  | 0 | 0 | 0 | 0 | 0 | 0 | 0 | 0 | 0 | 0 | 0 |
| 64.6146 | 13.0722 | -17.4097 C  | 0 | 0 | 0 | 0 | 0 | 0 | 0 | 0 | 0 | 0 | 0 |
| 61.7581 | 17.7442 | -9.5721 H   | 0 | 0 | 0 | 0 | 0 | 0 | 0 | 0 | 0 | 0 | 0 |
| 62.6262 | 18.3078 | -8.1383 H   | 0 | 0 | 0 | 0 | 0 | 0 | 0 | 0 | 0 | 0 | 0 |
| 60.9498 | 17.7566 | -7.9968 H   | 0 | 0 | 0 | 0 | 0 | 0 | 0 | 0 | 0 | 0 | 0 |
| 71.4013 | 13.0582 | -10.8717 C  | 0 | 0 | 0 | 0 | 0 | 0 | 0 | 0 | 0 | 0 | 0 |
| 71.5127 | 12.1258 | -10.3008 H  | 0 | 0 | 0 | 0 | 0 | 0 | 0 | 0 | 0 | 0 | 0 |
| 71.5171 | 12.8153 | -11.9423 H  | 0 | 0 | 0 | 0 | 0 | 0 | 0 | 0 | 0 | 0 | 0 |
| 68.1563 | 15.0369 | -17.2819 C  | 0 | 0 | 0 | 0 | 0 | 0 | 0 | 0 | 0 | 0 | 0 |
| 68.8648 | 15.6944 | -16.7397 H  | 0 | 0 | 0 | 0 | 0 | 0 | 0 | 0 | 0 | 0 | 0 |
| 67.2892 | 15.6875 | -17.5311 H  | 0 | 0 | 0 | 0 | 0 | 0 | 0 | 0 | 0 | 0 | 0 |
| 67.9368 | 11.3502 | -15.3030 H  | 0 | 0 | 0 | 0 | 0 | 0 | 0 | 0 | 0 | 0 | 0 |
| 69.6536 | 11.4327 | -14.8782 H  | 0 | 0 | 0 | 0 | 0 | 0 | 0 | 0 | 0 | 0 | 0 |
| 69.1577 | 11.4854 | -16.5807 H  | 0 | 0 | 0 | 0 | 0 | 0 | 0 | 0 | 0 | 0 | 0 |
| 69.2464 | 14.4529 | -7.3634 H   | 0 | 0 | 0 | 0 | 0 | 0 | 0 | 0 | 0 | 0 | 0 |
| 71.1961 | 13.6835 | -7.6813 C   | 0 | 0 | 0 | 0 | 0 | 0 | 0 | 0 | 0 | 0 | 0 |
| 66.4397 | 15.3116 | -12.2416 Zn | 0 | 0 | 0 | 0 | 0 | 0 | 0 | 0 | 0 | 0 | 0 |
| 72.2256 | 13.7272 | -10.5877 H  | 0 | 0 | 0 | 0 | 0 | 0 | 0 | 0 | 0 | 0 | 0 |
| 71.9709 | 13.3137 | -8.3474 H   | 0 | 0 | 0 | 0 | 0 | 0 | 0 | 0 | 0 | 0 | 0 |
| 71.4815 | 13.6978 | -6.6337 H   | 0 | 0 | 0 | 0 | 0 | 0 | 0 | 0 | 0 | 0 | 0 |
| 65.0744 | 15.7522 | -6.7272 C   | 0 | 0 | 0 | 0 | 0 | 0 | 0 | 0 | 0 | 0 | 0 |

|         |         |          |   |   |   |   |   |   |   |   |   |   |   |   |
|---------|---------|----------|---|---|---|---|---|---|---|---|---|---|---|---|
| 72.8263 | 16.0317 | -17.9679 | H | 0 | 0 | 0 | 0 | 0 | 0 | 0 | 0 | 0 | 0 | 0 |
| 65.7020 | 16.6053 | -6.4381  | H | 0 | 0 | 0 | 0 | 0 | 0 | 0 | 0 | 0 | 0 | 0 |
| 64.0961 | 15.8619 | -6.2286  | H | 0 | 0 | 0 | 0 | 0 | 0 | 0 | 0 | 0 | 0 | 0 |
| 65.5522 | 14.8404 | -6.3452  | H | 0 | 0 | 0 | 0 | 0 | 0 | 0 | 0 | 0 | 0 | 0 |
| 66.9528 | 17.3249 | -12.6082 | N | 0 | 0 | 0 | 0 | 0 | 0 | 0 | 0 | 0 | 0 | 0 |
| 64.1267 | 12.0586 | -16.6418 | O | 0 | 0 | 0 | 0 | 0 | 0 | 0 | 0 | 0 | 0 | 0 |
| 64.2155 | 10.7353 | -17.1275 | C | 0 | 0 | 0 | 0 | 0 | 0 | 0 | 0 | 0 | 0 | 0 |
| 65.1330 | 12.8018 | -18.4774 | O | 0 | 0 | 0 | 0 | 0 | 0 | 0 | 0 | 0 | 0 | 0 |
| 63.6756 | 10.6078 | -18.0718 | H | 0 | 0 | 0 | 0 | 0 | 0 | 0 | 0 | 0 | 0 | 0 |
| 63.7330 | 10.1652 | -16.3296 | H | 0 | 0 | 0 | 0 | 0 | 0 | 0 | 0 | 0 | 0 | 0 |
| 65.2574 | 10.4198 | -17.2492 | H | 0 | 0 | 0 | 0 | 0 | 0 | 0 | 0 | 0 | 0 | 0 |
| 66.1658 | 18.0827 | -13.4176 | C | 0 | 0 | 0 | 0 | 0 | 0 | 0 | 0 | 0 | 0 | 0 |
| 68.0921 | 17.8638 | -12.0940 | C | 0 | 0 | 0 | 0 | 0 | 0 | 0 | 0 | 0 | 0 | 0 |
| 66.4953 | 19.4034 | -13.7490 | C | 0 | 0 | 0 | 0 | 0 | 0 | 0 | 0 | 0 | 0 | 0 |
| 68.4693 | 19.1747 | -12.3906 | C | 0 | 0 | 0 | 0 | 0 | 0 | 0 | 0 | 0 | 0 | 0 |
| 67.6707 | 19.9490 | -13.2256 | C | 0 | 0 | 0 | 0 | 0 | 0 | 0 | 0 | 0 | 0 | 0 |
| 67.9583 | 20.9787 | -13.4684 | H | 0 | 0 | 0 | 0 | 0 | 0 | 0 | 0 | 0 | 0 | 0 |
| 69.3914 | 19.5844 | -11.9648 | H | 0 | 0 | 0 | 0 | 0 | 0 | 0 | 0 | 0 | 0 | 0 |
| 68.6944 | 17.2165 | -11.4387 | H | 0 | 0 | 0 | 0 | 0 | 0 | 0 | 0 | 0 | 0 | 0 |
| 65.2464 | 17.6189 | -13.8281 | H | 0 | 0 | 0 | 0 | 0 | 0 | 0 | 0 | 0 | 0 | 0 |
| 65.5954 | 20.2336 | -14.6058 | C | 0 | 0 | 0 | 0 | 0 | 0 | 0 | 0 | 0 | 0 | 0 |
| 64.7211 | 19.4418 | -15.5680 | C | 0 | 0 | 0 | 0 | 0 | 0 | 0 | 0 | 0 | 0 | 0 |
| 65.4524 | 19.0484 | -16.8550 | C | 0 | 0 | 0 | 0 | 0 | 0 | 0 | 0 | 0 | 0 | 0 |
| 66.1964 | 20.9823 | -15.1622 | H | 0 | 0 | 0 | 0 | 0 | 0 | 0 | 0 | 0 | 0 | 0 |
| 64.9476 | 20.8209 | -13.9220 | H | 0 | 0 | 0 | 0 | 0 | 0 | 0 | 0 | 0 | 0 | 0 |
| 65.5322 | 17.6472 | -17.0755 | O | 0 | 0 | 0 | 0 | 0 | 0 | 0 | 0 | 0 | 0 | 0 |
| 64.4179 | 16.9566 | -17.4794 | C | 0 | 0 | 0 | 0 | 0 | 0 | 0 | 0 | 0 | 0 | 0 |
| 64.7068 | 15.5212 | -17.8704 | C | 0 | 0 | 0 | 0 | 0 | 0 | 0 | 0 | 0 | 0 | 0 |
| 64.0758 | 15.2889 | -18.7553 | H | 0 | 0 | 0 | 0 | 0 | 0 | 0 | 0 | 0 | 0 | 0 |
| 65.7611 | 15.4324 | -18.2179 | H | 0 | 0 | 0 | 0 | 0 | 0 | 0 | 0 | 0 | 0 | 0 |
| 63.8323 | 20.0498 | -15.8286 | H | 0 | 0 | 0 | 0 | 0 | 0 | 0 | 0 | 0 | 0 | 0 |
| 64.3156 | 18.5409 | -15.0526 | H | 0 | 0 | 0 | 0 | 0 | 0 | 0 | 0 | 0 | 0 | 0 |
| 66.5282 | 19.2994 | -16.8250 | H | 0 | 0 | 0 | 0 | 0 | 0 | 0 | 0 | 0 | 0 | 0 |
| 65.0073 | 19.5485 | -17.7352 | H | 0 | 0 | 0 | 0 | 0 | 0 | 0 | 0 | 0 | 0 | 0 |
| 63.3599 | 17.5458 | -17.5470 | O | 0 | 0 | 0 | 0 | 0 | 0 | 0 | 0 | 0 | 0 | 0 |
| 1       | 2       | 1        | 0 | 0 | 0 | 0 |   |   |   |   |   |   |   |   |
| 1       | 5       | 1        | 0 | 0 | 0 | 0 |   |   |   |   |   |   |   |   |
| 1       | 6       | 1        | 0 | 0 | 0 | 0 |   |   |   |   |   |   |   |   |
| 1       | 59      | 1        | 0 | 0 | 0 | 0 |   |   |   |   |   |   |   |   |
| 2       | 3       | 1        | 0 | 0 | 0 | 0 |   |   |   |   |   |   |   |   |
| 2       | 4       | 2        | 0 | 0 | 0 | 0 |   |   |   |   |   |   |   |   |
| 3       | 7       | 1        | 0 | 0 | 0 | 0 |   |   |   |   |   |   |   |   |
| 7       | 8       | 1        | 0 | 0 | 0 | 0 |   |   |   |   |   |   |   |   |
| 7       | 9       | 1        | 0 | 0 | 0 | 0 |   |   |   |   |   |   |   |   |
| 7       | 72      | 1        | 0 | 0 | 0 | 0 |   |   |   |   |   |   |   |   |
| 10      | 11      | 1        | 0 | 0 | 0 | 0 |   |   |   |   |   |   |   |   |
| 10      | 32      | 1        | 0 | 0 | 0 | 0 |   |   |   |   |   |   |   |   |
| 10      | 43      | 2        | 0 | 0 | 0 | 0 |   |   |   |   |   |   |   |   |
| 11      | 12      | 1        | 0 | 0 | 0 | 0 |   |   |   |   |   |   |   |   |
| 11      | 67      | 1        | 0 | 0 | 0 | 0 |   |   |   |   |   |   |   |   |
| 12      | 13      | 2        | 0 | 0 | 0 | 0 |   |   |   |   |   |   |   |   |
| 12      | 14      | 1        | 0 | 0 | 0 | 0 |   |   |   |   |   |   |   |   |
| 13      | 33      | 1        | 0 | 0 | 0 | 0 |   |   |   |   |   |   |   |   |
| 13      | 43      | 1        | 0 | 0 | 0 | 0 |   |   |   |   |   |   |   |   |

|       |   |   |   |   |   |
|-------|---|---|---|---|---|
| 14 15 | 2 | 0 | 0 | 0 | 0 |
| 14 34 | 1 | 0 | 0 | 0 | 0 |
| 15 16 | 1 | 0 | 0 | 0 | 0 |
| 15 19 | 1 | 0 | 0 | 0 | 0 |
| 16 17 | 2 | 0 | 0 | 0 | 0 |
| 16 67 | 1 | 0 | 0 | 0 | 0 |
| 17 18 | 1 | 0 | 0 | 0 | 0 |
| 17 20 | 1 | 0 | 0 | 0 | 0 |
| 18 19 | 2 | 0 | 0 | 0 | 0 |
| 18 35 | 1 | 0 | 0 | 0 | 0 |
| 19 71 | 1 | 0 | 0 | 0 | 0 |
| 20 21 | 2 | 0 | 0 | 0 | 0 |
| 20 36 | 1 | 0 | 0 | 0 | 0 |
| 21 22 | 1 | 0 | 0 | 0 | 0 |
| 21 25 | 1 | 0 | 0 | 0 | 0 |
| 22 23 | 1 | 0 | 0 | 0 | 0 |
| 22 67 | 1 | 0 | 0 | 0 | 0 |
| 23 24 | 1 | 0 | 0 | 0 | 0 |
| 23 26 | 2 | 0 | 0 | 0 | 0 |
| 24 25 | 2 | 0 | 0 | 0 | 0 |
| 24 37 | 1 | 0 | 0 | 0 | 0 |
| 25 38 | 1 | 0 | 0 | 0 | 0 |
| 26 27 | 1 | 0 | 0 | 0 | 0 |
| 26 39 | 1 | 0 | 0 | 0 | 0 |
| 27 28 | 2 | 0 | 0 | 0 | 0 |
| 27 31 | 1 | 0 | 0 | 0 | 0 |
| 28 29 | 1 | 0 | 0 | 0 | 0 |
| 28 67 | 1 | 0 | 0 | 0 | 0 |
| 29 30 | 1 | 0 | 0 | 0 | 0 |
| 29 32 | 2 | 0 | 0 | 0 | 0 |
| 30 31 | 1 | 0 | 0 | 0 | 0 |
| 30 40 | 1 | 0 | 0 | 0 | 0 |
| 30 45 | 1 | 0 | 0 | 0 | 0 |
| 31 41 | 1 | 0 | 0 | 0 | 0 |
| 31 59 | 1 | 0 | 0 | 0 | 0 |
| 32 42 | 1 | 0 | 0 | 0 | 0 |
| 33 65 | 1 | 0 | 0 | 0 | 0 |
| 33 66 | 2 | 0 | 0 | 0 | 0 |
| 35 44 | 1 | 0 | 0 | 0 | 0 |
| 35 46 | 1 | 0 | 0 | 0 | 0 |
| 35 47 | 1 | 0 | 0 | 0 | 0 |
| 37 39 | 1 | 0 | 0 | 0 | 0 |
| 37 48 | 2 | 0 | 0 | 0 | 0 |
| 38 49 | 1 | 0 | 0 | 0 | 0 |
| 38 50 | 1 | 0 | 0 | 0 | 0 |
| 38 51 | 1 | 0 | 0 | 0 | 0 |
| 39 52 | 1 | 0 | 0 | 0 | 0 |
| 39 99 | 1 | 0 | 0 | 0 | 0 |
| 43 56 | 1 | 0 | 0 | 0 | 0 |
| 44 53 | 1 | 0 | 0 | 0 | 0 |
| 44 54 | 1 | 0 | 0 | 0 | 0 |
| 44 55 | 1 | 0 | 0 | 0 | 0 |
| 45 62 | 1 | 0 | 0 | 0 | 0 |
| 45 63 | 1 | 0 | 0 | 0 | 0 |

```
45 64 1 0 0 0 0
52 77 1 0 0 0 0
52 79 2 0 0 0 0
56 57 1 0 0 0 0
56 58 1 0 0 0 0
56 68 1 0 0 0 0
59 60 1 0 0 0 0
59 61 1 0 0 0 0
66 69 1 0 0 0 0
66 70 1 0 0 0 0
67 76 1 0 0 0 0
71 73 1 0 0 0 0
71 74 1 0 0 0 0
71 75 1 0 0 0 0
76 83 2 0 0 0 0
76 84 1 0 0 0 0
77 78 1 0 0 0 0
78 80 1 0 0 0 0
78 81 1 0 0 0 0
78 82 1 0 0 0 0
83 85 1 0 0 0 0
83 91 1 0 0 0 0
84 86 2 0 0 0 0
84 90 1 0 0 0 0
85 87 2 0 0 0 0
85 92 1 0 0 0 0
86 87 1 0 0 0 0
86 89 1 0 0 0 0
87 88 1 0 0 0 0
92 93 1 0 0 0 0
92 95 1 0 0 0 0
92 96 1 0 0 0 0
93 94 1 0 0 0 0
93102 1 0 0 0 0
93103 1 0 0 0 0
94 97 1 0 0 0 0
94104 1 0 0 0 0
94105 1 0 0 0 0
97 98 1 0 0 0 0
98 99 1 0 0 0 0
98106 2 0 0 0 0
99100 1 0 0 0 0
99101 1 0 0 0 0
```

M END

---

<sup>a</sup> The MM+/PM3 calculations were performed until the RMS gradient reached a value below 0.01 kcal Å<sup>-1</sup> mol<sup>-1</sup> by using Polak-Ribiere algorithm.

**Table S2.** Optimized molecular configuration image and its Cartesian coordinates of **Zn-4'(C<sub>1,3</sub>) (MM+/PM3).**<sup>a</sup>

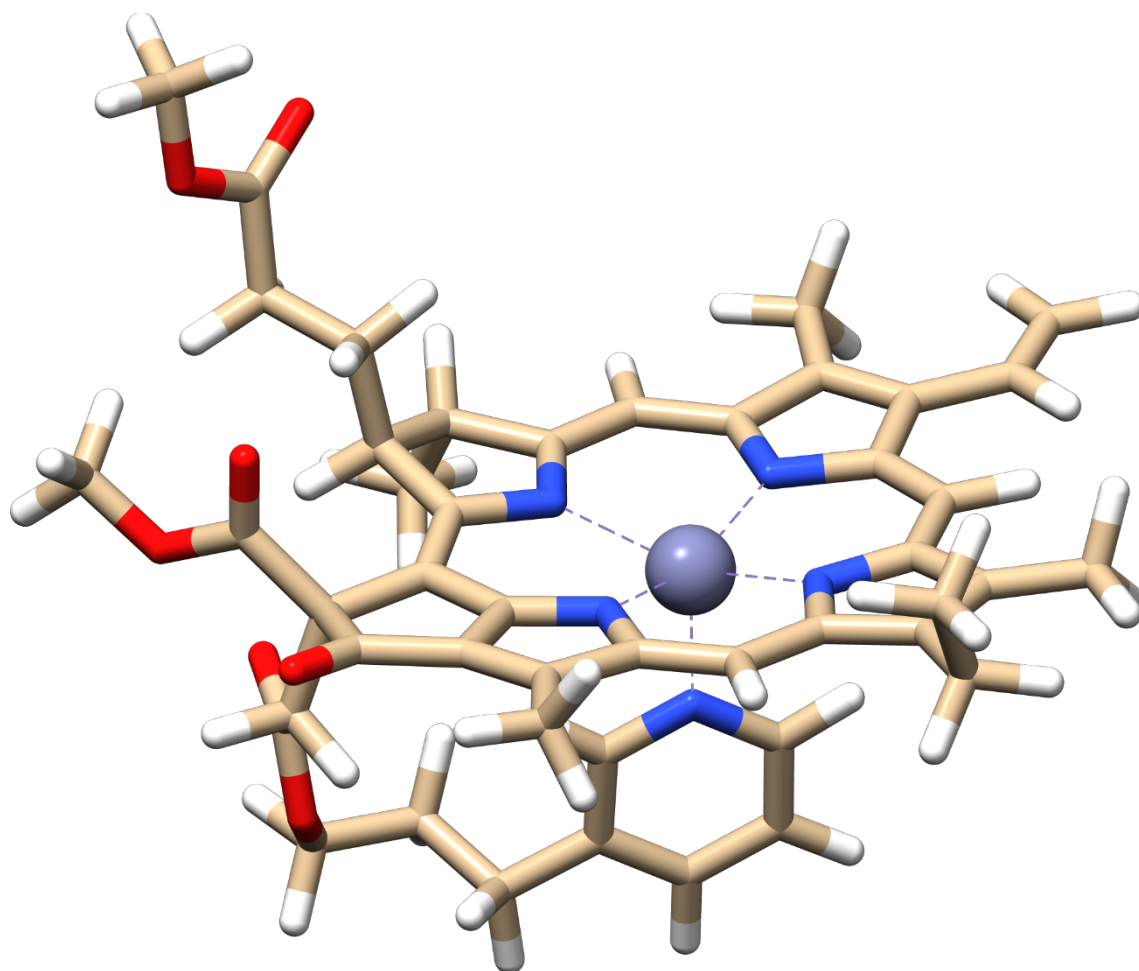


---

| 106116 0 0 0 0 0 0 0 0999 V2000 |         |          |   |   |   |   |   |   |   |   |   |   |   |   |
|---------------------------------|---------|----------|---|---|---|---|---|---|---|---|---|---|---|---|
| 69.8654                         | 15.5572 | -16.5716 | C | 0 | 0 | 0 | 0 | 0 | 0 | 0 | 0 | 0 | 0 | 0 |
| 71.1757                         | 16.0229 | -15.9785 | C | 0 | 0 | 0 | 0 | 0 | 0 | 0 | 0 | 0 | 0 | 0 |
| 71.7060                         | 17.1043 | -16.6251 | O | 0 | 0 | 0 | 0 | 0 | 0 | 0 | 0 | 0 | 0 | 0 |
| 71.7810                         | 15.5438 | -15.0395 | O | 0 | 0 | 0 | 0 | 0 | 0 | 0 | 0 | 0 | 0 | 0 |
| 69.7527                         | 15.9247 | -17.6187 | H | 0 | 0 | 0 | 0 | 0 | 0 | 0 | 0 | 0 | 0 | 0 |
| 69.8766                         | 14.4502 | -16.6338 | H | 0 | 0 | 0 | 0 | 0 | 0 | 0 | 0 | 0 | 0 | 0 |
| 72.8905                         | 17.6837 | -16.1244 | C | 0 | 0 | 0 | 0 | 0 | 0 | 0 | 0 | 0 | 0 | 0 |
| 73.7359                         | 16.9896 | -16.1788 | H | 0 | 0 | 0 | 0 | 0 | 0 | 0 | 0 | 0 | 0 | 0 |
| 72.7691                         | 18.0373 | -15.0949 | H | 0 | 0 | 0 | 0 | 0 | 0 | 0 | 0 | 0 | 0 | 0 |
| 65.5122                         | 13.6005 | -12.0358 | C | 0 | 0 | 0 | 0 | 0 | 0 | 0 | 0 | 0 | 0 | 0 |
| 64.6817                         | 14.6460 | -11.7888 | N | 0 | 0 | 0 | 0 | 0 | 0 | 0 | 0 | 0 | 0 | 0 |
| 64.1558                         | 14.4919 | -10.4607 | C | 0 | 0 | 0 | 0 | 0 | 0 | 0 | 0 | 0 | 0 | 0 |
| 64.7168                         | 13.2393 | -9.9069  | C | 0 | 0 | 0 | 0 | 0 | 0 | 0 | 0 | 0 | 0 | 0 |
| 63.3311                         | 15.3505 | -9.8110  | C | 0 | 0 | 0 | 0 | 0 | 0 | 0 | 0 | 0 | 0 | 0 |
| 62.8620                         | 16.6005 | -10.3163 | C | 0 | 0 | 0 | 0 | 0 | 0 | 0 | 0 | 0 | 0 | 0 |

|         |         |             |   |   |   |   |   |   |   |   |   |   |   |
|---------|---------|-------------|---|---|---|---|---|---|---|---|---|---|---|
| 63.1236 | 17.1145 | -11.5641 N  | 0 | 0 | 0 | 0 | 0 | 0 | 0 | 0 | 0 | 0 | 0 |
| 62.5704 | 18.4082 | -11.6302 C  | 0 | 0 | 0 | 0 | 0 | 0 | 0 | 0 | 0 | 0 | 0 |
| 61.9153 | 18.6759 | -10.3699 C  | 0 | 0 | 0 | 0 | 0 | 0 | 0 | 0 | 0 | 0 | 0 |
| 62.0921 | 17.5623 | -9.5632 C   | 0 | 0 | 0 | 0 | 0 | 0 | 0 | 0 | 0 | 0 | 0 |
| 62.6929 | 19.3064 | -12.6991 C  | 0 | 0 | 0 | 0 | 0 | 0 | 0 | 0 | 0 | 0 | 0 |
| 63.4021 | 19.0720 | -13.8569 C  | 0 | 0 | 0 | 0 | 0 | 0 | 0 | 0 | 0 | 0 | 0 |
| 64.0797 | 17.8352 | -14.1416 N  | 0 | 0 | 0 | 0 | 0 | 0 | 0 | 0 | 0 | 0 | 0 |
| 64.6981 | 17.9934 | -15.3215 C  | 0 | 0 | 0 | 0 | 0 | 0 | 0 | 0 | 0 | 0 | 0 |
| 64.4538 | 19.3209 | -15.8578 C  | 0 | 0 | 0 | 0 | 0 | 0 | 0 | 0 | 0 | 0 | 0 |
| 63.6563 | 19.9973 | -14.9614 C  | 0 | 0 | 0 | 0 | 0 | 0 | 0 | 0 | 0 | 0 | 0 |
| 65.6051 | 17.2185 | -16.1256 C  | 0 | 0 | 0 | 0 | 0 | 0 | 0 | 0 | 0 | 0 | 0 |
| 66.1851 | 16.0896 | -15.6164 C  | 0 | 0 | 0 | 0 | 0 | 0 | 0 | 0 | 0 | 0 | 0 |
| 65.6856 | 15.4496 | -14.4484 N  | 0 | 0 | 0 | 0 | 0 | 0 | 0 | 0 | 0 | 0 | 0 |
| 66.3507 | 14.2464 | -14.2766 C  | 0 | 0 | 0 | 0 | 0 | 0 | 0 | 0 | 0 | 0 | 0 |
| 67.2902 | 13.9609 | -15.4350 C  | 0 | 0 | 0 | 0 | 0 | 0 | 0 | 0 | 0 | 0 | 0 |
| 67.3949 | 15.3364 | -16.1399 C  | 0 | 0 | 0 | 0 | 0 | 0 | 0 | 0 | 0 | 0 | 0 |
| 66.2586 | 13.3829 | -13.2110 C  | 0 | 0 | 0 | 0 | 0 | 0 | 0 | 0 | 0 | 0 | 0 |
| 64.3654 | 12.8048 | -8.5758 C   | 0 | 0 | 0 | 0 | 0 | 0 | 0 | 0 | 0 | 0 | 0 |
| 63.0226 | 15.0754 | -8.7855 H   | 0 | 0 | 0 | 0 | 0 | 0 | 0 | 0 | 0 | 0 | 0 |
| 61.1784 | 19.9005 | -9.9853 C   | 0 | 0 | 0 | 0 | 0 | 0 | 0 | 0 | 0 | 0 | 0 |
| 62.2042 | 20.2874 | -12.5881 H  | 0 | 0 | 0 | 0 | 0 | 0 | 0 | 0 | 0 | 0 | 0 |
| 65.1675 | 19.4437 | -17.1210 C  | 0 | 0 | 0 | 0 | 0 | 0 | 0 | 0 | 0 | 0 | 0 |
| 63.1475 | 21.3720 | -15.0503 C  | 0 | 0 | 0 | 0 | 0 | 0 | 0 | 0 | 0 | 0 | 0 |
| 65.7594 | 17.9892 | -17.4364 C  | 0 | 0 | 0 | 0 | 0 | 0 | 0 | 0 | 0 | 0 | 0 |
| 68.2834 | 13.6306 | -15.0441 H  | 0 | 0 | 0 | 0 | 0 | 0 | 0 | 0 | 0 | 0 | 0 |
| 67.3586 | 15.2356 | -17.2503 H  | 0 | 0 | 0 | 0 | 0 | 0 | 0 | 0 | 0 | 0 | 0 |
| 66.8462 | 12.4490 | -13.2298 H  | 0 | 0 | 0 | 0 | 0 | 0 | 0 | 0 | 0 | 0 | 0 |
| 65.5429 | 12.7034 | -10.8597 C  | 0 | 0 | 0 | 0 | 0 | 0 | 0 | 0 | 0 | 0 | 0 |
| 62.1062 | 21.0552 | -9.6678 C   | 0 | 0 | 0 | 0 | 0 | 0 | 0 | 0 | 0 | 0 | 0 |
| 66.7504 | 12.8792 | -16.3503 C  | 0 | 0 | 0 | 0 | 0 | 0 | 0 | 0 | 0 | 0 | 0 |
| 60.5584 | 19.6574 | -9.0913 H   | 0 | 0 | 0 | 0 | 0 | 0 | 0 | 0 | 0 | 0 | 0 |
| 60.4718 | 20.1824 | -10.7902 H  | 0 | 0 | 0 | 0 | 0 | 0 | 0 | 0 | 0 | 0 | 0 |
| 65.2892 | 20.4033 | -17.8472 O  | 0 | 0 | 0 | 0 | 0 | 0 | 0 | 0 | 0 | 0 | 0 |
| 62.0487 | 21.3798 | -15.0666 H  | 0 | 0 | 0 | 0 | 0 | 0 | 0 | 0 | 0 | 0 | 0 |
| 63.5033 | 21.8801 | -15.9557 H  | 0 | 0 | 0 | 0 | 0 | 0 | 0 | 0 | 0 | 0 | 0 |
| 63.4692 | 21.9636 | -14.1818 H  | 0 | 0 | 0 | 0 | 0 | 0 | 0 | 0 | 0 | 0 | 0 |
| 64.8044 | 17.4707 | -18.5316 C  | 0 | 0 | 0 | 0 | 0 | 0 | 0 | 0 | 0 | 0 | 0 |
| 67.2017 | 18.1720 | -17.8930 C  | 0 | 0 | 0 | 0 | 0 | 0 | 0 | 0 | 0 | 0 | 0 |
| 62.7112 | 21.3427 | -10.5384 H  | 0 | 0 | 0 | 0 | 0 | 0 | 0 | 0 | 0 | 0 | 0 |
| 62.8020 | 20.8027 | -8.8573 H   | 0 | 0 | 0 | 0 | 0 | 0 | 0 | 0 | 0 | 0 | 0 |
| 61.5394 | 21.9408 | -9.3533 H   | 0 | 0 | 0 | 0 | 0 | 0 | 0 | 0 | 0 | 0 | 0 |
| 66.3574 | 11.4796 | -10.8293 C  | 0 | 0 | 0 | 0 | 0 | 0 | 0 | 0 | 0 | 0 | 0 |
| 65.7342 | 10.5865 | -10.6817 H  | 0 | 0 | 0 | 0 | 0 | 0 | 0 | 0 | 0 | 0 | 0 |
| 66.9038 | 11.3573 | -11.7806 H  | 0 | 0 | 0 | 0 | 0 | 0 | 0 | 0 | 0 | 0 | 0 |
| 68.6950 | 16.0349 | -15.7219 C  | 0 | 0 | 0 | 0 | 0 | 0 | 0 | 0 | 0 | 0 | 0 |
| 68.9016 | 15.8499 | -14.6474 H  | 0 | 0 | 0 | 0 | 0 | 0 | 0 | 0 | 0 | 0 | 0 |
| 68.5869 | 17.1340 | -15.8097 H  | 0 | 0 | 0 | 0 | 0 | 0 | 0 | 0 | 0 | 0 | 0 |
| 65.7873 | 13.1587 | -16.8010 H  | 0 | 0 | 0 | 0 | 0 | 0 | 0 | 0 | 0 | 0 | 0 |
| 66.6008 | 11.9394 | -15.8025 H  | 0 | 0 | 0 | 0 | 0 | 0 | 0 | 0 | 0 | 0 | 0 |
| 67.4500 | 12.6817 | -17.1733 H  | 0 | 0 | 0 | 0 | 0 | 0 | 0 | 0 | 0 | 0 | 0 |
| 63.6857 | 13.5012 | -8.0525 H   | 0 | 0 | 0 | 0 | 0 | 0 | 0 | 0 | 0 | 0 | 0 |
| 64.7827 | 11.6883 | -7.9817 C   | 0 | 0 | 0 | 0 | 0 | 0 | 0 | 0 | 0 | 0 | 0 |
| 64.0524 | 16.0416 | -13.1404 Zn | 0 | 0 | 0 | 0 | 0 | 0 | 0 | 0 | 0 | 0 | 0 |
| 67.0974 | 11.5114 | -10.0175 H  | 0 | 0 | 0 | 0 | 0 | 0 | 0 | 0 | 0 | 0 | 0 |



|         |         |          |   |   |   |   |   |   |   |   |   |   |   |   |
|---------|---------|----------|---|---|---|---|---|---|---|---|---|---|---|---|
| 65.4492 | 10.9666 | -8.4462  | H | 0 | 0 | 0 | 0 | 0 | 0 | 0 | 0 | 0 | 0 | 0 |
| 64.4745 | 11.4236 | -6.9746  | H | 0 | 0 | 0 | 0 | 0 | 0 | 0 | 0 | 0 | 0 | 0 |
| 61.5802 | 17.3972 | -8.1936  | C | 0 | 0 | 0 | 0 | 0 | 0 | 0 | 0 | 0 | 0 | 0 |
| 73.0447 | 18.5275 | -16.8017 | H | 0 | 0 | 0 | 0 | 0 | 0 | 0 | 0 | 0 | 0 | 0 |
| 61.0302 | 16.4540 | -8.0787  | H | 0 | 0 | 0 | 0 | 0 | 0 | 0 | 0 | 0 | 0 | 0 |
| 62.3963 | 17.4005 | -7.4591  | H | 0 | 0 | 0 | 0 | 0 | 0 | 0 | 0 | 0 | 0 | 0 |
| 60.8960 | 18.2274 | -7.9480  | H | 0 | 0 | 0 | 0 | 0 | 0 | 0 | 0 | 0 | 0 | 0 |
| 68.0583 | 18.8404 | -17.3490 | O | 0 | 0 | 0 | 0 | 0 | 0 | 0 | 0 | 0 | 0 | 0 |
| 67.5186 | 17.5507 | -19.0693 | O | 0 | 0 | 0 | 0 | 0 | 0 | 0 | 0 | 0 | 0 | 0 |
| 68.8460 | 17.6245 | -19.5413 | C | 0 | 0 | 0 | 0 | 0 | 0 | 0 | 0 | 0 | 0 | 0 |
| 69.5324 | 17.0928 | -18.8646 | H | 0 | 0 | 0 | 0 | 0 | 0 | 0 | 0 | 0 | 0 | 0 |
| 68.7806 | 17.1068 | -20.5015 | H | 0 | 0 | 0 | 0 | 0 | 0 | 0 | 0 | 0 | 0 | 0 |
| 65.0165 | 18.0050 | -19.4825 | H | 0 | 0 | 0 | 0 | 0 | 0 | 0 | 0 | 0 | 0 | 0 |
| 69.1855 | 18.6560 | -19.6833 | H | 0 | 0 | 0 | 0 | 0 | 0 | 0 | 0 | 0 | 0 | 0 |
| 63.7743 | 17.7772 | -18.2396 | H | 0 | 0 | 0 | 0 | 0 | 0 | 0 | 0 | 0 | 0 | 0 |
| 64.7682 | 15.9962 | -18.8594 | C | 0 | 0 | 0 | 0 | 0 | 0 | 0 | 0 | 0 | 0 | 0 |
| 63.5175 | 15.6364 | -19.3038 | O | 0 | 0 | 0 | 0 | 0 | 0 | 0 | 0 | 0 | 0 | 0 |
| 63.1869 | 14.2699 | -19.4997 | C | 0 | 0 | 0 | 0 | 0 | 0 | 0 | 0 | 0 | 0 | 0 |
| 62.7652 | 13.5888 | -18.1984 | C | 0 | 0 | 0 | 0 | 0 | 0 | 0 | 0 | 0 | 0 | 0 |
| 61.4837 | 14.1858 | -17.6206 | C | 0 | 0 | 0 | 0 | 0 | 0 | 0 | 0 | 0 | 0 | 0 |
| 60.6035 | 13.6282 | -17.9990 | H | 0 | 0 | 0 | 0 | 0 | 0 | 0 | 0 | 0 | 0 | 0 |
| 61.3434 | 15.2293 | -17.9722 | H | 0 | 0 | 0 | 0 | 0 | 0 | 0 | 0 | 0 | 0 | 0 |
| 61.4835 | 14.2044 | -16.1279 | C | 0 | 0 | 0 | 0 | 0 | 0 | 0 | 0 | 0 | 0 | 0 |
| 60.5264 | 13.5045 | -15.3910 | C | 0 | 0 | 0 | 0 | 0 | 0 | 0 | 0 | 0 | 0 | 0 |
| 60.5486 | 13.5777 | -14.0008 | C | 0 | 0 | 0 | 0 | 0 | 0 | 0 | 0 | 0 | 0 | 0 |
| 61.5311 | 14.3376 | -13.3650 | C | 0 | 0 | 0 | 0 | 0 | 0 | 0 | 0 | 0 | 0 | 0 |
| 62.4432 | 14.9604 | -15.4398 | C | 0 | 0 | 0 | 0 | 0 | 0 | 0 | 0 | 0 | 0 | 0 |
| 62.4690 | 15.0169 | -14.0818 | N | 0 | 0 | 0 | 0 | 0 | 0 | 0 | 0 | 0 | 0 | 0 |
| 63.2166 | 15.5398 | -15.9744 | H | 0 | 0 | 0 | 0 | 0 | 0 | 0 | 0 | 0 | 0 | 0 |
| 61.5906 | 14.4206 | -12.2686 | H | 0 | 0 | 0 | 0 | 0 | 0 | 0 | 0 | 0 | 0 | 0 |
| 59.8025 | 13.0425 | -13.4030 | H | 0 | 0 | 0 | 0 | 0 | 0 | 0 | 0 | 0 | 0 | 0 |
| 59.7613 | 12.9067 | -15.9012 | H | 0 | 0 | 0 | 0 | 0 | 0 | 0 | 0 | 0 | 0 | 0 |
| 62.6224 | 12.5087 | -18.3957 | H | 0 | 0 | 0 | 0 | 0 | 0 | 0 | 0 | 0 | 0 | 0 |
| 63.5963 | 13.6457 | -17.4638 | H | 0 | 0 | 0 | 0 | 0 | 0 | 0 | 0 | 0 | 0 | 0 |
| 62.3469 | 14.3579 | -20.2118 | H | 0 | 0 | 0 | 0 | 0 | 0 | 0 | 0 | 0 | 0 | 0 |
| 64.0047 | 13.7115 | -19.9928 | H | 0 | 0 | 0 | 0 | 0 | 0 | 0 | 0 | 0 | 0 | 0 |
| 65.6395 | 15.1530 | -18.8455 | O | 0 | 0 | 0 | 0 | 0 | 0 | 0 | 0 | 0 | 0 | 0 |
| 1       | 2       | 1        | 0 | 0 | 0 | 0 |   |   |   |   |   |   |   |   |
| 1       | 5       | 1        | 0 | 0 | 0 | 0 |   |   |   |   |   |   |   |   |
| 1       | 6       | 1        | 0 | 0 | 0 | 0 |   |   |   |   |   |   |   |   |
| 1       | 60      | 1        | 0 | 0 | 0 | 0 |   |   |   |   |   |   |   |   |
| 2       | 3       | 1        | 0 | 0 | 0 | 0 |   |   |   |   |   |   |   |   |
| 2       | 4       | 2        | 0 | 0 | 0 | 0 |   |   |   |   |   |   |   |   |
| 3       | 7       | 1        | 0 | 0 | 0 | 0 |   |   |   |   |   |   |   |   |
| 7       | 8       | 1        | 0 | 0 | 0 | 0 |   |   |   |   |   |   |   |   |
| 7       | 9       | 1        | 0 | 0 | 0 | 0 |   |   |   |   |   |   |   |   |
| 7       | 73      | 1        | 0 | 0 | 0 | 0 |   |   |   |   |   |   |   |   |
| 10      | 11      | 1        | 0 | 0 | 0 | 0 |   |   |   |   |   |   |   |   |
| 10      | 32      | 1        | 0 | 0 | 0 | 0 |   |   |   |   |   |   |   |   |
| 10      | 43      | 2        | 0 | 0 | 0 | 0 |   |   |   |   |   |   |   |   |
| 11      | 12      | 1        | 0 | 0 | 0 | 0 |   |   |   |   |   |   |   |   |
| 11      | 68      | 1        | 0 | 0 | 0 | 0 |   |   |   |   |   |   |   |   |
| 12      | 13      | 2        | 0 | 0 | 0 | 0 |   |   |   |   |   |   |   |   |
| 12      | 14      | 1        | 0 | 0 | 0 | 0 |   |   |   |   |   |   |   |   |

|       |   |   |   |   |   |
|-------|---|---|---|---|---|
| 13 33 | 1 | 0 | 0 | 0 | 0 |
| 13 43 | 1 | 0 | 0 | 0 | 0 |
| 14 15 | 2 | 0 | 0 | 0 | 0 |
| 14 34 | 1 | 0 | 0 | 0 | 0 |
| 15 16 | 1 | 0 | 0 | 0 | 0 |
| 15 19 | 1 | 0 | 0 | 0 | 0 |
| 16 17 | 2 | 0 | 0 | 0 | 0 |
| 16 68 | 1 | 0 | 0 | 0 | 0 |
| 17 18 | 1 | 0 | 0 | 0 | 0 |
| 17 20 | 1 | 0 | 0 | 0 | 0 |
| 18 19 | 2 | 0 | 0 | 0 | 0 |
| 18 35 | 1 | 0 | 0 | 0 | 0 |
| 19 72 | 1 | 0 | 0 | 0 | 0 |
| 20 21 | 2 | 0 | 0 | 0 | 0 |
| 20 36 | 1 | 0 | 0 | 0 | 0 |
| 21 22 | 1 | 0 | 0 | 0 | 0 |
| 21 25 | 1 | 0 | 0 | 0 | 0 |
| 22 23 | 1 | 0 | 0 | 0 | 0 |
| 22 68 | 1 | 0 | 0 | 0 | 0 |
| 23 24 | 1 | 0 | 0 | 0 | 0 |
| 23 26 | 2 | 0 | 0 | 0 | 0 |
| 24 25 | 2 | 0 | 0 | 0 | 0 |
| 24 37 | 1 | 0 | 0 | 0 | 0 |
| 25 38 | 1 | 0 | 0 | 0 | 0 |
| 26 27 | 1 | 0 | 0 | 0 | 0 |
| 26 39 | 1 | 0 | 0 | 0 | 0 |
| 27 28 | 2 | 0 | 0 | 0 | 0 |
| 27 31 | 1 | 0 | 0 | 0 | 0 |
| 28 29 | 1 | 0 | 0 | 0 | 0 |
| 28 68 | 1 | 0 | 0 | 0 | 0 |
| 29 30 | 1 | 0 | 0 | 0 | 0 |
| 29 32 | 2 | 0 | 0 | 0 | 0 |
| 30 31 | 1 | 0 | 0 | 0 | 0 |
| 30 40 | 1 | 0 | 0 | 0 | 0 |
| 30 45 | 1 | 0 | 0 | 0 | 0 |
| 31 41 | 1 | 0 | 0 | 0 | 0 |
| 31 60 | 1 | 0 | 0 | 0 | 0 |
| 32 42 | 1 | 0 | 0 | 0 | 0 |
| 33 66 | 1 | 0 | 0 | 0 | 0 |
| 33 67 | 2 | 0 | 0 | 0 | 0 |
| 35 44 | 1 | 0 | 0 | 0 | 0 |
| 35 46 | 1 | 0 | 0 | 0 | 0 |
| 35 47 | 1 | 0 | 0 | 0 | 0 |
| 37 39 | 1 | 0 | 0 | 0 | 0 |
| 37 48 | 2 | 0 | 0 | 0 | 0 |
| 38 49 | 1 | 0 | 0 | 0 | 0 |
| 38 50 | 1 | 0 | 0 | 0 | 0 |
| 38 51 | 1 | 0 | 0 | 0 | 0 |
| 39 52 | 1 | 0 | 0 | 0 | 0 |
| 39 53 | 1 | 0 | 0 | 0 | 0 |
| 43 57 | 1 | 0 | 0 | 0 | 0 |
| 44 54 | 1 | 0 | 0 | 0 | 0 |
| 44 55 | 1 | 0 | 0 | 0 | 0 |
| 44 56 | 1 | 0 | 0 | 0 | 0 |

```
45 63 1 0 0 0 0
45 64 1 0 0 0 0
45 65 1 0 0 0 0
52 82 1 0 0 0 0
52 84 1 0 0 0 0
52 85 1 0 0 0 0
53 77 2 0 0 0 0
53 78 1 0 0 0 0
57 58 1 0 0 0 0
57 59 1 0 0 0 0
57 69 1 0 0 0 0
60 61 1 0 0 0 0
60 62 1 0 0 0 0
67 70 1 0 0 0 0
67 71 1 0 0 0 0
68 97 1 0 0 0 0
72 74 1 0 0 0 0
72 75 1 0 0 0 0
72 76 1 0 0 0 0
78 79 1 0 0 0 0
79 80 1 0 0 0 0
79 81 1 0 0 0 0
79 83 1 0 0 0 0
85 86 1 0 0 0 0
85106 2 0 0 0 0
86 87 1 0 0 0 0
87 88 1 0 0 0 0
87104 1 0 0 0 0
87105 1 0 0 0 0
88 89 1 0 0 0 0
88102 1 0 0 0 0
88103 1 0 0 0 0
89 90 1 0 0 0 0
89 91 1 0 0 0 0
89 92 1 0 0 0 0
92 93 1 0 0 0 0
92 96 2 0 0 0 0
93 94 2 0 0 0 0
93101 1 0 0 0 0
94 95 1 0 0 0 0
94100 1 0 0 0 0
95 97 2 0 0 0 0
95 99 1 0 0 0 0
96 97 1 0 0 0 0
96 98 1 0 0 0 0
```

M END

---

<sup>a</sup> The MM+/PM3 calculations were performed until the RMS gradient reached a value below 0.01 kcal Å<sup>-1</sup> mol<sup>-1</sup> by using Polak-Ribiere algorithm.

**Table S3.** Optimized molecular configuration image and its Cartesian coordinates of **Zn-4(C<sub>2</sub>,<sub>2</sub>)** (MM+/PM3).<sup>a</sup>

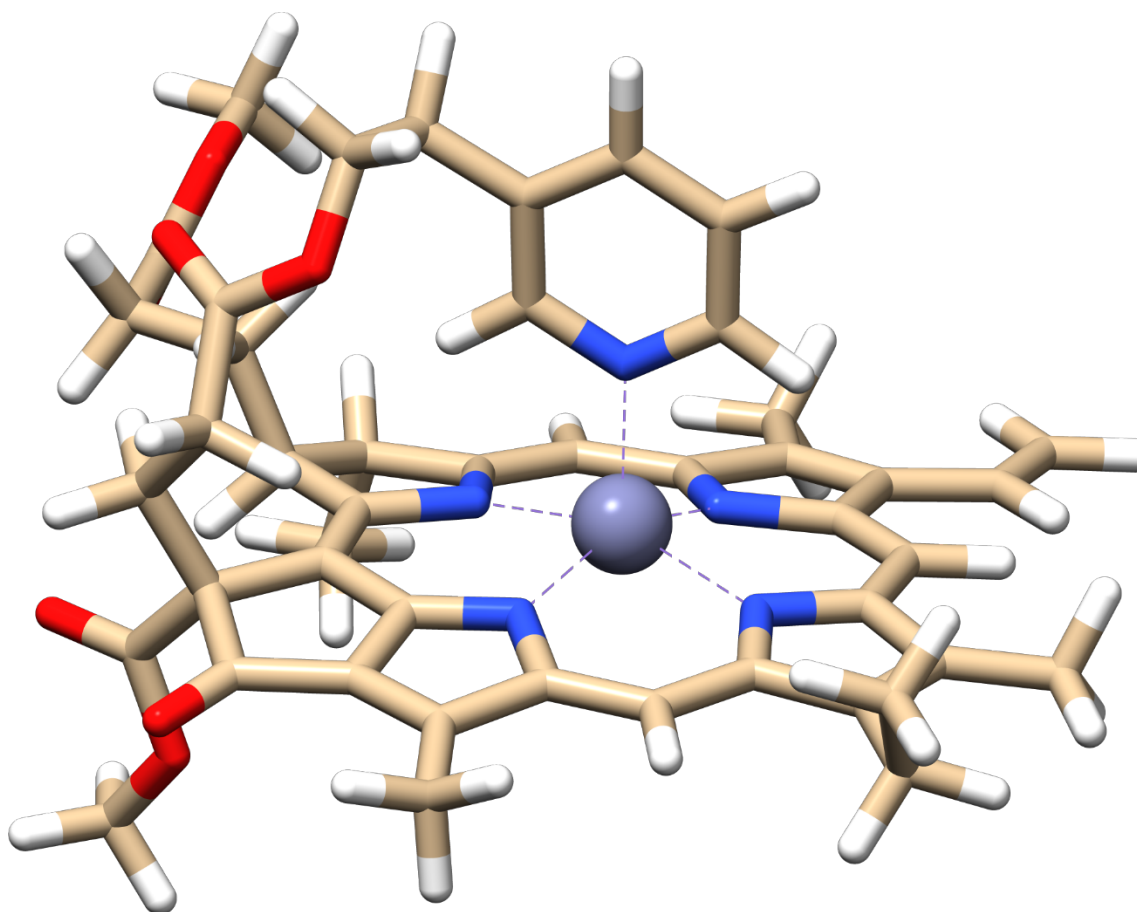

| 106116 0 0 0 0 0 0 0 0999 V2000 |         |          |   |   |   |   |   |   |   |   |   |   |   |   |
|---------------------------------|---------|----------|---|---|---|---|---|---|---|---|---|---|---|---|
| 68.6322                         | 14.7863 | -18.5311 | C | 0 | 0 | 0 | 0 | 0 | 0 | 0 | 0 | 0 | 0 | 0 |
| 70.1026                         | 14.4618 | -18.3972 | C | 0 | 0 | 0 | 0 | 0 | 0 | 0 | 0 | 0 | 0 | 0 |
| 70.8778                         | 15.5499 | -18.0926 | O | 0 | 0 | 0 | 0 | 0 | 0 | 0 | 0 | 0 | 0 | 0 |
| 70.6476                         | 13.3870 | -18.5535 | O | 0 | 0 | 0 | 0 | 0 | 0 | 0 | 0 | 0 | 0 | 0 |
| 68.5242                         | 15.6164 | -19.2590 | H | 0 | 0 | 0 | 0 | 0 | 0 | 0 | 0 | 0 | 0 | 0 |
| 68.1060                         | 13.9186 | -18.9809 | H | 0 | 0 | 0 | 0 | 0 | 0 | 0 | 0 | 0 | 0 | 0 |
| 72.2659                         | 15.3660 | -17.9234 | C | 0 | 0 | 0 | 0 | 0 | 0 | 0 | 0 | 0 | 0 | 0 |
| 72.7444                         | 15.0000 | -18.8382 | H | 0 | 0 | 0 | 0 | 0 | 0 | 0 | 0 | 0 | 0 | 0 |
| 72.4863                         | 14.6857 | -17.0937 | H | 0 | 0 | 0 | 0 | 0 | 0 | 0 | 0 | 0 | 0 | 0 |
| 69.0846                         | 14.1006 | -11.7226 | C | 0 | 0 | 0 | 0 | 0 | 0 | 0 | 0 | 0 | 0 | 0 |
| 67.9426                         | 14.6185 | -11.1910 | N | 0 | 0 | 0 | 0 | 0 | 0 | 0 | 0 | 0 | 0 | 0 |
| 68.1292                         | 14.7329 | -9.7710  | C | 0 | 0 | 0 | 0 | 0 | 0 | 0 | 0 | 0 | 0 | 0 |
| 69.5115                         | 14.2962 | -9.4685  | C | 0 | 0 | 0 | 0 | 0 | 0 | 0 | 0 | 0 | 0 | 0 |
| 67.1987                         | 15.0964 | -8.8545  | C | 0 | 0 | 0 | 0 | 0 | 0 | 0 | 0 | 0 | 0 | 0 |
| 65.8228                         | 15.3660 | -9.1264  | C | 0 | 0 | 0 | 0 | 0 | 0 | 0 | 0 | 0 | 0 | 0 |
| 65.2340                         | 15.3485 | -10.3672 | N | 0 | 0 | 0 | 0 | 0 | 0 | 0 | 0 | 0 | 0 | 0 |
| 63.8440                         | 15.5099 | -10.1947 | C | 0 | 0 | 0 | 0 | 0 | 0 | 0 | 0 | 0 | 0 | 0 |

|         |         |             |   |   |   |   |   |   |   |   |   |   |   |
|---------|---------|-------------|---|---|---|---|---|---|---|---|---|---|---|
| 63.5894 | 15.6822 | -8.7823 C   | 0 | 0 | 0 | 0 | 0 | 0 | 0 | 0 | 0 | 0 | 0 |
| 64.8065 | 15.5892 | -8.1249 C   | 0 | 0 | 0 | 0 | 0 | 0 | 0 | 0 | 0 | 0 | 0 |
| 62.8732 | 15.4143 | -11.1996 C  | 0 | 0 | 0 | 0 | 0 | 0 | 0 | 0 | 0 | 0 | 0 |
| 63.1305 | 15.1700 | -12.5321 C  | 0 | 0 | 0 | 0 | 0 | 0 | 0 | 0 | 0 | 0 | 0 |
| 64.4555 | 15.0438 | -13.0781 N  | 0 | 0 | 0 | 0 | 0 | 0 | 0 | 0 | 0 | 0 | 0 |
| 64.3103 | 14.7934 | -14.3873 C  | 0 | 0 | 0 | 0 | 0 | 0 | 0 | 0 | 0 | 0 | 0 |
| 62.9077 | 14.7363 | -14.7542 C  | 0 | 0 | 0 | 0 | 0 | 0 | 0 | 0 | 0 | 0 | 0 |
| 62.1671 | 14.9650 | -13.6146 C  | 0 | 0 | 0 | 0 | 0 | 0 | 0 | 0 | 0 | 0 | 0 |
| 65.1934 | 14.5454 | -15.4961 C  | 0 | 0 | 0 | 0 | 0 | 0 | 0 | 0 | 0 | 0 | 0 |
| 66.5315 | 14.3731 | -15.3168 C  | 0 | 0 | 0 | 0 | 0 | 0 | 0 | 0 | 0 | 0 | 0 |
| 67.1369 | 14.4389 | -14.0230 N  | 0 | 0 | 0 | 0 | 0 | 0 | 0 | 0 | 0 | 0 | 0 |
| 68.4036 | 13.9074 | -14.0973 C  | 0 | 0 | 0 | 0 | 0 | 0 | 0 | 0 | 0 | 0 | 0 |
| 68.7445 | 13.4517 | -15.5050 C  | 0 | 0 | 0 | 0 | 0 | 0 | 0 | 0 | 0 | 0 | 0 |
| 67.5651 | 13.9835 | -16.3573 C  | 0 | 0 | 0 | 0 | 0 | 0 | 0 | 0 | 0 | 0 | 0 |
| 69.3142 | 13.7760 | -13.0685 C  | 0 | 0 | 0 | 0 | 0 | 0 | 0 | 0 | 0 | 0 | 0 |
| 70.0084 | 14.3197 | -8.1131 C   | 0 | 0 | 0 | 0 | 0 | 0 | 0 | 0 | 0 | 0 | 0 |
| 67.5175 | 15.1324 | -7.7967 H   | 0 | 0 | 0 | 0 | 0 | 0 | 0 | 0 | 0 | 0 | 0 |
| 62.2774 | 15.8874 | -8.1285 C   | 0 | 0 | 0 | 0 | 0 | 0 | 0 | 0 | 0 | 0 | 0 |
| 61.8219 | 15.5201 | -10.8876 H  | 0 | 0 | 0 | 0 | 0 | 0 | 0 | 0 | 0 | 0 | 0 |
| 62.8147 | 14.4379 | -16.1802 C  | 0 | 0 | 0 | 0 | 0 | 0 | 0 | 0 | 0 | 0 | 0 |
| 60.7053 | 14.9836 | -13.4769 C  | 0 | 0 | 0 | 0 | 0 | 0 | 0 | 0 | 0 | 0 | 0 |
| 64.3003 | 14.4108 | -16.7299 C  | 0 | 0 | 0 | 0 | 0 | 0 | 0 | 0 | 0 | 0 | 0 |
| 69.7102 | 13.9153 | -15.8226 H  | 0 | 0 | 0 | 0 | 0 | 0 | 0 | 0 | 0 | 0 | 0 |
| 67.1570 | 13.1776 | -17.0157 H  | 0 | 0 | 0 | 0 | 0 | 0 | 0 | 0 | 0 | 0 | 0 |
| 70.3059 | 13.3466 | -13.2915 H  | 0 | 0 | 0 | 0 | 0 | 0 | 0 | 0 | 0 | 0 | 0 |
| 70.0827 | 13.8975 | -10.6471 C  | 0 | 0 | 0 | 0 | 0 | 0 | 0 | 0 | 0 | 0 | 0 |
| 61.7145 | 17.2696 | -8.3867 C   | 0 | 0 | 0 | 0 | 0 | 0 | 0 | 0 | 0 | 0 | 0 |
| 68.8781 | 11.9432 | -15.5965 C  | 0 | 0 | 0 | 0 | 0 | 0 | 0 | 0 | 0 | 0 | 0 |
| 62.4127 | 15.7305 | -7.0331 H   | 0 | 0 | 0 | 0 | 0 | 0 | 0 | 0 | 0 | 0 | 0 |
| 61.5645 | 15.1106 | -8.4686 H   | 0 | 0 | 0 | 0 | 0 | 0 | 0 | 0 | 0 | 0 | 0 |
| 61.8293 | 14.2589 | -16.8589 O  | 0 | 0 | 0 | 0 | 0 | 0 | 0 | 0 | 0 | 0 | 0 |
| 60.3748 | 15.7121 | -12.7242 H  | 0 | 0 | 0 | 0 | 0 | 0 | 0 | 0 | 0 | 0 | 0 |
| 60.3421 | 13.9939 | -13.1643 H  | 0 | 0 | 0 | 0 | 0 | 0 | 0 | 0 | 0 | 0 | 0 |
| 60.2144 | 15.2299 | -14.4276 H  | 0 | 0 | 0 | 0 | 0 | 0 | 0 | 0 | 0 | 0 | 0 |
| 64.5621 | 13.0769 | -17.4363 C  | 0 | 0 | 0 | 0 | 0 | 0 | 0 | 0 | 0 | 0 | 0 |
| 61.5384 | 17.4431 | -9.4569 H   | 0 | 0 | 0 | 0 | 0 | 0 | 0 | 0 | 0 | 0 | 0 |
| 62.3960 | 18.0556 | -8.0370 H   | 0 | 0 | 0 | 0 | 0 | 0 | 0 | 0 | 0 | 0 | 0 |
| 60.7571 | 17.4081 | -7.8684 H   | 0 | 0 | 0 | 0 | 0 | 0 | 0 | 0 | 0 | 0 | 0 |
| 71.4204 | 13.3480 | -10.9127 C  | 0 | 0 | 0 | 0 | 0 | 0 | 0 | 0 | 0 | 0 | 0 |
| 71.6015 | 12.4349 | -10.3288 H  | 0 | 0 | 0 | 0 | 0 | 0 | 0 | 0 | 0 | 0 | 0 |
| 71.5274 | 13.0933 | -11.9815 H  | 0 | 0 | 0 | 0 | 0 | 0 | 0 | 0 | 0 | 0 | 0 |
| 67.9779 | 15.1820 | -17.2143 C  | 0 | 0 | 0 | 0 | 0 | 0 | 0 | 0 | 0 | 0 | 0 |
| 68.6335 | 15.8676 | -16.6400 H  | 0 | 0 | 0 | 0 | 0 | 0 | 0 | 0 | 0 | 0 | 0 |
| 67.0711 | 15.7817 | -17.4524 H  | 0 | 0 | 0 | 0 | 0 | 0 | 0 | 0 | 0 | 0 | 0 |
| 67.9449 | 11.4287 | -15.3317 H  | 0 | 0 | 0 | 0 | 0 | 0 | 0 | 0 | 0 | 0 | 0 |
| 69.6605 | 11.5766 | -14.9184 H  | 0 | 0 | 0 | 0 | 0 | 0 | 0 | 0 | 0 | 0 | 0 |
| 69.1483 | 11.6366 | -16.6160 H  | 0 | 0 | 0 | 0 | 0 | 0 | 0 | 0 | 0 | 0 | 0 |
| 69.2508 | 14.6372 | -7.3741 H   | 0 | 0 | 0 | 0 | 0 | 0 | 0 | 0 | 0 | 0 | 0 |
| 71.2432 | 14.0043 | -7.7266 C   | 0 | 0 | 0 | 0 | 0 | 0 | 0 | 0 | 0 | 0 | 0 |
| 66.3084 | 15.2891 | -12.2054 Zn | 0 | 0 | 0 | 0 | 0 | 0 | 0 | 0 | 0 | 0 | 0 |
| 72.2081 | 14.0713 | -10.6594 H  | 0 | 0 | 0 | 0 | 0 | 0 | 0 | 0 | 0 | 0 | 0 |
| 72.0291 | 13.6867 | -8.4064 H   | 0 | 0 | 0 | 0 | 0 | 0 | 0 | 0 | 0 | 0 | 0 |
| 71.5473 | 14.0453 | -6.6850 H   | 0 | 0 | 0 | 0 | 0 | 0 | 0 | 0 | 0 | 0 | 0 |
| 65.0129 | 15.6720 | -6.6703 C   | 0 | 0 | 0 | 0 | 0 | 0 | 0 | 0 | 0 | 0 | 0 |

|         |         |          |   |   |   |   |   |   |   |   |   |   |   |   |
|---------|---------|----------|---|---|---|---|---|---|---|---|---|---|---|---|
| 72.6115 | 16.3763 | -17.6907 | H | 0 | 0 | 0 | 0 | 0 | 0 | 0 | 0 | 0 | 0 | 0 |
| 65.5834 | 16.5695 | -6.3975  | H | 0 | 0 | 0 | 0 | 0 | 0 | 0 | 0 | 0 | 0 | 0 |
| 64.0377 | 15.7169 | -6.1557  | H | 0 | 0 | 0 | 0 | 0 | 0 | 0 | 0 | 0 | 0 | 0 |
| 65.5600 | 14.7993 | -6.2903  | H | 0 | 0 | 0 | 0 | 0 | 0 | 0 | 0 | 0 | 0 | 0 |
| 66.6981 | 17.3309 | -12.5777 | N | 0 | 0 | 0 | 0 | 0 | 0 | 0 | 0 | 0 | 0 | 0 |
| 64.1603 | 11.9871 | -16.7219 | O | 0 | 0 | 0 | 0 | 0 | 0 | 0 | 0 | 0 | 0 | 0 |
| 64.3369 | 10.7040 | -17.2845 | C | 0 | 0 | 0 | 0 | 0 | 0 | 0 | 0 | 0 | 0 | 0 |
| 65.0772 | 12.9045 | -18.5249 | O | 0 | 0 | 0 | 0 | 0 | 0 | 0 | 0 | 0 | 0 | 0 |
| 63.7938 | 10.5914 | -18.2289 | H | 0 | 0 | 0 | 0 | 0 | 0 | 0 | 0 | 0 | 0 | 0 |
| 63.9092 | 10.0547 | -16.5164 | H | 0 | 0 | 0 | 0 | 0 | 0 | 0 | 0 | 0 | 0 | 0 |
| 65.3970 | 10.4732 | -17.4356 | H | 0 | 0 | 0 | 0 | 0 | 0 | 0 | 0 | 0 | 0 | 0 |
| 66.8717 | 17.7600 | -13.8571 | C | 0 | 0 | 0 | 0 | 0 | 0 | 0 | 0 | 0 | 0 | 0 |
| 66.7458 | 18.2314 | -11.5580 | C | 0 | 0 | 0 | 0 | 0 | 0 | 0 | 0 | 0 | 0 | 0 |
| 67.0918 | 19.1108 | -14.1570 | C | 0 | 0 | 0 | 0 | 0 | 0 | 0 | 0 | 0 | 0 | 0 |
| 66.9627 | 19.5886 | -11.8025 | C | 0 | 0 | 0 | 0 | 0 | 0 | 0 | 0 | 0 | 0 | 0 |
| 67.1346 | 20.0334 | -13.1095 | C | 0 | 0 | 0 | 0 | 0 | 0 | 0 | 0 | 0 | 0 | 0 |
| 67.3011 | 21.0969 | -13.3175 | H | 0 | 0 | 0 | 0 | 0 | 0 | 0 | 0 | 0 | 0 | 0 |
| 66.9920 | 20.2940 | -10.9649 | H | 0 | 0 | 0 | 0 | 0 | 0 | 0 | 0 | 0 | 0 | 0 |
| 66.6010 | 17.8342 | -10.5406 | H | 0 | 0 | 0 | 0 | 0 | 0 | 0 | 0 | 0 | 0 | 0 |
| 66.8233 | 16.9937 | -14.6510 | H | 0 | 0 | 0 | 0 | 0 | 0 | 0 | 0 | 0 | 0 | 0 |
| 67.2772 | 19.5411 | -15.5742 | C | 0 | 0 | 0 | 0 | 0 | 0 | 0 | 0 | 0 | 0 | 0 |
| 65.9668 | 19.9791 | -16.2348 | C | 0 | 0 | 0 | 0 | 0 | 0 | 0 | 0 | 0 | 0 | 0 |
| 65.0087 | 18.9386 | -16.3251 | O | 0 | 0 | 0 | 0 | 0 | 0 | 0 | 0 | 0 | 0 | 0 |
| 67.7481 | 18.7242 | -16.1596 | H | 0 | 0 | 0 | 0 | 0 | 0 | 0 | 0 | 0 | 0 | 0 |
| 67.9877 | 20.3909 | -15.6138 | H | 0 | 0 | 0 | 0 | 0 | 0 | 0 | 0 | 0 | 0 | 0 |
| 65.1072 | 17.9912 | -17.3120 | C | 0 | 0 | 0 | 0 | 0 | 0 | 0 | 0 | 0 | 0 | 0 |
| 64.0438 | 16.9264 | -17.1776 | C | 0 | 0 | 0 | 0 | 0 | 0 | 0 | 0 | 0 | 0 | 0 |
| 64.4678 | 15.5679 | -17.7296 | C | 0 | 0 | 0 | 0 | 0 | 0 | 0 | 0 | 0 | 0 | 0 |
| 63.1442 | 17.2933 | -17.7129 | H | 0 | 0 | 0 | 0 | 0 | 0 | 0 | 0 | 0 | 0 | 0 |
| 63.7369 | 16.8352 | -16.1123 | H | 0 | 0 | 0 | 0 | 0 | 0 | 0 | 0 | 0 | 0 | 0 |
| 63.8653 | 15.3402 | -18.6332 | H | 0 | 0 | 0 | 0 | 0 | 0 | 0 | 0 | 0 | 0 | 0 |
| 65.5216 | 15.5892 | -18.0849 | H | 0 | 0 | 0 | 0 | 0 | 0 | 0 | 0 | 0 | 0 | 0 |
| 66.1667 | 20.4340 | -17.2235 | H | 0 | 0 | 0 | 0 | 0 | 0 | 0 | 0 | 0 | 0 | 0 |
| 65.4204 | 20.7122 | -15.6148 | H | 0 | 0 | 0 | 0 | 0 | 0 | 0 | 0 | 0 | 0 | 0 |
| 65.9757 | 18.1096 | -18.1537 | O | 0 | 0 | 0 | 0 | 0 | 0 | 0 | 0 | 0 | 0 | 0 |
| 1       | 2       | 1        | 0 | 0 | 0 | 0 |   |   |   |   |   |   |   |   |
| 1       | 5       | 1        | 0 | 0 | 0 | 0 |   |   |   |   |   |   |   |   |
| 1       | 6       | 1        | 0 | 0 | 0 | 0 |   |   |   |   |   |   |   |   |
| 1       | 59      | 1        | 0 | 0 | 0 | 0 |   |   |   |   |   |   |   |   |
| 2       | 3       | 1        | 0 | 0 | 0 | 0 |   |   |   |   |   |   |   |   |
| 2       | 4       | 2        | 0 | 0 | 0 | 0 |   |   |   |   |   |   |   |   |
| 3       | 7       | 1        | 0 | 0 | 0 | 0 |   |   |   |   |   |   |   |   |
| 7       | 8       | 1        | 0 | 0 | 0 | 0 |   |   |   |   |   |   |   |   |
| 7       | 9       | 1        | 0 | 0 | 0 | 0 |   |   |   |   |   |   |   |   |
| 7       | 72      | 1        | 0 | 0 | 0 | 0 |   |   |   |   |   |   |   |   |
| 10      | 11      | 1        | 0 | 0 | 0 | 0 |   |   |   |   |   |   |   |   |
| 10      | 32      | 1        | 0 | 0 | 0 | 0 |   |   |   |   |   |   |   |   |
| 10      | 43      | 2        | 0 | 0 | 0 | 0 |   |   |   |   |   |   |   |   |
| 11      | 12      | 1        | 0 | 0 | 0 | 0 |   |   |   |   |   |   |   |   |
| 11      | 67      | 1        | 0 | 0 | 0 | 0 |   |   |   |   |   |   |   |   |
| 12      | 13      | 2        | 0 | 0 | 0 | 0 |   |   |   |   |   |   |   |   |
| 12      | 14      | 1        | 0 | 0 | 0 | 0 |   |   |   |   |   |   |   |   |
| 13      | 33      | 1        | 0 | 0 | 0 | 0 |   |   |   |   |   |   |   |   |
| 13      | 43      | 1        | 0 | 0 | 0 | 0 |   |   |   |   |   |   |   |   |

|       |   |   |   |   |   |
|-------|---|---|---|---|---|
| 14 15 | 2 | 0 | 0 | 0 | 0 |
| 14 34 | 1 | 0 | 0 | 0 | 0 |
| 15 16 | 1 | 0 | 0 | 0 | 0 |
| 15 19 | 1 | 0 | 0 | 0 | 0 |
| 16 17 | 2 | 0 | 0 | 0 | 0 |
| 16 67 | 1 | 0 | 0 | 0 | 0 |
| 17 18 | 1 | 0 | 0 | 0 | 0 |
| 17 20 | 1 | 0 | 0 | 0 | 0 |
| 18 19 | 2 | 0 | 0 | 0 | 0 |
| 18 35 | 1 | 0 | 0 | 0 | 0 |
| 19 71 | 1 | 0 | 0 | 0 | 0 |
| 20 21 | 2 | 0 | 0 | 0 | 0 |
| 20 36 | 1 | 0 | 0 | 0 | 0 |
| 21 22 | 1 | 0 | 0 | 0 | 0 |
| 21 25 | 1 | 0 | 0 | 0 | 0 |
| 22 23 | 1 | 0 | 0 | 0 | 0 |
| 22 67 | 1 | 0 | 0 | 0 | 0 |
| 23 24 | 1 | 0 | 0 | 0 | 0 |
| 23 26 | 2 | 0 | 0 | 0 | 0 |
| 24 25 | 2 | 0 | 0 | 0 | 0 |
| 24 37 | 1 | 0 | 0 | 0 | 0 |
| 25 38 | 1 | 0 | 0 | 0 | 0 |
| 26 27 | 1 | 0 | 0 | 0 | 0 |
| 26 39 | 1 | 0 | 0 | 0 | 0 |
| 27 28 | 2 | 0 | 0 | 0 | 0 |
| 27 31 | 1 | 0 | 0 | 0 | 0 |
| 28 29 | 1 | 0 | 0 | 0 | 0 |
| 28 67 | 1 | 0 | 0 | 0 | 0 |
| 29 30 | 1 | 0 | 0 | 0 | 0 |
| 29 32 | 2 | 0 | 0 | 0 | 0 |
| 30 31 | 1 | 0 | 0 | 0 | 0 |
| 30 40 | 1 | 0 | 0 | 0 | 0 |
| 30 45 | 1 | 0 | 0 | 0 | 0 |
| 31 41 | 1 | 0 | 0 | 0 | 0 |
| 31 59 | 1 | 0 | 0 | 0 | 0 |
| 32 42 | 1 | 0 | 0 | 0 | 0 |
| 33 65 | 1 | 0 | 0 | 0 | 0 |
| 33 66 | 2 | 0 | 0 | 0 | 0 |
| 35 44 | 1 | 0 | 0 | 0 | 0 |
| 35 46 | 1 | 0 | 0 | 0 | 0 |
| 35 47 | 1 | 0 | 0 | 0 | 0 |
| 37 39 | 1 | 0 | 0 | 0 | 0 |
| 37 48 | 2 | 0 | 0 | 0 | 0 |
| 38 49 | 1 | 0 | 0 | 0 | 0 |
| 38 50 | 1 | 0 | 0 | 0 | 0 |
| 38 51 | 1 | 0 | 0 | 0 | 0 |
| 39 52 | 1 | 0 | 0 | 0 | 0 |
| 39 99 | 1 | 0 | 0 | 0 | 0 |
| 43 56 | 1 | 0 | 0 | 0 | 0 |
| 44 53 | 1 | 0 | 0 | 0 | 0 |
| 44 54 | 1 | 0 | 0 | 0 | 0 |
| 44 55 | 1 | 0 | 0 | 0 | 0 |
| 45 62 | 1 | 0 | 0 | 0 | 0 |
| 45 63 | 1 | 0 | 0 | 0 | 0 |

```
45 64 1 0 0 0 0
52 77 1 0 0 0 0
52 79 2 0 0 0 0
56 57 1 0 0 0 0
56 58 1 0 0 0 0
56 68 1 0 0 0 0
59 60 1 0 0 0 0
59 61 1 0 0 0 0
66 69 1 0 0 0 0
66 70 1 0 0 0 0
67 76 1 0 0 0 0
71 73 1 0 0 0 0
71 74 1 0 0 0 0
71 75 1 0 0 0 0
76 83 2 0 0 0 0
76 84 1 0 0 0 0
77 78 1 0 0 0 0
78 80 1 0 0 0 0
78 81 1 0 0 0 0
78 82 1 0 0 0 0
83 85 1 0 0 0 0
83 91 1 0 0 0 0
84 86 2 0 0 0 0
84 90 1 0 0 0 0
85 87 2 0 0 0 0
85 92 1 0 0 0 0
86 87 1 0 0 0 0
86 89 1 0 0 0 0
87 88 1 0 0 0 0
92 93 1 0 0 0 0
92 95 1 0 0 0 0
92 96 1 0 0 0 0
93 94 1 0 0 0 0
93104 1 0 0 0 0
93105 1 0 0 0 0
94 97 1 0 0 0 0
97 98 1 0 0 0 0
97106 2 0 0 0 0
98 99 1 0 0 0 0
98100 1 0 0 0 0
98101 1 0 0 0 0
99102 1 0 0 0 0
99103 1 0 0 0 0
```

M END

---

<sup>a</sup> The MM+/PM3 calculations were performed until the RMS gradient reached a value below 0.01 kcal Å<sup>-1</sup> mol<sup>-1</sup> by using Polak-Ribiere algorithm.



**Table S4.** Optimized molecular configuration image and its Cartesian coordinates of **Zn-4'**(C<sub>2,2</sub>) (MM+/PM3).<sup>a</sup>

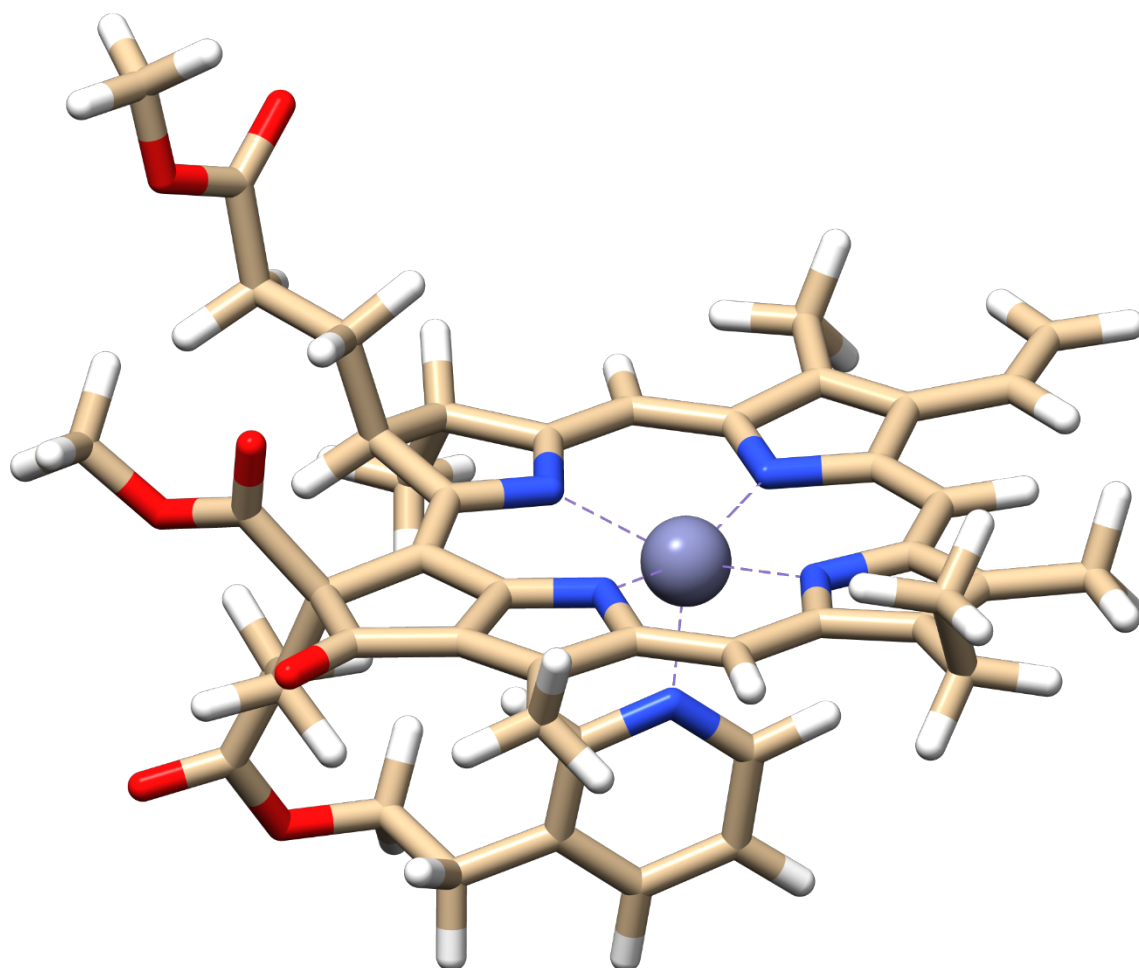


---

| 106116 0 0 0 0 0 0 0 0999 V2000 |         |          |   |   |   |   |   |   |   |   |   |   |   |   |
|---------------------------------|---------|----------|---|---|---|---|---|---|---|---|---|---|---|---|
| 69.8107                         | 15.2914 | -16.6035 | C | 0 | 0 | 0 | 0 | 0 | 0 | 0 | 0 | 0 | 0 | 0 |
| 71.1613                         | 15.7866 | -16.1369 | C | 0 | 0 | 0 | 0 | 0 | 0 | 0 | 0 | 0 | 0 | 0 |
| 71.6420                         | 16.8259 | -16.8835 | O | 0 | 0 | 0 | 0 | 0 | 0 | 0 | 0 | 0 | 0 | 0 |
| 71.8308                         | 15.3609 | -15.2166 | O | 0 | 0 | 0 | 0 | 0 | 0 | 0 | 0 | 0 | 0 | 0 |
| 69.6644                         | 15.5047 | -17.6832 | H | 0 | 0 | 0 | 0 | 0 | 0 | 0 | 0 | 0 | 0 | 0 |
| 69.7831                         | 14.1868 | -16.5038 | H | 0 | 0 | 0 | 0 | 0 | 0 | 0 | 0 | 0 | 0 | 0 |
| 72.8636                         | 17.4252 | -16.5101 | C | 0 | 0 | 0 | 0 | 0 | 0 | 0 | 0 | 0 | 0 | 0 |
| 73.6999                         | 16.7226 | -16.5897 | H | 0 | 0 | 0 | 0 | 0 | 0 | 0 | 0 | 0 | 0 | 0 |
| 72.8230                         | 17.8386 | -15.4968 | H | 0 | 0 | 0 | 0 | 0 | 0 | 0 | 0 | 0 | 0 | 0 |
| 65.4284                         | 13.5693 | -11.9553 | C | 0 | 0 | 0 | 0 | 0 | 0 | 0 | 0 | 0 | 0 | 0 |
| 64.5995                         | 14.6179 | -11.7227 | N | 0 | 0 | 0 | 0 | 0 | 0 | 0 | 0 | 0 | 0 | 0 |
| 64.0417                         | 14.4613 | -10.4080 | C | 0 | 0 | 0 | 0 | 0 | 0 | 0 | 0 | 0 | 0 | 0 |
| 64.5795                         | 13.2020 | -9.8494  | C | 0 | 0 | 0 | 0 | 0 | 0 | 0 | 0 | 0 | 0 | 0 |
| 63.2109                         | 15.3244 | -9.7700  | C | 0 | 0 | 0 | 0 | 0 | 0 | 0 | 0 | 0 | 0 | 0 |
| 62.7594                         | 16.5795 | -10.2746 | C | 0 | 0 | 0 | 0 | 0 | 0 | 0 | 0 | 0 | 0 | 0 |

|         |         |             |   |   |   |   |   |   |   |   |   |   |   |
|---------|---------|-------------|---|---|---|---|---|---|---|---|---|---|---|
| 63.0538 | 17.1034 | -11.5130 N  | 0 | 0 | 0 | 0 | 0 | 0 | 0 | 0 | 0 | 0 | 0 |
| 62.4950 | 18.3921 | -11.5889 C  | 0 | 0 | 0 | 0 | 0 | 0 | 0 | 0 | 0 | 0 | 0 |
| 61.8066 | 18.6517 | -10.3455 C  | 0 | 0 | 0 | 0 | 0 | 0 | 0 | 0 | 0 | 0 | 0 |
| 61.9681 | 17.5356 | -9.5379 C   | 0 | 0 | 0 | 0 | 0 | 0 | 0 | 0 | 0 | 0 | 0 |
| 62.6201 | 19.2889 | -12.6625 C  | 0 | 0 | 0 | 0 | 0 | 0 | 0 | 0 | 0 | 0 | 0 |
| 63.3700 | 19.0672 | -13.7953 C  | 0 | 0 | 0 | 0 | 0 | 0 | 0 | 0 | 0 | 0 | 0 |
| 64.1361 | 17.8689 | -14.0146 N  | 0 | 0 | 0 | 0 | 0 | 0 | 0 | 0 | 0 | 0 | 0 |
| 64.7285 | 17.9993 | -15.2113 C  | 0 | 0 | 0 | 0 | 0 | 0 | 0 | 0 | 0 | 0 | 0 |
| 64.3793 | 19.2677 | -15.8254 C  | 0 | 0 | 0 | 0 | 0 | 0 | 0 | 0 | 0 | 0 | 0 |
| 63.5551 | 19.9447 | -14.9546 C  | 0 | 0 | 0 | 0 | 0 | 0 | 0 | 0 | 0 | 0 | 0 |
| 65.6401 | 17.2174 | -15.9990 C  | 0 | 0 | 0 | 0 | 0 | 0 | 0 | 0 | 0 | 0 | 0 |
| 66.1974 | 16.0719 | -15.5009 C  | 0 | 0 | 0 | 0 | 0 | 0 | 0 | 0 | 0 | 0 | 0 |
| 65.7051 | 15.4491 | -14.3255 N  | 0 | 0 | 0 | 0 | 0 | 0 | 0 | 0 | 0 | 0 | 0 |
| 66.3276 | 14.2181 | -14.1719 C  | 0 | 0 | 0 | 0 | 0 | 0 | 0 | 0 | 0 | 0 | 0 |
| 67.2476 | 13.9113 | -15.3401 C  | 0 | 0 | 0 | 0 | 0 | 0 | 0 | 0 | 0 | 0 | 0 |
| 67.3496 | 15.2691 | -16.0802 C  | 0 | 0 | 0 | 0 | 0 | 0 | 0 | 0 | 0 | 0 | 0 |
| 66.2002 | 13.3491 | -13.1182 C  | 0 | 0 | 0 | 0 | 0 | 0 | 0 | 0 | 0 | 0 | 0 |
| 64.1942 | 12.7617 | -8.5296 C   | 0 | 0 | 0 | 0 | 0 | 0 | 0 | 0 | 0 | 0 | 0 |
| 62.8785 | 15.0432 | -8.7533 H   | 0 | 0 | 0 | 0 | 0 | 0 | 0 | 0 | 0 | 0 | 0 |
| 61.0544 | 19.8715 | -9.9753 C   | 0 | 0 | 0 | 0 | 0 | 0 | 0 | 0 | 0 | 0 | 0 |
| 62.0828 | 20.2466 | -12.5769 H  | 0 | 0 | 0 | 0 | 0 | 0 | 0 | 0 | 0 | 0 | 0 |
| 65.0234 | 19.3358 | -17.1315 C  | 0 | 0 | 0 | 0 | 0 | 0 | 0 | 0 | 0 | 0 | 0 |
| 62.9651 | 21.2796 | -15.1153 C  | 0 | 0 | 0 | 0 | 0 | 0 | 0 | 0 | 0 | 0 | 0 |
| 65.7670 | 17.9387 | -17.3395 C  | 0 | 0 | 0 | 0 | 0 | 0 | 0 | 0 | 0 | 0 | 0 |
| 68.2444 | 13.5857 | -14.9536 H  | 0 | 0 | 0 | 0 | 0 | 0 | 0 | 0 | 0 | 0 | 0 |
| 67.2249 | 15.1510 | -17.1899 H  | 0 | 0 | 0 | 0 | 0 | 0 | 0 | 0 | 0 | 0 | 0 |
| 66.7665 | 12.4019 | -13.1325 H  | 0 | 0 | 0 | 0 | 0 | 0 | 0 | 0 | 0 | 0 | 0 |
| 65.4239 | 12.6650 | -10.7867 C  | 0 | 0 | 0 | 0 | 0 | 0 | 0 | 0 | 0 | 0 | 0 |
| 61.9680 | 21.0344 | -9.6471 C   | 0 | 0 | 0 | 0 | 0 | 0 | 0 | 0 | 0 | 0 | 0 |
| 66.6936 | 12.8135 | -16.2279 C  | 0 | 0 | 0 | 0 | 0 | 0 | 0 | 0 | 0 | 0 | 0 |
| 60.4222 | 19.6259 | -9.0905 H   | 0 | 0 | 0 | 0 | 0 | 0 | 0 | 0 | 0 | 0 | 0 |
| 60.3579 | 20.1456 | -10.7917 H  | 0 | 0 | 0 | 0 | 0 | 0 | 0 | 0 | 0 | 0 | 0 |
| 65.0035 | 20.2271 | -17.9486 O  | 0 | 0 | 0 | 0 | 0 | 0 | 0 | 0 | 0 | 0 | 0 |
| 61.9178 | 21.2999 | -14.7842 H  | 0 | 0 | 0 | 0 | 0 | 0 | 0 | 0 | 0 | 0 | 0 |
| 62.9988 | 21.6143 | -16.1602 H  | 0 | 0 | 0 | 0 | 0 | 0 | 0 | 0 | 0 | 0 | 0 |
| 63.5183 | 22.0136 | -14.5122 H  | 0 | 0 | 0 | 0 | 0 | 0 | 0 | 0 | 0 | 0 | 0 |
| 64.9593 | 17.2225 | -18.4416 C  | 0 | 0 | 0 | 0 | 0 | 0 | 0 | 0 | 0 | 0 | 0 |
| 67.2086 | 18.2680 | -17.7173 C  | 0 | 0 | 0 | 0 | 0 | 0 | 0 | 0 | 0 | 0 | 0 |
| 62.5843 | 21.3235 | -10.5092 H  | 0 | 0 | 0 | 0 | 0 | 0 | 0 | 0 | 0 | 0 | 0 |
| 62.6530 | 20.7900 | -8.8250 H   | 0 | 0 | 0 | 0 | 0 | 0 | 0 | 0 | 0 | 0 | 0 |
| 61.3895 | 21.9165 | -9.3446 H   | 0 | 0 | 0 | 0 | 0 | 0 | 0 | 0 | 0 | 0 | 0 |
| 66.2269 | 11.4339 | -10.7440 C  | 0 | 0 | 0 | 0 | 0 | 0 | 0 | 0 | 0 | 0 | 0 |
| 65.5939 | 10.5463 | -10.6052 H  | 0 | 0 | 0 | 0 | 0 | 0 | 0 | 0 | 0 | 0 | 0 |
| 66.7866 | 11.3060 | -11.6867 H  | 0 | 0 | 0 | 0 | 0 | 0 | 0 | 0 | 0 | 0 | 0 |
| 68.6969 | 15.9330 | -15.7853 C  | 0 | 0 | 0 | 0 | 0 | 0 | 0 | 0 | 0 | 0 | 0 |
| 68.9271 | 15.8652 | -14.7022 H  | 0 | 0 | 0 | 0 | 0 | 0 | 0 | 0 | 0 | 0 | 0 |
| 68.6445 | 17.0172 | -16.0070 H  | 0 | 0 | 0 | 0 | 0 | 0 | 0 | 0 | 0 | 0 | 0 |
| 65.7314 | 13.0931 | -16.6814 H  | 0 | 0 | 0 | 0 | 0 | 0 | 0 | 0 | 0 | 0 | 0 |
| 66.5329 | 11.8892 | -15.6573 H  | 0 | 0 | 0 | 0 | 0 | 0 | 0 | 0 | 0 | 0 | 0 |
| 67.3885 | 12.5857 | -17.0472 H  | 0 | 0 | 0 | 0 | 0 | 0 | 0 | 0 | 0 | 0 | 0 |
| 63.5027 | 13.4565 | -8.0197 H   | 0 | 0 | 0 | 0 | 0 | 0 | 0 | 0 | 0 | 0 | 0 |
| 64.5959 | 11.6425 | -7.9300 C   | 0 | 0 | 0 | 0 | 0 | 0 | 0 | 0 | 0 | 0 | 0 |
| 64.0431 | 16.0531 | -13.0582 Zn | 0 | 0 | 0 | 0 | 0 | 0 | 0 | 0 | 0 | 0 | 0 |
| 66.9551 | 11.4597 | -9.9214 H   | 0 | 0 | 0 | 0 | 0 | 0 | 0 | 0 | 0 | 0 | 0 |

|         |         |          |   |   |   |   |   |   |   |   |   |   |   |   |
|---------|---------|----------|---|---|---|---|---|---|---|---|---|---|---|---|
| 65.2735 | 10.9222 | -8.3806  | H | 0 | 0 | 0 | 0 | 0 | 0 | 0 | 0 | 0 | 0 | 0 |
| 64.2625 | 11.3737 | -6.9319  | H | 0 | 0 | 0 | 0 | 0 | 0 | 0 | 0 | 0 | 0 | 0 |
| 61.4228 | 17.3638 | -8.1821  | C | 0 | 0 | 0 | 0 | 0 | 0 | 0 | 0 | 0 | 0 | 0 |
| 72.9658 | 18.2268 | -17.2460 | H | 0 | 0 | 0 | 0 | 0 | 0 | 0 | 0 | 0 | 0 | 0 |
| 60.8697 | 16.4205 | -8.0853  | H | 0 | 0 | 0 | 0 | 0 | 0 | 0 | 0 | 0 | 0 | 0 |
| 62.2209 | 17.3629 | -7.4280  | H | 0 | 0 | 0 | 0 | 0 | 0 | 0 | 0 | 0 | 0 | 0 |
| 60.7333 | 18.1932 | -7.9487  | H | 0 | 0 | 0 | 0 | 0 | 0 | 0 | 0 | 0 | 0 | 0 |
| 67.9394 | 19.0683 | -17.1684 | O | 0 | 0 | 0 | 0 | 0 | 0 | 0 | 0 | 0 | 0 | 0 |
| 67.6907 | 17.6023 | -18.8119 | O | 0 | 0 | 0 | 0 | 0 | 0 | 0 | 0 | 0 | 0 | 0 |
| 68.9676 | 17.9464 | -19.3068 | C | 0 | 0 | 0 | 0 | 0 | 0 | 0 | 0 | 0 | 0 | 0 |
| 69.7561 | 17.7376 | -18.5738 | H | 0 | 0 | 0 | 0 | 0 | 0 | 0 | 0 | 0 | 0 | 0 |
| 69.0643 | 17.2868 | -20.1730 | H | 0 | 0 | 0 | 0 | 0 | 0 | 0 | 0 | 0 | 0 | 0 |
| 65.1655 | 17.7112 | -19.4164 | H | 0 | 0 | 0 | 0 | 0 | 0 | 0 | 0 | 0 | 0 | 0 |
| 69.0155 | 18.9957 | -19.6162 | H | 0 | 0 | 0 | 0 | 0 | 0 | 0 | 0 | 0 | 0 | 0 |
| 63.8790 | 17.3907 | -18.2410 | H | 0 | 0 | 0 | 0 | 0 | 0 | 0 | 0 | 0 | 0 | 0 |
| 65.1859 | 15.7243 | -18.5569 | C | 0 | 0 | 0 | 0 | 0 | 0 | 0 | 0 | 0 | 0 | 0 |
| 64.4278 | 15.1547 | -19.7336 | C | 0 | 0 | 0 | 0 | 0 | 0 | 0 | 0 | 0 | 0 | 0 |
| 64.8740 | 15.2117 | -17.6152 | H | 0 | 0 | 0 | 0 | 0 | 0 | 0 | 0 | 0 | 0 | 0 |
| 66.2699 | 15.4901 | -18.6639 | H | 0 | 0 | 0 | 0 | 0 | 0 | 0 | 0 | 0 | 0 | 0 |
| 63.3718 | 14.2845 | -19.6275 | O | 0 | 0 | 0 | 0 | 0 | 0 | 0 | 0 | 0 | 0 | 0 |
| 62.9093 | 13.8805 | -18.3530 | C | 0 | 0 | 0 | 0 | 0 | 0 | 0 | 0 | 0 | 0 | 0 |
| 61.7719 | 14.7787 | -17.8470 | C | 0 | 0 | 0 | 0 | 0 | 0 | 0 | 0 | 0 | 0 | 0 |
| 60.8248 | 14.5289 | -18.3647 | H | 0 | 0 | 0 | 0 | 0 | 0 | 0 | 0 | 0 | 0 | 0 |
| 61.9761 | 15.8416 | -18.0969 | H | 0 | 0 | 0 | 0 | 0 | 0 | 0 | 0 | 0 | 0 | 0 |
| 61.6171 | 14.6437 | -16.3684 | C | 0 | 0 | 0 | 0 | 0 | 0 | 0 | 0 | 0 | 0 | 0 |
| 60.5583 | 13.9381 | -15.7944 | C | 0 | 0 | 0 | 0 | 0 | 0 | 0 | 0 | 0 | 0 | 0 |
| 60.4749 | 13.8499 | -14.4071 | C | 0 | 0 | 0 | 0 | 0 | 0 | 0 | 0 | 0 | 0 | 0 |
| 61.4487 | 14.4584 | -13.6124 | C | 0 | 0 | 0 | 0 | 0 | 0 | 0 | 0 | 0 | 0 | 0 |
| 62.5597 | 15.2459 | -15.5250 | C | 0 | 0 | 0 | 0 | 0 | 0 | 0 | 0 | 0 | 0 | 0 |
| 62.4808 | 15.1483 | -14.1705 | N | 0 | 0 | 0 | 0 | 0 | 0 | 0 | 0 | 0 | 0 | 0 |
| 63.4048 | 15.8318 | -15.9349 | H | 0 | 0 | 0 | 0 | 0 | 0 | 0 | 0 | 0 | 0 | 0 |
| 61.4217 | 14.4100 | -12.5135 | H | 0 | 0 | 0 | 0 | 0 | 0 | 0 | 0 | 0 | 0 | 0 |
| 59.6497 | 13.3059 | -13.9336 | H | 0 | 0 | 0 | 0 | 0 | 0 | 0 | 0 | 0 | 0 | 0 |
| 59.7998 | 13.4627 | -16.4283 | H | 0 | 0 | 0 | 0 | 0 | 0 | 0 | 0 | 0 | 0 | 0 |
| 64.6402 | 15.3396 | -20.9119 | O | 0 | 0 | 0 | 0 | 0 | 0 | 0 | 0 | 0 | 0 | 0 |
| 62.5618 | 12.8504 | -18.5416 | H | 0 | 0 | 0 | 0 | 0 | 0 | 0 | 0 | 0 | 0 | 0 |
| 63.7418 | 13.8384 | -17.6154 | H | 0 | 0 | 0 | 0 | 0 | 0 | 0 | 0 | 0 | 0 | 0 |
| 1       | 2       | 1        | 0 | 0 | 0 | 0 |   |   |   |   |   |   |   |   |
| 1       | 5       | 1        | 0 | 0 | 0 | 0 |   |   |   |   |   |   |   |   |
| 1       | 6       | 1        | 0 | 0 | 0 | 0 |   |   |   |   |   |   |   |   |
| 1       | 60      | 1        | 0 | 0 | 0 | 0 |   |   |   |   |   |   |   |   |
| 2       | 3       | 1        | 0 | 0 | 0 | 0 |   |   |   |   |   |   |   |   |
| 2       | 4       | 2        | 0 | 0 | 0 | 0 |   |   |   |   |   |   |   |   |
| 3       | 7       | 1        | 0 | 0 | 0 | 0 |   |   |   |   |   |   |   |   |
| 7       | 8       | 1        | 0 | 0 | 0 | 0 |   |   |   |   |   |   |   |   |
| 7       | 9       | 1        | 0 | 0 | 0 | 0 |   |   |   |   |   |   |   |   |
| 7       | 73      | 1        | 0 | 0 | 0 | 0 |   |   |   |   |   |   |   |   |
| 10      | 11      | 1        | 0 | 0 | 0 | 0 |   |   |   |   |   |   |   |   |
| 10      | 32      | 1        | 0 | 0 | 0 | 0 |   |   |   |   |   |   |   |   |
| 10      | 43      | 2        | 0 | 0 | 0 | 0 |   |   |   |   |   |   |   |   |
| 11      | 12      | 1        | 0 | 0 | 0 | 0 |   |   |   |   |   |   |   |   |
| 11      | 68      | 1        | 0 | 0 | 0 | 0 |   |   |   |   |   |   |   |   |
| 12      | 13      | 2        | 0 | 0 | 0 | 0 |   |   |   |   |   |   |   |   |
| 12      | 14      | 1        | 0 | 0 | 0 | 0 |   |   |   |   |   |   |   |   |

|       |   |   |   |   |   |
|-------|---|---|---|---|---|
| 13 33 | 1 | 0 | 0 | 0 | 0 |
| 13 43 | 1 | 0 | 0 | 0 | 0 |
| 14 15 | 2 | 0 | 0 | 0 | 0 |
| 14 34 | 1 | 0 | 0 | 0 | 0 |
| 15 16 | 1 | 0 | 0 | 0 | 0 |
| 15 19 | 1 | 0 | 0 | 0 | 0 |
| 16 17 | 2 | 0 | 0 | 0 | 0 |
| 16 68 | 1 | 0 | 0 | 0 | 0 |
| 17 18 | 1 | 0 | 0 | 0 | 0 |
| 17 20 | 1 | 0 | 0 | 0 | 0 |
| 18 19 | 2 | 0 | 0 | 0 | 0 |
| 18 35 | 1 | 0 | 0 | 0 | 0 |
| 19 72 | 1 | 0 | 0 | 0 | 0 |
| 20 21 | 2 | 0 | 0 | 0 | 0 |
| 20 36 | 1 | 0 | 0 | 0 | 0 |
| 21 22 | 1 | 0 | 0 | 0 | 0 |
| 21 25 | 1 | 0 | 0 | 0 | 0 |
| 22 23 | 1 | 0 | 0 | 0 | 0 |
| 22 68 | 1 | 0 | 0 | 0 | 0 |
| 23 24 | 1 | 0 | 0 | 0 | 0 |
| 23 26 | 2 | 0 | 0 | 0 | 0 |
| 24 25 | 2 | 0 | 0 | 0 | 0 |
| 24 37 | 1 | 0 | 0 | 0 | 0 |
| 25 38 | 1 | 0 | 0 | 0 | 0 |
| 26 27 | 1 | 0 | 0 | 0 | 0 |
| 26 39 | 1 | 0 | 0 | 0 | 0 |
| 27 28 | 2 | 0 | 0 | 0 | 0 |
| 27 31 | 1 | 0 | 0 | 0 | 0 |
| 28 29 | 1 | 0 | 0 | 0 | 0 |
| 28 68 | 1 | 0 | 0 | 0 | 0 |
| 29 30 | 1 | 0 | 0 | 0 | 0 |
| 29 32 | 2 | 0 | 0 | 0 | 0 |
| 30 31 | 1 | 0 | 0 | 0 | 0 |
| 30 40 | 1 | 0 | 0 | 0 | 0 |
| 30 45 | 1 | 0 | 0 | 0 | 0 |
| 31 41 | 1 | 0 | 0 | 0 | 0 |
| 31 60 | 1 | 0 | 0 | 0 | 0 |
| 32 42 | 1 | 0 | 0 | 0 | 0 |
| 33 66 | 1 | 0 | 0 | 0 | 0 |
| 33 67 | 2 | 0 | 0 | 0 | 0 |
| 35 44 | 1 | 0 | 0 | 0 | 0 |
| 35 46 | 1 | 0 | 0 | 0 | 0 |
| 35 47 | 1 | 0 | 0 | 0 | 0 |
| 37 39 | 1 | 0 | 0 | 0 | 0 |
| 37 48 | 2 | 0 | 0 | 0 | 0 |
| 38 49 | 1 | 0 | 0 | 0 | 0 |
| 38 50 | 1 | 0 | 0 | 0 | 0 |
| 38 51 | 1 | 0 | 0 | 0 | 0 |
| 39 52 | 1 | 0 | 0 | 0 | 0 |
| 39 53 | 1 | 0 | 0 | 0 | 0 |
| 43 57 | 1 | 0 | 0 | 0 | 0 |
| 44 54 | 1 | 0 | 0 | 0 | 0 |
| 44 55 | 1 | 0 | 0 | 0 | 0 |
| 44 56 | 1 | 0 | 0 | 0 | 0 |

```
45 63 1 0 0 0 0
45 64 1 0 0 0 0
45 65 1 0 0 0 0
52 82 1 0 0 0 0
52 84 1 0 0 0 0
52 85 1 0 0 0 0
53 77 2 0 0 0 0
53 78 1 0 0 0 0
57 58 1 0 0 0 0
57 59 1 0 0 0 0
57 69 1 0 0 0 0
60 61 1 0 0 0 0
60 62 1 0 0 0 0
67 70 1 0 0 0 0
67 71 1 0 0 0 0
68 99 1 0 0 0 0
72 74 1 0 0 0 0
72 75 1 0 0 0 0
72 76 1 0 0 0 0
78 79 1 0 0 0 0
79 80 1 0 0 0 0
79 81 1 0 0 0 0
79 83 1 0 0 0 0
85 86 1 0 0 0 0
85 87 1 0 0 0 0
85 88 1 0 0 0 0
86 89 1 0 0 0 0
86104 2 0 0 0 0
89 90 1 0 0 0 0
90 91 1 0 0 0 0
90105 1 0 0 0 0
90106 1 0 0 0 0
91 92 1 0 0 0 0
91 93 1 0 0 0 0
91 94 1 0 0 0 0
94 95 1 0 0 0 0
94 98 2 0 0 0 0
95 96 2 0 0 0 0
95103 1 0 0 0 0
96 97 1 0 0 0 0
96102 1 0 0 0 0
97 99 2 0 0 0 0
97101 1 0 0 0 0
98 99 1 0 0 0 0
98100 1 0 0 0 0
```

M END

---

<sup>a</sup> The MM+/PM3 calculations were performed until the RMS gradient reached a value below 0.01 kcal Å<sup>-1</sup> mol<sup>-1</sup> by using Polak-Ribiere algorithm.

**Table S5.** Optimized molecular configuration image and its Cartesian coordinates of **Zn-4(C<sub>3,1</sub>)** (MM+/PM3).<sup>a</sup>

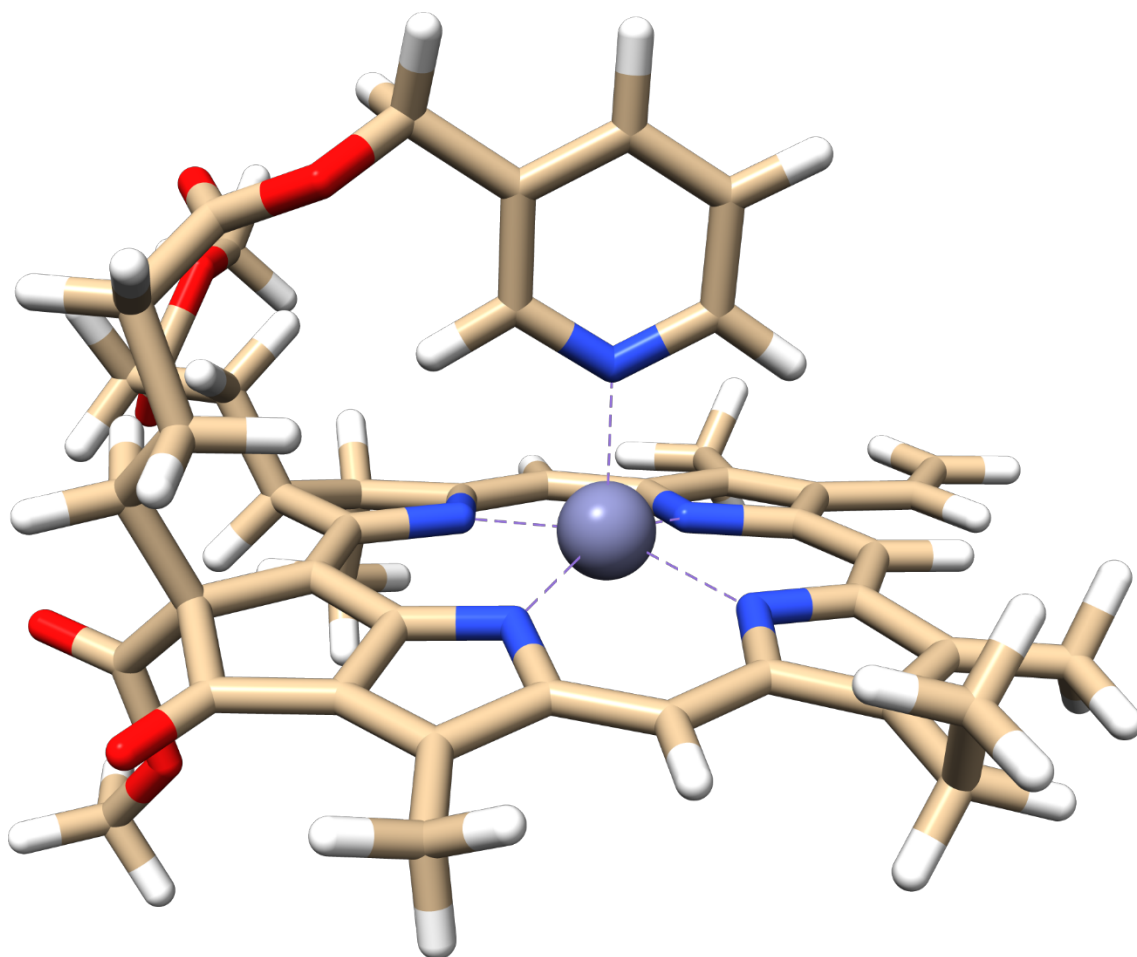


---

| 106116  |         |          |   | 0 |   |   |   | 0 |   |   |   | 0 |   |   |   | 0 |   |   |   | 0 |   |   |   | 0 |   |   |   | 0 |   |   |   | 0999 |   |   |   | V2000 |   |   |   |
|---------|---------|----------|---|---|---|---|---|---|---|---|---|---|---|---|---|---|---|---|---|---|---|---|---|---|---|---|---|---|---|---|---|------|---|---|---|-------|---|---|---|
| 68.2939 | 14.4568 | -18.6704 | C | 0 | 0 | 0 | 0 | 0 | 0 | 0 | 0 | 0 | 0 | 0 | 0 | 0 | 0 | 0 | 0 | 0 | 0 | 0 | 0 | 0 | 0 | 0 | 0 | 0 | 0 | 0 | 0 | 0    | 0 | 0 | 0 | 0     | 0 | 0 | 0 |
| 69.6354 | 13.7600 | -18.6545 | C | 0 | 0 | 0 | 0 | 0 | 0 | 0 | 0 | 0 | 0 | 0 | 0 | 0 | 0 | 0 | 0 | 0 | 0 | 0 | 0 | 0 | 0 | 0 | 0 | 0 | 0 | 0 | 0 | 0    | 0 | 0 | 0 | 0     | 0 | 0 | 0 |
| 70.6900 | 14.6073 | -18.4367 | O | 0 | 0 | 0 | 0 | 0 | 0 | 0 | 0 | 0 | 0 | 0 | 0 | 0 | 0 | 0 | 0 | 0 | 0 | 0 | 0 | 0 | 0 | 0 | 0 | 0 | 0 | 0 | 0 | 0    | 0 | 0 | 0 | 0     | 0 | 0 | 0 |
| 69.8669 | 12.5805 | -18.8326 | O | 0 | 0 | 0 | 0 | 0 | 0 | 0 | 0 | 0 | 0 | 0 | 0 | 0 | 0 | 0 | 0 | 0 | 0 | 0 | 0 | 0 | 0 | 0 | 0 | 0 | 0 | 0 | 0 | 0    | 0 | 0 | 0 | 0     | 0 | 0 | 0 |
| 68.3496 | 15.3076 | -19.3797 | H | 0 | 0 | 0 | 0 | 0 | 0 | 0 | 0 | 0 | 0 | 0 | 0 | 0 | 0 | 0 | 0 | 0 | 0 | 0 | 0 | 0 | 0 | 0 | 0 | 0 | 0 | 0 | 0 | 0    | 0 | 0 | 0 | 0     | 0 | 0 | 0 |
| 67.5280 | 13.7666 | -19.0827 | H | 0 | 0 | 0 | 0 | 0 | 0 | 0 | 0 | 0 | 0 | 0 | 0 | 0 | 0 | 0 | 0 | 0 | 0 | 0 | 0 | 0 | 0 | 0 | 0 | 0 | 0 | 0 | 0 | 0    | 0 | 0 | 0 | 0     | 0 | 0 | 0 |
| 71.9904 | 14.0659 | -18.3698 | C | 0 | 0 | 0 | 0 | 0 | 0 | 0 | 0 | 0 | 0 | 0 | 0 | 0 | 0 | 0 | 0 | 0 | 0 | 0 | 0 | 0 | 0 | 0 | 0 | 0 | 0 | 0 | 0 | 0    | 0 | 0 | 0 | 0     | 0 | 0 | 0 |
| 72.2819 | 13.5825 | -19.3084 | H | 0 | 0 | 0 | 0 | 0 | 0 | 0 | 0 | 0 | 0 | 0 | 0 | 0 | 0 | 0 | 0 | 0 | 0 | 0 | 0 | 0 | 0 | 0 | 0 | 0 | 0 | 0 | 0 | 0    | 0 | 0 | 0 | 0     | 0 | 0 | 0 |
| 72.0907 | 13.3555 | -17.5419 | H | 0 | 0 | 0 | 0 | 0 | 0 | 0 | 0 | 0 | 0 | 0 | 0 | 0 | 0 | 0 | 0 | 0 | 0 | 0 | 0 | 0 | 0 | 0 | 0 | 0 | 0 | 0 | 0 | 0    | 0 | 0 | 0 | 0     | 0 | 0 | 0 |
| 69.0170 | 13.8356 | -11.8099 | C | 0 | 0 | 0 | 0 | 0 | 0 | 0 | 0 | 0 | 0 | 0 | 0 | 0 | 0 | 0 | 0 | 0 | 0 | 0 | 0 | 0 | 0 | 0 | 0 | 0 | 0 | 0 | 0 | 0    | 0 | 0 | 0 | 0     | 0 | 0 | 0 |
| 67.9609 | 14.4830 | -11.2409 | N | 0 | 0 | 0 | 0 | 0 | 0 | 0 | 0 | 0 | 0 | 0 | 0 | 0 | 0 | 0 | 0 | 0 | 0 | 0 | 0 | 0 | 0 | 0 | 0 | 0 | 0 | 0 | 0 | 0    | 0 | 0 | 0 | 0     | 0 | 0 | 0 |
| 68.2117 | 14.5791 | -9.8298  | C | 0 | 0 | 0 | 0 | 0 | 0 | 0 | 0 | 0 | 0 | 0 | 0 | 0 | 0 | 0 | 0 | 0 | 0 | 0 | 0 | 0 | 0 | 0 | 0 | 0 | 0 | 0 | 0 | 0    | 0 | 0 | 0 | 0     | 0 | 0 | 0 |
| 69.5460 | 13.9896 | -9.5743  | C | 0 | 0 | 0 | 0 | 0 | 0 | 0 | 0 | 0 | 0 | 0 | 0 | 0 | 0 | 0 | 0 | 0 | 0 | 0 | 0 | 0 | 0 | 0 | 0 | 0 | 0 | 0 | 0 | 0    | 0 | 0 | 0 | 0     | 0 | 0 | 0 |
| 67.3611 | 15.0452 | -8.8824  | C | 0 | 0 | 0 | 0 | 0 | 0 | 0 | 0 | 0 | 0 | 0 | 0 | 0 | 0 | 0 | 0 | 0 | 0 | 0 | 0 | 0 | 0 | 0 | 0 | 0 | 0 | 0 | 0 | 0    | 0 | 0 | 0 | 0     | 0 | 0 | 0 |
| 66.0134 | 15.4609 | -9.1062  | C | 0 | 0 | 0 | 0 | 0 | 0 | 0 | 0 | 0 | 0 | 0 | 0 | 0 | 0 | 0 | 0 | 0 | 0 | 0 | 0 | 0 | 0 | 0 | 0 | 0 | 0 | 0 | 0 | 0    | 0 | 0 | 0 | 0     | 0 | 0 | 0 |

|         |         |          |    |   |   |   |   |   |   |   |   |   |   |   |
|---------|---------|----------|----|---|---|---|---|---|---|---|---|---|---|---|
| 65.3824 | 15.5095 | -10.3253 | N  | 0 | 0 | 0 | 0 | 0 | 0 | 0 | 0 | 0 | 0 | 0 |
| 64.0234 | 15.8127 | -10.1026 | C  | 0 | 0 | 0 | 0 | 0 | 0 | 0 | 0 | 0 | 0 | 0 |
| 63.8387 | 16.0055 | -8.6819  | C  | 0 | 0 | 0 | 0 | 0 | 0 | 0 | 0 | 0 | 0 | 0 |
| 65.0624 | 15.7852 | -8.0688  | C  | 0 | 0 | 0 | 0 | 0 | 0 | 0 | 0 | 0 | 0 | 0 |
| 63.0124 | 15.8219 | -11.0714 | C  | 0 | 0 | 0 | 0 | 0 | 0 | 0 | 0 | 0 | 0 | 0 |
| 63.1968 | 15.5616 | -12.4130 | C  | 0 | 0 | 0 | 0 | 0 | 0 | 0 | 0 | 0 | 0 | 0 |
| 64.4826 | 15.3050 | -13.0039 | N  | 0 | 0 | 0 | 0 | 0 | 0 | 0 | 0 | 0 | 0 | 0 |
| 64.2707 | 15.0923 | -14.3107 | C  | 0 | 0 | 0 | 0 | 0 | 0 | 0 | 0 | 0 | 0 | 0 |
| 62.8589 | 15.1860 | -14.6312 | C  | 0 | 0 | 0 | 0 | 0 | 0 | 0 | 0 | 0 | 0 | 0 |
| 62.1830 | 15.4718 | -13.4649 | C  | 0 | 0 | 0 | 0 | 0 | 0 | 0 | 0 | 0 | 0 | 0 |
| 65.0864 | 14.7661 | -15.4505 | C  | 0 | 0 | 0 | 0 | 0 | 0 | 0 | 0 | 0 | 0 | 0 |
| 66.3957 | 14.4205 | -15.3182 | C  | 0 | 0 | 0 | 0 | 0 | 0 | 0 | 0 | 0 | 0 | 0 |
| 67.0528 | 14.4205 | -14.0474 | N  | 0 | 0 | 0 | 0 | 0 | 0 | 0 | 0 | 0 | 0 | 0 |
| 68.2305 | 13.7211 | -14.1564 | C  | 0 | 0 | 0 | 0 | 0 | 0 | 0 | 0 | 0 | 0 | 0 |
| 68.4526 | 13.1997 | -15.5650 | C  | 0 | 0 | 0 | 0 | 0 | 0 | 0 | 0 | 0 | 0 | 0 |
| 67.3231 | 13.8712 | -16.3865 | C  | 0 | 0 | 0 | 0 | 0 | 0 | 0 | 0 | 0 | 0 | 0 |
| 69.1561 | 13.4813 | -13.1588 | C  | 0 | 0 | 0 | 0 | 0 | 0 | 0 | 0 | 0 | 0 | 0 |
| 70.0919 | 13.9610 | -8.2379  | C  | 0 | 0 | 0 | 0 | 0 | 0 | 0 | 0 | 0 | 0 | 0 |
| 67.7197 | 15.0466 | -7.8369  | H  | 0 | 0 | 0 | 0 | 0 | 0 | 0 | 0 | 0 | 0 | 0 |
| 62.5791 | 16.3420 | -7.9813  | C  | 0 | 0 | 0 | 0 | 0 | 0 | 0 | 0 | 0 | 0 | 0 |
| 61.9892 | 16.0330 | -10.7220 | H  | 0 | 0 | 0 | 0 | 0 | 0 | 0 | 0 | 0 | 0 | 0 |
| 62.6920 | 14.9325 | -16.0600 | C  | 0 | 0 | 0 | 0 | 0 | 0 | 0 | 0 | 0 | 0 | 0 |
| 60.7361 | 15.6386 | -13.2777 | C  | 0 | 0 | 0 | 0 | 0 | 0 | 0 | 0 | 0 | 0 | 0 |
| 64.1499 | 14.7857 | -16.6594 | C  | 0 | 0 | 0 | 0 | 0 | 0 | 0 | 0 | 0 | 0 | 0 |
| 69.4593 | 13.5214 | -15.9278 | H  | 0 | 0 | 0 | 0 | 0 | 0 | 0 | 0 | 0 | 0 | 0 |
| 66.7770 | 13.1117 | -16.9993 | H  | 0 | 0 | 0 | 0 | 0 | 0 | 0 | 0 | 0 | 0 | 0 |
| 70.0772 | 12.9301 | -13.4140 | H  | 0 | 0 | 0 | 0 | 0 | 0 | 0 | 0 | 0 | 0 | 0 |
| 70.0240 | 13.5231 | -10.7692 | C  | 0 | 0 | 0 | 0 | 0 | 0 | 0 | 0 | 0 | 0 | 0 |
| 62.1524 | 17.7757 | -8.2193  | C  | 0 | 0 | 0 | 0 | 0 | 0 | 0 | 0 | 0 | 0 | 0 |
| 68.3774 | 11.6853 | -15.6247 | C  | 0 | 0 | 0 | 0 | 0 | 0 | 0 | 0 | 0 | 0 | 0 |
| 62.7366 | 16.1682 | -6.8914  | H  | 0 | 0 | 0 | 0 | 0 | 0 | 0 | 0 | 0 | 0 | 0 |
| 61.7785 | 15.6437 | -8.2955  | H  | 0 | 0 | 0 | 0 | 0 | 0 | 0 | 0 | 0 | 0 | 0 |
| 61.6718 | 14.8581 | -16.7063 | O  | 0 | 0 | 0 | 0 | 0 | 0 | 0 | 0 | 0 | 0 | 0 |
| 60.5073 | 16.3878 | -12.5076 | H  | 0 | 0 | 0 | 0 | 0 | 0 | 0 | 0 | 0 | 0 | 0 |
| 60.2834 | 14.6877 | -12.9619 | H  | 0 | 0 | 0 | 0 | 0 | 0 | 0 | 0 | 0 | 0 | 0 |
| 60.2425 | 15.9458 | -14.2090 | H  | 0 | 0 | 0 | 0 | 0 | 0 | 0 | 0 | 0 | 0 | 0 |
| 64.2527 | 13.4848 | -17.4586 | C  | 0 | 0 | 0 | 0 | 0 | 0 | 0 | 0 | 0 | 0 | 0 |
| 61.9570 | 17.9702 | -9.2825  | H  | 0 | 0 | 0 | 0 | 0 | 0 | 0 | 0 | 0 | 0 | 0 |
| 62.9232 | 18.4862 | -7.8943  | H  | 0 | 0 | 0 | 0 | 0 | 0 | 0 | 0 | 0 | 0 | 0 |
| 61.2333 | 18.0100 | -7.6670  | H  | 0 | 0 | 0 | 0 | 0 | 0 | 0 | 0 | 0 | 0 | 0 |
| 71.2787 | 12.8219 | -11.0789 | C  | 0 | 0 | 0 | 0 | 0 | 0 | 0 | 0 | 0 | 0 | 0 |
| 71.3793 | 11.9008 | -10.4882 | H  | 0 | 0 | 0 | 0 | 0 | 0 | 0 | 0 | 0 | 0 | 0 |
| 71.3116 | 12.5448 | -12.1470 | H  | 0 | 0 | 0 | 0 | 0 | 0 | 0 | 0 | 0 | 0 | 0 |
| 67.8671 | 14.9698 | -17.3019 | C  | 0 | 0 | 0 | 0 | 0 | 0 | 0 | 0 | 0 | 0 | 0 |
| 68.7023 | 15.5112 | -16.8132 | H  | 0 | 0 | 0 | 0 | 0 | 0 | 0 | 0 | 0 | 0 | 0 |
| 67.0778 | 15.7382 | -17.4577 | H  | 0 | 0 | 0 | 0 | 0 | 0 | 0 | 0 | 0 | 0 | 0 |
| 67.3952 | 11.3075 | -15.3113 | H  | 0 | 0 | 0 | 0 | 0 | 0 | 0 | 0 | 0 | 0 | 0 |
| 69.1305 | 11.2287 | -14.9686 | H  | 0 | 0 | 0 | 0 | 0 | 0 | 0 | 0 | 0 | 0 | 0 |
| 68.5605 | 11.3254 | -16.6463 | H  | 0 | 0 | 0 | 0 | 0 | 0 | 0 | 0 | 0 | 0 | 0 |
| 69.3996 | 14.3572 | -7.4732  | H  | 0 | 0 | 0 | 0 | 0 | 0 | 0 | 0 | 0 | 0 | 0 |
| 71.2999 | 13.5172 | -7.8956  | C  | 0 | 0 | 0 | 0 | 0 | 0 | 0 | 0 | 0 | 0 | 0 |
| 66.3811 | 15.3359 | -12.2041 | Zn | 0 | 0 | 0 | 0 | 0 | 0 | 0 | 0 | 0 | 0 | 0 |
| 72.1530 | 13.4537 | -10.8688 | H  | 0 | 0 | 0 | 0 | 0 | 0 | 0 | 0 | 0 | 0 | 0 |
| 72.0222 | 13.1183 | -8.6025  | H  | 0 | 0 | 0 | 0 | 0 | 0 | 0 | 0 | 0 | 0 | 0 |

|         |         |          |   |   |   |   |   |   |   |   |   |   |   |   |
|---------|---------|----------|---|---|---|---|---|---|---|---|---|---|---|---|
| 71.6448 | 13.5259 | -6.8660  | H | 0 | 0 | 0 | 0 | 0 | 0 | 0 | 0 | 0 | 0 | 0 |
| 65.3281 | 15.8408 | -6.6226  | C | 0 | 0 | 0 | 0 | 0 | 0 | 0 | 0 | 0 | 0 | 0 |
| 72.6060 | 14.9508 | -18.1897 | H | 0 | 0 | 0 | 0 | 0 | 0 | 0 | 0 | 0 | 0 | 0 |
| 65.9981 | 16.6732 | -6.3705  | H | 0 | 0 | 0 | 0 | 0 | 0 | 0 | 0 | 0 | 0 | 0 |
| 64.3819 | 15.9846 | -6.0732  | H | 0 | 0 | 0 | 0 | 0 | 0 | 0 | 0 | 0 | 0 | 0 |
| 65.7950 | 14.9146 | -6.2624  | H | 0 | 0 | 0 | 0 | 0 | 0 | 0 | 0 | 0 | 0 | 0 |
| 66.9925 | 17.3280 | -12.5590 | N | 0 | 0 | 0 | 0 | 0 | 0 | 0 | 0 | 0 | 0 | 0 |
| 63.8078 | 12.3866 | -16.7833 | O | 0 | 0 | 0 | 0 | 0 | 0 | 0 | 0 | 0 | 0 | 0 |
| 63.8471 | 11.1315 | -17.4293 | C | 0 | 0 | 0 | 0 | 0 | 0 | 0 | 0 | 0 | 0 | 0 |
| 64.6786 | 13.3429 | -18.5894 | O | 0 | 0 | 0 | 0 | 0 | 0 | 0 | 0 | 0 | 0 | 0 |
| 63.2399 | 11.1192 | -18.3408 | H | 0 | 0 | 0 | 0 | 0 | 0 | 0 | 0 | 0 | 0 | 0 |
| 63.4172 | 10.4693 | -16.6735 | H | 0 | 0 | 0 | 0 | 0 | 0 | 0 | 0 | 0 | 0 | 0 |
| 64.8748 | 10.8323 | -17.6627 | H | 0 | 0 | 0 | 0 | 0 | 0 | 0 | 0 | 0 | 0 | 0 |
| 66.9402 | 17.8900 | -13.7981 | C | 0 | 0 | 0 | 0 | 0 | 0 | 0 | 0 | 0 | 0 | 0 |
| 67.4600 | 18.0563 | -11.5085 | C | 0 | 0 | 0 | 0 | 0 | 0 | 0 | 0 | 0 | 0 | 0 |
| 67.3577 | 19.2081 | -14.0195 | C | 0 | 0 | 0 | 0 | 0 | 0 | 0 | 0 | 0 | 0 | 0 |
| 67.8844 | 19.3754 | -11.6759 | C | 0 | 0 | 0 | 0 | 0 | 0 | 0 | 0 | 0 | 0 | 0 |
| 67.8308 | 19.9563 | -12.9380 | C | 0 | 0 | 0 | 0 | 0 | 0 | 0 | 0 | 0 | 0 | 0 |
| 68.1548 | 20.9942 | -13.0818 | H | 0 | 0 | 0 | 0 | 0 | 0 | 0 | 0 | 0 | 0 | 0 |
| 68.2507 | 19.9437 | -10.8141 | H | 0 | 0 | 0 | 0 | 0 | 0 | 0 | 0 | 0 | 0 | 0 |
| 67.4790 | 17.5520 | -10.5279 | H | 0 | 0 | 0 | 0 | 0 | 0 | 0 | 0 | 0 | 0 | 0 |
| 66.5473 | 17.2558 | -14.6119 | H | 0 | 0 | 0 | 0 | 0 | 0 | 0 | 0 | 0 | 0 | 0 |
| 67.3414 | 19.8326 | -15.3867 | C | 0 | 0 | 0 | 0 | 0 | 0 | 0 | 0 | 0 | 0 | 0 |
| 66.1203 | 19.5627 | -16.0575 | O | 0 | 0 | 0 | 0 | 0 | 0 | 0 | 0 | 0 | 0 | 0 |
| 66.1050 | 18.7924 | -17.1919 | C | 0 | 0 | 0 | 0 | 0 | 0 | 0 | 0 | 0 | 0 | 0 |
| 68.2441 | 19.5148 | -15.9470 | H | 0 | 0 | 0 | 0 | 0 | 0 | 0 | 0 | 0 | 0 | 0 |
| 67.3492 | 20.9366 | -15.3200 | H | 0 | 0 | 0 | 0 | 0 | 0 | 0 | 0 | 0 | 0 | 0 |
| 67.1562 | 18.4433 | -17.6890 | O | 0 | 0 | 0 | 0 | 0 | 0 | 0 | 0 | 0 | 0 | 0 |
| 64.7010 | 18.5032 | -17.6766 | C | 0 | 0 | 0 | 0 | 0 | 0 | 0 | 0 | 0 | 0 | 0 |
| 64.0979 | 17.3263 | -16.9202 | C | 0 | 0 | 0 | 0 | 0 | 0 | 0 | 0 | 0 | 0 | 0 |
| 64.4192 | 15.9902 | -17.5768 | C | 0 | 0 | 0 | 0 | 0 | 0 | 0 | 0 | 0 | 0 | 0 |
| 64.0695 | 19.4044 | -17.5438 | H | 0 | 0 | 0 | 0 | 0 | 0 | 0 | 0 | 0 | 0 | 0 |
| 62.9978 | 17.4559 | -16.8670 | H | 0 | 0 | 0 | 0 | 0 | 0 | 0 | 0 | 0 | 0 | 0 |
| 64.4434 | 17.3271 | -15.8649 | H | 0 | 0 | 0 | 0 | 0 | 0 | 0 | 0 | 0 | 0 | 0 |
| 63.8219 | 15.8835 | -18.5059 | H | 0 | 0 | 0 | 0 | 0 | 0 | 0 | 0 | 0 | 0 | 0 |
| 65.4816 | 15.9709 | -17.9039 | H | 0 | 0 | 0 | 0 | 0 | 0 | 0 | 0 | 0 | 0 | 0 |
| 64.7223 | 18.3032 | -18.7668 | H | 0 | 0 | 0 | 0 | 0 | 0 | 0 | 0 | 0 | 0 | 0 |
| 1       | 2       | 1        | 0 | 0 | 0 | 0 |   |   |   |   |   |   |   |   |
| 1       | 5       | 1        | 0 | 0 | 0 | 0 |   |   |   |   |   |   |   |   |
| 1       | 6       | 1        | 0 | 0 | 0 | 0 |   |   |   |   |   |   |   |   |
| 1       | 59      | 1        | 0 | 0 | 0 | 0 |   |   |   |   |   |   |   |   |
| 2       | 3       | 1        | 0 | 0 | 0 | 0 |   |   |   |   |   |   |   |   |
| 2       | 4       | 2        | 0 | 0 | 0 | 0 |   |   |   |   |   |   |   |   |
| 3       | 7       | 1        | 0 | 0 | 0 | 0 |   |   |   |   |   |   |   |   |
| 7       | 8       | 1        | 0 | 0 | 0 | 0 |   |   |   |   |   |   |   |   |
| 7       | 9       | 1        | 0 | 0 | 0 | 0 |   |   |   |   |   |   |   |   |
| 7       | 72      | 1        | 0 | 0 | 0 | 0 |   |   |   |   |   |   |   |   |
| 10      | 11      | 1        | 0 | 0 | 0 | 0 |   |   |   |   |   |   |   |   |
| 10      | 32      | 1        | 0 | 0 | 0 | 0 |   |   |   |   |   |   |   |   |
| 10      | 43      | 2        | 0 | 0 | 0 | 0 |   |   |   |   |   |   |   |   |
| 11      | 12      | 1        | 0 | 0 | 0 | 0 |   |   |   |   |   |   |   |   |
| 11      | 67      | 1        | 0 | 0 | 0 | 0 |   |   |   |   |   |   |   |   |
| 12      | 13      | 2        | 0 | 0 | 0 | 0 |   |   |   |   |   |   |   |   |
| 12      | 14      | 1        | 0 | 0 | 0 | 0 |   |   |   |   |   |   |   |   |



|       |   |   |   |   |   |
|-------|---|---|---|---|---|
| 13 33 | 1 | 0 | 0 | 0 | 0 |
| 13 43 | 1 | 0 | 0 | 0 | 0 |
| 14 15 | 2 | 0 | 0 | 0 | 0 |
| 14 34 | 1 | 0 | 0 | 0 | 0 |
| 15 16 | 1 | 0 | 0 | 0 | 0 |
| 15 19 | 1 | 0 | 0 | 0 | 0 |
| 16 17 | 2 | 0 | 0 | 0 | 0 |
| 16 67 | 1 | 0 | 0 | 0 | 0 |
| 17 18 | 1 | 0 | 0 | 0 | 0 |
| 17 20 | 1 | 0 | 0 | 0 | 0 |
| 18 19 | 2 | 0 | 0 | 0 | 0 |
| 18 35 | 1 | 0 | 0 | 0 | 0 |
| 19 71 | 1 | 0 | 0 | 0 | 0 |
| 20 21 | 2 | 0 | 0 | 0 | 0 |
| 20 36 | 1 | 0 | 0 | 0 | 0 |
| 21 22 | 1 | 0 | 0 | 0 | 0 |
| 21 25 | 1 | 0 | 0 | 0 | 0 |
| 22 23 | 1 | 0 | 0 | 0 | 0 |
| 22 67 | 1 | 0 | 0 | 0 | 0 |
| 23 24 | 1 | 0 | 0 | 0 | 0 |
| 23 26 | 2 | 0 | 0 | 0 | 0 |
| 24 25 | 2 | 0 | 0 | 0 | 0 |
| 24 37 | 1 | 0 | 0 | 0 | 0 |
| 25 38 | 1 | 0 | 0 | 0 | 0 |
| 26 27 | 1 | 0 | 0 | 0 | 0 |
| 26 39 | 1 | 0 | 0 | 0 | 0 |
| 27 28 | 2 | 0 | 0 | 0 | 0 |
| 27 31 | 1 | 0 | 0 | 0 | 0 |
| 28 29 | 1 | 0 | 0 | 0 | 0 |
| 28 67 | 1 | 0 | 0 | 0 | 0 |
| 29 30 | 1 | 0 | 0 | 0 | 0 |
| 29 32 | 2 | 0 | 0 | 0 | 0 |
| 30 31 | 1 | 0 | 0 | 0 | 0 |
| 30 40 | 1 | 0 | 0 | 0 | 0 |
| 30 45 | 1 | 0 | 0 | 0 | 0 |
| 31 41 | 1 | 0 | 0 | 0 | 0 |
| 31 59 | 1 | 0 | 0 | 0 | 0 |
| 32 42 | 1 | 0 | 0 | 0 | 0 |
| 33 65 | 1 | 0 | 0 | 0 | 0 |
| 33 66 | 2 | 0 | 0 | 0 | 0 |
| 35 44 | 1 | 0 | 0 | 0 | 0 |
| 35 46 | 1 | 0 | 0 | 0 | 0 |
| 35 47 | 1 | 0 | 0 | 0 | 0 |
| 37 39 | 1 | 0 | 0 | 0 | 0 |
| 37 48 | 2 | 0 | 0 | 0 | 0 |
| 38 49 | 1 | 0 | 0 | 0 | 0 |
| 38 50 | 1 | 0 | 0 | 0 | 0 |
| 38 51 | 1 | 0 | 0 | 0 | 0 |
| 39 52 | 1 | 0 | 0 | 0 | 0 |
| 39100 | 1 | 0 | 0 | 0 | 0 |
| 43 56 | 1 | 0 | 0 | 0 | 0 |
| 44 53 | 1 | 0 | 0 | 0 | 0 |
| 44 54 | 1 | 0 | 0 | 0 | 0 |
| 44 55 | 1 | 0 | 0 | 0 | 0 |

```
45 62 1 0 0 0 0
45 63 1 0 0 0 0
45 64 1 0 0 0 0
52 77 1 0 0 0 0
52 79 2 0 0 0 0
56 57 1 0 0 0 0
56 58 1 0 0 0 0
56 68 1 0 0 0 0
59 60 1 0 0 0 0
59 61 1 0 0 0 0
66 69 1 0 0 0 0
66 70 1 0 0 0 0
67 76 1 0 0 0 0
71 73 1 0 0 0 0
71 74 1 0 0 0 0
71 75 1 0 0 0 0
76 83 2 0 0 0 0
76 84 1 0 0 0 0
77 78 1 0 0 0 0
78 80 1 0 0 0 0
78 81 1 0 0 0 0
78 82 1 0 0 0 0
83 85 1 0 0 0 0
83 91 1 0 0 0 0
84 86 2 0 0 0 0
84 90 1 0 0 0 0
85 87 2 0 0 0 0
85 92 1 0 0 0 0
86 87 1 0 0 0 0
86 89 1 0 0 0 0
87 88 1 0 0 0 0
92 93 1 0 0 0 0
92 95 1 0 0 0 0
92 96 1 0 0 0 0
93 94 1 0 0 0 0
94 97 2 0 0 0 0
94 98 1 0 0 0 0
98 99 1 0 0 0 0
98101 1 0 0 0 0
98106 1 0 0 0 0
99100 1 0 0 0 0
99102 1 0 0 0 0
99103 1 0 0 0 0
100104 1 0 0 0 0
100105 1 0 0 0 0
M END
```

---

<sup>a</sup> The MM+/PM3 calculations were performed until the RMS gradient reached a value below 0.01 kcal Å<sup>-1</sup> mol<sup>-1</sup> by using Polak-Ribiere algorithm.

**Table S6.** Optimized molecular configuration image and its Cartesian coordinates of **Zn-4'(C<sub>3,1</sub>)** (MM+/PM3).<sup>a</sup>

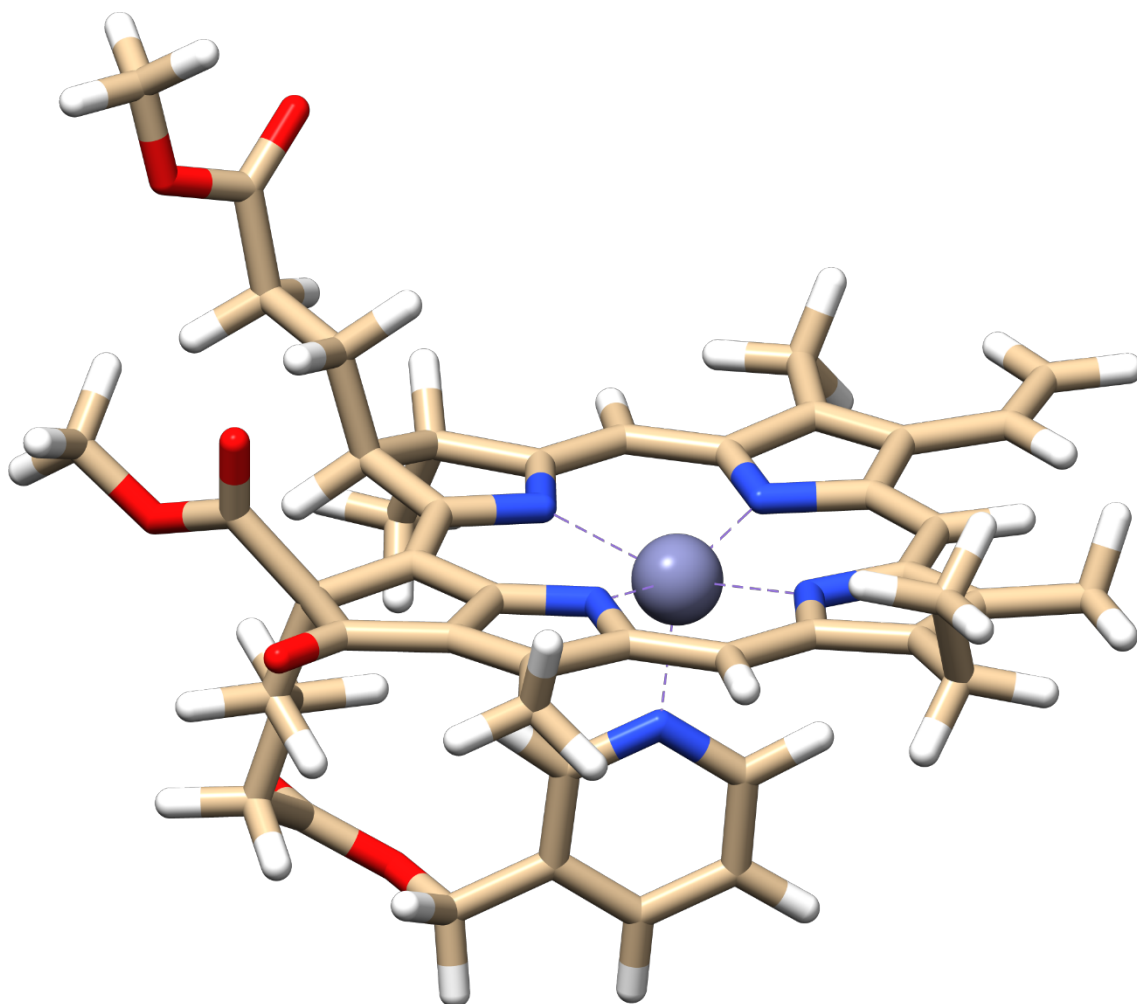


---

|         |         |          |   |   |   |   |   |   |      |       |   |   |   |   |   |   |   |   |   |
|---------|---------|----------|---|---|---|---|---|---|------|-------|---|---|---|---|---|---|---|---|---|
| 106116  | 0       | 0        | 0 | 0 | 0 | 0 | 0 | 0 | 0999 | V2000 |   |   |   |   |   |   |   |   |   |
| 69.8812 | 15.3447 | -16.4758 | C | 0 | 0 | 0 | 0 | 0 | 0    | 0     | 0 | 0 | 0 | 0 | 0 | 0 | 0 | 0 | 0 |
| 71.2074 | 15.9465 | -16.0727 | C | 0 | 0 | 0 | 0 | 0 | 0    | 0     | 0 | 0 | 0 | 0 | 0 | 0 | 0 | 0 | 0 |
| 71.6478 | 16.9099 | -16.9381 | O | 0 | 0 | 0 | 0 | 0 | 0    | 0     | 0 | 0 | 0 | 0 | 0 | 0 | 0 | 0 | 0 |
| 71.8911 | 15.6611 | -15.1100 | O | 0 | 0 | 0 | 0 | 0 | 0    | 0     | 0 | 0 | 0 | 0 | 0 | 0 | 0 | 0 | 0 |
| 69.7950 | 15.2939 | -17.5801 | H | 0 | 0 | 0 | 0 | 0 | 0    | 0     | 0 | 0 | 0 | 0 | 0 | 0 | 0 | 0 | 0 |
| 69.8245 | 14.2951 | -16.1060 | H | 0 | 0 | 0 | 0 | 0 | 0    | 0     | 0 | 0 | 0 | 0 | 0 | 0 | 0 | 0 | 0 |
| 72.8377 | 17.6044 | -16.6340 | C | 0 | 0 | 0 | 0 | 0 | 0    | 0     | 0 | 0 | 0 | 0 | 0 | 0 | 0 | 0 | 0 |
| 73.7055 | 16.9364 | -16.6258 | H | 0 | 0 | 0 | 0 | 0 | 0    | 0     | 0 | 0 | 0 | 0 | 0 | 0 | 0 | 0 | 0 |
| 72.7691 | 18.1332 | -15.6774 | H | 0 | 0 | 0 | 0 | 0 | 0    | 0     | 0 | 0 | 0 | 0 | 0 | 0 | 0 | 0 | 0 |
| 65.6391 | 13.6639 | -12.0071 | C | 0 | 0 | 0 | 0 | 0 | 0    | 0     | 0 | 0 | 0 | 0 | 0 | 0 | 0 | 0 | 0 |
| 64.7608 | 14.6686 | -11.7623 | N | 0 | 0 | 0 | 0 | 0 | 0    | 0     | 0 | 0 | 0 | 0 | 0 | 0 | 0 | 0 | 0 |
| 64.2206 | 14.4760 | -10.4453 | C | 0 | 0 | 0 | 0 | 0 | 0    | 0     | 0 | 0 | 0 | 0 | 0 | 0 | 0 | 0 | 0 |
| 64.8311 | 13.2467 | -9.8945  | C | 0 | 0 | 0 | 0 | 0 | 0    | 0     | 0 | 0 | 0 | 0 | 0 | 0 | 0 | 0 | 0 |
| 63.3414 | 15.2857 | -9.8026  | C | 0 | 0 | 0 | 0 | 0 | 0    | 0     | 0 | 0 | 0 | 0 | 0 | 0 | 0 | 0 | 0 |

|         |         |             |   |   |   |   |   |   |   |   |   |   |   |
|---------|---------|-------------|---|---|---|---|---|---|---|---|---|---|---|
| 62.8135 | 16.5123 | -10.3030 C  | 0 | 0 | 0 | 0 | 0 | 0 | 0 | 0 | 0 | 0 | 0 |
| 63.0724 | 17.0582 | -11.5406 N  | 0 | 0 | 0 | 0 | 0 | 0 | 0 | 0 | 0 | 0 | 0 |
| 62.4428 | 18.3142 | -11.6049 C  | 0 | 0 | 0 | 0 | 0 | 0 | 0 | 0 | 0 | 0 | 0 |
| 61.7456 | 18.5277 | -10.3581 C  | 0 | 0 | 0 | 0 | 0 | 0 | 0 | 0 | 0 | 0 | 0 |
| 61.9723 | 17.4173 | -9.5580 C   | 0 | 0 | 0 | 0 | 0 | 0 | 0 | 0 | 0 | 0 | 0 |
| 62.5194 | 19.2294 | -12.6685 C  | 0 | 0 | 0 | 0 | 0 | 0 | 0 | 0 | 0 | 0 | 0 |
| 63.2768 | 19.0586 | -13.8039 C  | 0 | 0 | 0 | 0 | 0 | 0 | 0 | 0 | 0 | 0 | 0 |
| 64.0888 | 17.8936 | -14.0422 N  | 0 | 0 | 0 | 0 | 0 | 0 | 0 | 0 | 0 | 0 | 0 |
| 64.6890 | 18.0762 | -15.2270 C  | 0 | 0 | 0 | 0 | 0 | 0 | 0 | 0 | 0 | 0 | 0 |
| 64.2962 | 19.3431 | -15.8197 C  | 0 | 0 | 0 | 0 | 0 | 0 | 0 | 0 | 0 | 0 | 0 |
| 63.4371 | 19.9671 | -14.9438 C  | 0 | 0 | 0 | 0 | 0 | 0 | 0 | 0 | 0 | 0 | 0 |
| 65.6280 | 17.3435 | -16.0263 C  | 0 | 0 | 0 | 0 | 0 | 0 | 0 | 0 | 0 | 0 | 0 |
| 66.2337 | 16.2141 | -15.5480 C  | 0 | 0 | 0 | 0 | 0 | 0 | 0 | 0 | 0 | 0 | 0 |
| 65.7934 | 15.5655 | -14.3672 N  | 0 | 0 | 0 | 0 | 0 | 0 | 0 | 0 | 0 | 0 | 0 |
| 66.4630 | 14.3543 | -14.2389 C  | 0 | 0 | 0 | 0 | 0 | 0 | 0 | 0 | 0 | 0 | 0 |
| 67.3448 | 14.0806 | -15.4428 C  | 0 | 0 | 0 | 0 | 0 | 0 | 0 | 0 | 0 | 0 | 0 |
| 67.3890 | 15.4493 | -16.1682 C  | 0 | 0 | 0 | 0 | 0 | 0 | 0 | 0 | 0 | 0 | 0 |
| 66.3995 | 13.4807 | -13.1839 C  | 0 | 0 | 0 | 0 | 0 | 0 | 0 | 0 | 0 | 0 | 0 |
| 64.4814 | 12.7829 | -8.5729 C   | 0 | 0 | 0 | 0 | 0 | 0 | 0 | 0 | 0 | 0 | 0 |
| 63.0300 | 14.9828 | -8.7855 H   | 0 | 0 | 0 | 0 | 0 | 0 | 0 | 0 | 0 | 0 | 0 |
| 60.9286 | 19.7015 | -9.9769 C   | 0 | 0 | 0 | 0 | 0 | 0 | 0 | 0 | 0 | 0 | 0 |
| 61.9376 | 20.1593 | -12.5675 H  | 0 | 0 | 0 | 0 | 0 | 0 | 0 | 0 | 0 | 0 | 0 |
| 64.9438 | 19.4555 | -17.1225 C  | 0 | 0 | 0 | 0 | 0 | 0 | 0 | 0 | 0 | 0 | 0 |
| 62.7963 | 21.2809 | -15.0831 C  | 0 | 0 | 0 | 0 | 0 | 0 | 0 | 0 | 0 | 0 | 0 |
| 65.6963 | 18.0722 | -17.3678 C  | 0 | 0 | 0 | 0 | 0 | 0 | 0 | 0 | 0 | 0 | 0 |
| 68.3758 | 13.7789 | -15.1186 H  | 0 | 0 | 0 | 0 | 0 | 0 | 0 | 0 | 0 | 0 | 0 |
| 67.2287 | 15.3380 | -17.2743 H  | 0 | 0 | 0 | 0 | 0 | 0 | 0 | 0 | 0 | 0 | 0 |
| 67.0026 | 12.5570 | -13.2147 H  | 0 | 0 | 0 | 0 | 0 | 0 | 0 | 0 | 0 | 0 | 0 |
| 65.6940 | 12.7577 | -10.8411 C  | 0 | 0 | 0 | 0 | 0 | 0 | 0 | 0 | 0 | 0 | 0 |
| 61.7782 | 20.9086 | -9.6367 C   | 0 | 0 | 0 | 0 | 0 | 0 | 0 | 0 | 0 | 0 | 0 |
| 66.7776 | 12.9823 | -16.3219 C  | 0 | 0 | 0 | 0 | 0 | 0 | 0 | 0 | 0 | 0 | 0 |
| 60.3107 | 19.4137 | -9.0948 H   | 0 | 0 | 0 | 0 | 0 | 0 | 0 | 0 | 0 | 0 | 0 |
| 60.2184 | 19.9457 | -10.7910 H  | 0 | 0 | 0 | 0 | 0 | 0 | 0 | 0 | 0 | 0 | 0 |
| 64.9101 | 20.3676 | -17.9165 O  | 0 | 0 | 0 | 0 | 0 | 0 | 0 | 0 | 0 | 0 | 0 |
| 61.7648 | 21.2711 | -14.7058 H  | 0 | 0 | 0 | 0 | 0 | 0 | 0 | 0 | 0 | 0 | 0 |
| 62.7734 | 21.6106 | -16.1300 H  | 0 | 0 | 0 | 0 | 0 | 0 | 0 | 0 | 0 | 0 | 0 |
| 63.3529 | 22.0357 | -14.5093 H  | 0 | 0 | 0 | 0 | 0 | 0 | 0 | 0 | 0 | 0 | 0 |
| 64.8529 | 17.3468 | -18.4416 C  | 0 | 0 | 0 | 0 | 0 | 0 | 0 | 0 | 0 | 0 | 0 |
| 67.1208 | 18.3899 | -17.8089 C  | 0 | 0 | 0 | 0 | 0 | 0 | 0 | 0 | 0 | 0 | 0 |
| 62.3787 | 21.2386 | -10.4952 H  | 0 | 0 | 0 | 0 | 0 | 0 | 0 | 0 | 0 | 0 | 0 |
| 62.4748 | 20.6935 | -8.8162 H   | 0 | 0 | 0 | 0 | 0 | 0 | 0 | 0 | 0 | 0 | 0 |
| 61.1531 | 21.7556 | -9.3265 H   | 0 | 0 | 0 | 0 | 0 | 0 | 0 | 0 | 0 | 0 | 0 |
| 66.5598 | 11.5697 | -10.8114 C  | 0 | 0 | 0 | 0 | 0 | 0 | 0 | 0 | 0 | 0 | 0 |
| 65.9766 | 10.6515 | -10.6549 H  | 0 | 0 | 0 | 0 | 0 | 0 | 0 | 0 | 0 | 0 | 0 |
| 67.1040 | 11.4660 | -11.7662 H  | 0 | 0 | 0 | 0 | 0 | 0 | 0 | 0 | 0 | 0 | 0 |
| 68.7248 | 16.1440 | -15.8897 C  | 0 | 0 | 0 | 0 | 0 | 0 | 0 | 0 | 0 | 0 | 0 |
| 68.8657 | 16.2697 | -14.7968 H  | 0 | 0 | 0 | 0 | 0 | 0 | 0 | 0 | 0 | 0 | 0 |
| 68.7205 | 17.1685 | -16.3092 H  | 0 | 0 | 0 | 0 | 0 | 0 | 0 | 0 | 0 | 0 | 0 |
| 65.8047 | 13.2579 | -16.7533 H  | 0 | 0 | 0 | 0 | 0 | 0 | 0 | 0 | 0 | 0 | 0 |
| 66.6365 | 12.0545 | -15.7519 H  | 0 | 0 | 0 | 0 | 0 | 0 | 0 | 0 | 0 | 0 | 0 |
| 67.4542 | 12.7621 | -17.1584 H  | 0 | 0 | 0 | 0 | 0 | 0 | 0 | 0 | 0 | 0 | 0 |
| 63.7520 | 13.4339 | -8.0582 H   | 0 | 0 | 0 | 0 | 0 | 0 | 0 | 0 | 0 | 0 | 0 |
| 64.9549 | 11.6901 | -7.9768 C   | 0 | 0 | 0 | 0 | 0 | 0 | 0 | 0 | 0 | 0 | 0 |
| 64.1163 | 16.0673 | -13.1024 Zn | 0 | 0 | 0 | 0 | 0 | 0 | 0 | 0 | 0 | 0 | 0 |

|         |         |          |   |   |   |   |   |   |   |   |   |   |   |   |
|---------|---------|----------|---|---|---|---|---|---|---|---|---|---|---|---|
| 67.3039 | 11.6372 | -10.0055 | H | 0 | 0 | 0 | 0 | 0 | 0 | 0 | 0 | 0 | 0 | 0 |
| 65.6728 | 11.0134 | -8.4323  | H | 0 | 0 | 0 | 0 | 0 | 0 | 0 | 0 | 0 | 0 | 0 |
| 64.6448 | 11.4008 | -6.9770  | H | 0 | 0 | 0 | 0 | 0 | 0 | 0 | 0 | 0 | 0 | 0 |
| 61.4428 | 17.2077 | -8.2013  | C | 0 | 0 | 0 | 0 | 0 | 0 | 0 | 0 | 0 | 0 | 0 |
| 72.9111 | 18.3167 | -17.4597 | H | 0 | 0 | 0 | 0 | 0 | 0 | 0 | 0 | 0 | 0 | 0 |
| 60.9456 | 16.2335 | -8.1073  | H | 0 | 0 | 0 | 0 | 0 | 0 | 0 | 0 | 0 | 0 | 0 |
| 62.2423 | 17.2494 | -7.4498  | H | 0 | 0 | 0 | 0 | 0 | 0 | 0 | 0 | 0 | 0 | 0 |
| 60.7073 | 17.9947 | -7.9615  | H | 0 | 0 | 0 | 0 | 0 | 0 | 0 | 0 | 0 | 0 | 0 |
| 67.8552 | 19.2415 | -17.3504 | O | 0 | 0 | 0 | 0 | 0 | 0 | 0 | 0 | 0 | 0 | 0 |
| 67.5856 | 17.6323 | -18.8525 | O | 0 | 0 | 0 | 0 | 0 | 0 | 0 | 0 | 0 | 0 | 0 |
| 68.8823 | 17.8863 | -19.3493 | C | 0 | 0 | 0 | 0 | 0 | 0 | 0 | 0 | 0 | 0 | 0 |
| 69.6488 | 17.6693 | -18.5953 | H | 0 | 0 | 0 | 0 | 0 | 0 | 0 | 0 | 0 | 0 | 0 |
| 68.9541 | 17.1811 | -20.1813 | H | 0 | 0 | 0 | 0 | 0 | 0 | 0 | 0 | 0 | 0 | 0 |
| 65.1470 | 17.6968 | -19.4514 | H | 0 | 0 | 0 | 0 | 0 | 0 | 0 | 0 | 0 | 0 | 0 |
| 68.9925 | 18.9149 | -19.7087 | H | 0 | 0 | 0 | 0 | 0 | 0 | 0 | 0 | 0 | 0 | 0 |
| 63.7936 | 17.6619 | -18.3200 | H | 0 | 0 | 0 | 0 | 0 | 0 | 0 | 0 | 0 | 0 | 0 |
| 64.9004 | 15.8298 | -18.3818 | C | 0 | 0 | 0 | 0 | 0 | 0 | 0 | 0 | 0 | 0 | 0 |
| 63.9677 | 15.2054 | -19.4093 | C | 0 | 0 | 0 | 0 | 0 | 0 | 0 | 0 | 0 | 0 | 0 |
| 64.5954 | 15.4923 | -17.3623 | H | 0 | 0 | 0 | 0 | 0 | 0 | 0 | 0 | 0 | 0 | 0 |
| 65.9449 | 15.4622 | -18.5062 | H | 0 | 0 | 0 | 0 | 0 | 0 | 0 | 0 | 0 | 0 | 0 |
| 63.6835 | 13.7669 | -19.0412 | C | 0 | 0 | 0 | 0 | 0 | 0 | 0 | 0 | 0 | 0 | 0 |
| 63.0096 | 15.7712 | -19.4617 | H | 0 | 0 | 0 | 0 | 0 | 0 | 0 | 0 | 0 | 0 | 0 |
| 64.4092 | 15.2520 | -20.4232 | H | 0 | 0 | 0 | 0 | 0 | 0 | 0 | 0 | 0 | 0 | 0 |
| 62.6317 | 13.3547 | -18.2660 | O | 0 | 0 | 0 | 0 | 0 | 0 | 0 | 0 | 0 | 0 | 0 |
| 64.3160 | 12.7837 | -19.3608 | O | 0 | 0 | 0 | 0 | 0 | 0 | 0 | 0 | 0 | 0 | 0 |
| 61.6808 | 14.2931 | -17.7848 | C | 0 | 0 | 0 | 0 | 0 | 0 | 0 | 0 | 0 | 0 | 0 |
| 60.7181 | 13.9309 | -18.1913 | H | 0 | 0 | 0 | 0 | 0 | 0 | 0 | 0 | 0 | 0 | 0 |
| 61.8536 | 15.3194 | -18.1784 | H | 0 | 0 | 0 | 0 | 0 | 0 | 0 | 0 | 0 | 0 | 0 |
| 61.6618 | 14.2980 | -16.2809 | C | 0 | 0 | 0 | 0 | 0 | 0 | 0 | 0 | 0 | 0 | 0 |
| 60.6516 | 13.6264 | -15.5889 | C | 0 | 0 | 0 | 0 | 0 | 0 | 0 | 0 | 0 | 0 | 0 |
| 60.6314 | 13.6747 | -14.1981 | C | 0 | 0 | 0 | 0 | 0 | 0 | 0 | 0 | 0 | 0 | 0 |
| 61.6209 | 14.3875 | -13.5190 | C | 0 | 0 | 0 | 0 | 0 | 0 | 0 | 0 | 0 | 0 | 0 |
| 62.6361 | 14.9905 | -15.5524 | C | 0 | 0 | 0 | 0 | 0 | 0 | 0 | 0 | 0 | 0 | 0 |
| 62.6126 | 15.0338 | -14.1915 | N | 0 | 0 | 0 | 0 | 0 | 0 | 0 | 0 | 0 | 0 | 0 |
| 63.4666 | 15.5242 | -16.0582 | H | 0 | 0 | 0 | 0 | 0 | 0 | 0 | 0 | 0 | 0 | 0 |
| 61.6431 | 14.4578 | -12.4199 | H | 0 | 0 | 0 | 0 | 0 | 0 | 0 | 0 | 0 | 0 | 0 |
| 59.8466 | 13.1586 | -13.6335 | H | 0 | 0 | 0 | 0 | 0 | 0 | 0 | 0 | 0 | 0 | 0 |
| 59.8820 | 13.0666 | -16.1349 | H | 0 | 0 | 0 | 0 | 0 | 0 | 0 | 0 | 0 | 0 | 0 |
| 1       | 2       | 1        | 0 | 0 | 0 | 0 |   |   |   |   |   |   |   |   |
| 1       | 5       | 1        | 0 | 0 | 0 | 0 |   |   |   |   |   |   |   |   |
| 1       | 6       | 1        | 0 | 0 | 0 | 0 |   |   |   |   |   |   |   |   |
| 1       | 60      | 1        | 0 | 0 | 0 | 0 |   |   |   |   |   |   |   |   |
| 2       | 3       | 1        | 0 | 0 | 0 | 0 |   |   |   |   |   |   |   |   |
| 2       | 4       | 2        | 0 | 0 | 0 | 0 |   |   |   |   |   |   |   |   |
| 3       | 7       | 1        | 0 | 0 | 0 | 0 |   |   |   |   |   |   |   |   |
| 7       | 8       | 1        | 0 | 0 | 0 | 0 |   |   |   |   |   |   |   |   |
| 7       | 9       | 1        | 0 | 0 | 0 | 0 |   |   |   |   |   |   |   |   |
| 7       | 73      | 1        | 0 | 0 | 0 | 0 |   |   |   |   |   |   |   |   |
| 10      | 11      | 1        | 0 | 0 | 0 | 0 |   |   |   |   |   |   |   |   |
| 10      | 32      | 1        | 0 | 0 | 0 | 0 |   |   |   |   |   |   |   |   |
| 10      | 43      | 2        | 0 | 0 | 0 | 0 |   |   |   |   |   |   |   |   |
| 11      | 12      | 1        | 0 | 0 | 0 | 0 |   |   |   |   |   |   |   |   |
| 11      | 68      | 1        | 0 | 0 | 0 | 0 |   |   |   |   |   |   |   |   |
| 12      | 13      | 2        | 0 | 0 | 0 | 0 |   |   |   |   |   |   |   |   |

|       |   |   |   |   |   |
|-------|---|---|---|---|---|
| 12 14 | 1 | 0 | 0 | 0 | 0 |
| 13 33 | 1 | 0 | 0 | 0 | 0 |
| 13 43 | 1 | 0 | 0 | 0 | 0 |
| 14 15 | 2 | 0 | 0 | 0 | 0 |
| 14 34 | 1 | 0 | 0 | 0 | 0 |
| 15 16 | 1 | 0 | 0 | 0 | 0 |
| 15 19 | 1 | 0 | 0 | 0 | 0 |
| 16 17 | 2 | 0 | 0 | 0 | 0 |
| 16 68 | 1 | 0 | 0 | 0 | 0 |
| 17 18 | 1 | 0 | 0 | 0 | 0 |
| 17 20 | 1 | 0 | 0 | 0 | 0 |
| 18 19 | 2 | 0 | 0 | 0 | 0 |
| 18 35 | 1 | 0 | 0 | 0 | 0 |
| 19 72 | 1 | 0 | 0 | 0 | 0 |
| 20 21 | 2 | 0 | 0 | 0 | 0 |
| 20 36 | 1 | 0 | 0 | 0 | 0 |
| 21 22 | 1 | 0 | 0 | 0 | 0 |
| 21 25 | 1 | 0 | 0 | 0 | 0 |
| 22 23 | 1 | 0 | 0 | 0 | 0 |
| 22 68 | 1 | 0 | 0 | 0 | 0 |
| 23 24 | 1 | 0 | 0 | 0 | 0 |
| 23 26 | 2 | 0 | 0 | 0 | 0 |
| 24 25 | 2 | 0 | 0 | 0 | 0 |
| 24 37 | 1 | 0 | 0 | 0 | 0 |
| 25 38 | 1 | 0 | 0 | 0 | 0 |
| 26 27 | 1 | 0 | 0 | 0 | 0 |
| 26 39 | 1 | 0 | 0 | 0 | 0 |
| 27 28 | 2 | 0 | 0 | 0 | 0 |
| 27 31 | 1 | 0 | 0 | 0 | 0 |
| 28 29 | 1 | 0 | 0 | 0 | 0 |
| 28 68 | 1 | 0 | 0 | 0 | 0 |
| 29 30 | 1 | 0 | 0 | 0 | 0 |
| 29 32 | 2 | 0 | 0 | 0 | 0 |
| 30 31 | 1 | 0 | 0 | 0 | 0 |
| 30 40 | 1 | 0 | 0 | 0 | 0 |
| 30 45 | 1 | 0 | 0 | 0 | 0 |
| 31 41 | 1 | 0 | 0 | 0 | 0 |
| 31 60 | 1 | 0 | 0 | 0 | 0 |
| 32 42 | 1 | 0 | 0 | 0 | 0 |
| 33 66 | 1 | 0 | 0 | 0 | 0 |
| 33 67 | 2 | 0 | 0 | 0 | 0 |
| 35 44 | 1 | 0 | 0 | 0 | 0 |
| 35 46 | 1 | 0 | 0 | 0 | 0 |
| 35 47 | 1 | 0 | 0 | 0 | 0 |
| 37 39 | 1 | 0 | 0 | 0 | 0 |
| 37 48 | 2 | 0 | 0 | 0 | 0 |
| 38 49 | 1 | 0 | 0 | 0 | 0 |
| 38 50 | 1 | 0 | 0 | 0 | 0 |
| 38 51 | 1 | 0 | 0 | 0 | 0 |
| 39 52 | 1 | 0 | 0 | 0 | 0 |
| 39 53 | 1 | 0 | 0 | 0 | 0 |
| 43 57 | 1 | 0 | 0 | 0 | 0 |
| 44 54 | 1 | 0 | 0 | 0 | 0 |
| 44 55 | 1 | 0 | 0 | 0 | 0 |

```
44 56 1 0 0 0 0
45 63 1 0 0 0 0
45 64 1 0 0 0 0
45 65 1 0 0 0 0
52 82 1 0 0 0 0
52 84 1 0 0 0 0
52 85 1 0 0 0 0
53 77 2 0 0 0 0
53 78 1 0 0 0 0
57 58 1 0 0 0 0
57 59 1 0 0 0 0
57 69 1 0 0 0 0
60 61 1 0 0 0 0
60 62 1 0 0 0 0
67 70 1 0 0 0 0
67 71 1 0 0 0 0
68102 1 0 0 0 0
72 74 1 0 0 0 0
72 75 1 0 0 0 0
72 76 1 0 0 0 0
78 79 1 0 0 0 0
79 80 1 0 0 0 0
79 81 1 0 0 0 0
79 83 1 0 0 0 0
85 86 1 0 0 0 0
85 87 1 0 0 0 0
85 88 1 0 0 0 0
86 89 1 0 0 0 0
86 90 1 0 0 0 0
86 91 1 0 0 0 0
89 92 1 0 0 0 0
89 93 2 0 0 0 0
92 94 1 0 0 0 0
94 95 1 0 0 0 0
94 96 1 0 0 0 0
94 97 1 0 0 0 0
97 98 1 0 0 0 0
97101 2 0 0 0 0
98 99 2 0 0 0 0
98106 1 0 0 0 0
99100 1 0 0 0 0
99105 1 0 0 0 0
100102 2 0 0 0 0
100104 1 0 0 0 0
101102 1 0 0 0 0
101103 1 0 0 0 0
M END
```

---

<sup>a</sup> The MM+/PM3 calculations were performed until the RMS gradient reached a value below 0.01 kcal Å<sup>-1</sup> mol<sup>-1</sup> by using Polak-Ribiere algorithm.

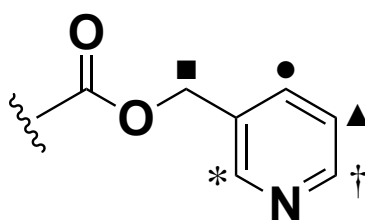

**Table S7.** Specific  $^1\text{H}$  NMR (600 MHz) spectral signals in the  $^{13}\text{C}$ -pyridine terminal of **Zn-4(C<sub>3,1</sub>)** in  $\text{CDCl}_3$  with/without pyridine- $d_5$ .

| Proton | $\delta$ / ppm          |                      | $ \Delta\delta $ / ppm <sup>a</sup> |
|--------|-------------------------|----------------------|-------------------------------------|
|        | Without pyridine- $d_5$ | With pyridine- $d_5$ |                                     |
| *      | 4.20                    | 6.94                 | 2.74                                |
| ■      | 4.26 / 4.17             | 4.67 / 4.63          | 0.41 / 0.46                         |
| ●      | 6.52                    | 7.17                 | 0.65                                |
| ▲      | 5.92                    | 6.71                 | 0.79                                |
| †      | 3.74                    | 6.79                 | 3.05                                |

$$^a |\Delta\delta| = |\delta[\text{without pyridine-}d_5] - \delta[\text{with pyridine-}d_5]|$$

**Table S8.** Specific  $^1\text{H}$  NMR (600 MHz) spectral signals in the  $^{13}\text{C}$ -pyridine terminal of **Zn-4'(C<sub>3,1</sub>)** in  $\text{CDCl}_3$  with/without pyridine- $d_5$ .

| Proton | $\delta$ / ppm          |                      | $ \Delta\delta $ / ppm <sup>a</sup> |
|--------|-------------------------|----------------------|-------------------------------------|
|        | Without pyridine- $d_5$ | With pyridine- $d_5$ |                                     |
| *      | 4.01                    | 7.07                 | 3.06                                |
| ■      | 4.31 / 4.13             | 4.74 / 4.69          | 0.43 / 0.56                         |
| ●      | 6.44                    | 7.20                 | 0.76                                |
| ▲      | 5.76                    | 6.73                 | 0.97                                |
| †      | 3.81–3.70               | 7.07                 | 3.26–3.37                           |

$$^a |\Delta\delta| = |\delta[\text{without pyridine-}d_5] - \delta[\text{with pyridine-}d_5]|$$



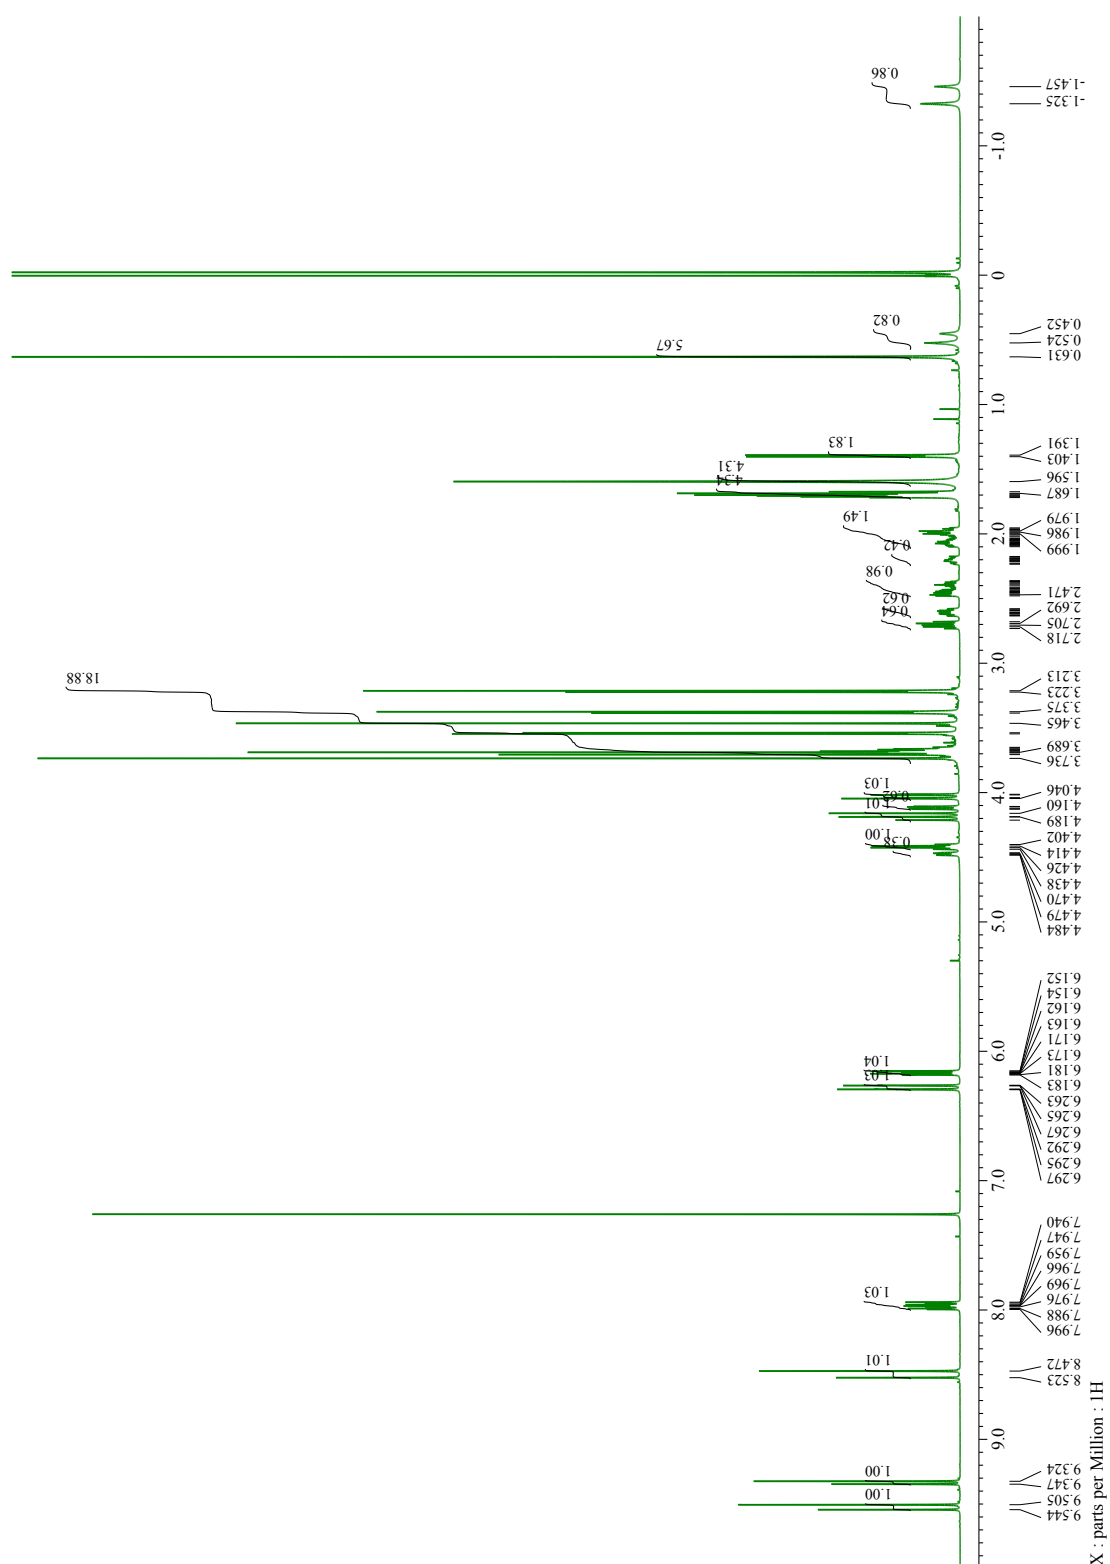

**Figure S1.** <sup>1</sup>H NMR (600 MHz) spectrum of methyl 13<sup>2</sup>-(*tert*-butoxycarbonylmethyl)-pheophorbides-*a/a'* [**H**<sub>2</sub>-2/2'(C<sub>1</sub>)] in CDCl<sub>3</sub>.

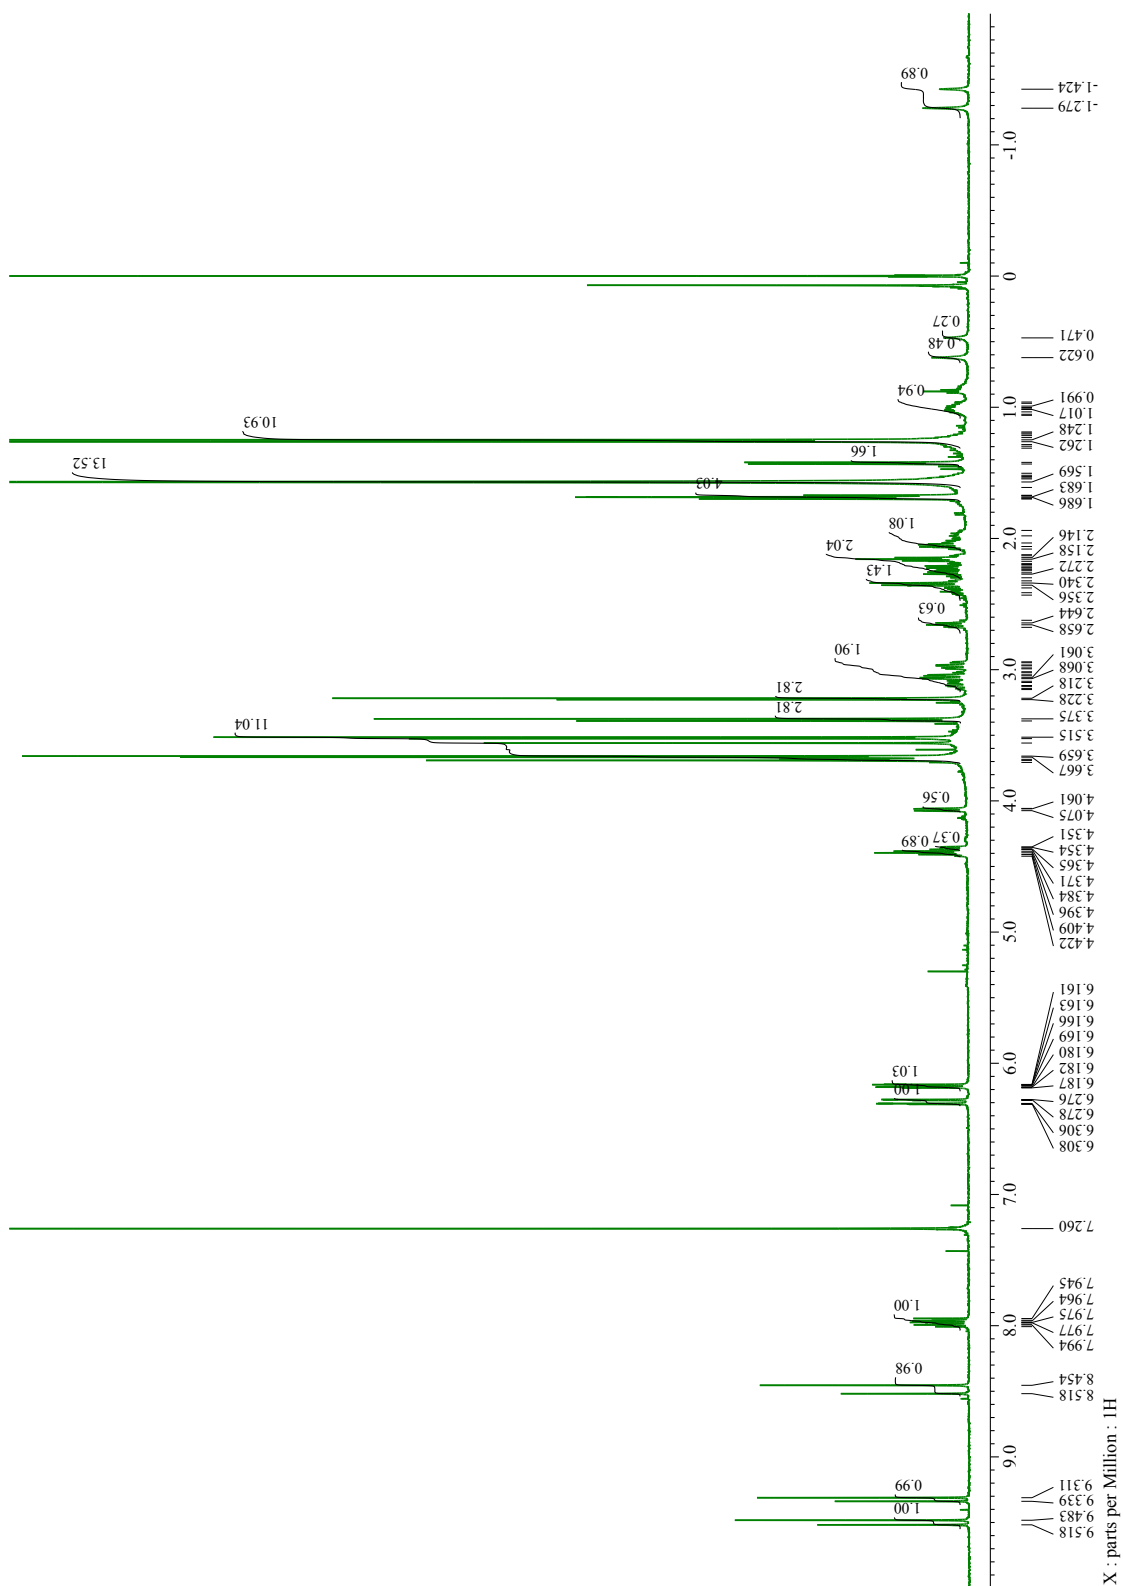

**Figure S2.** <sup>1</sup>H NMR (600 MHz) spectrum of methyl 13<sup>2</sup>-[3-(*tert*-butoxycarbonyl)propyl]pheophorbides-*a/a'* [**H<sub>2</sub>-2/2'(C<sub>3</sub>)**] in CDCl<sub>3</sub>.

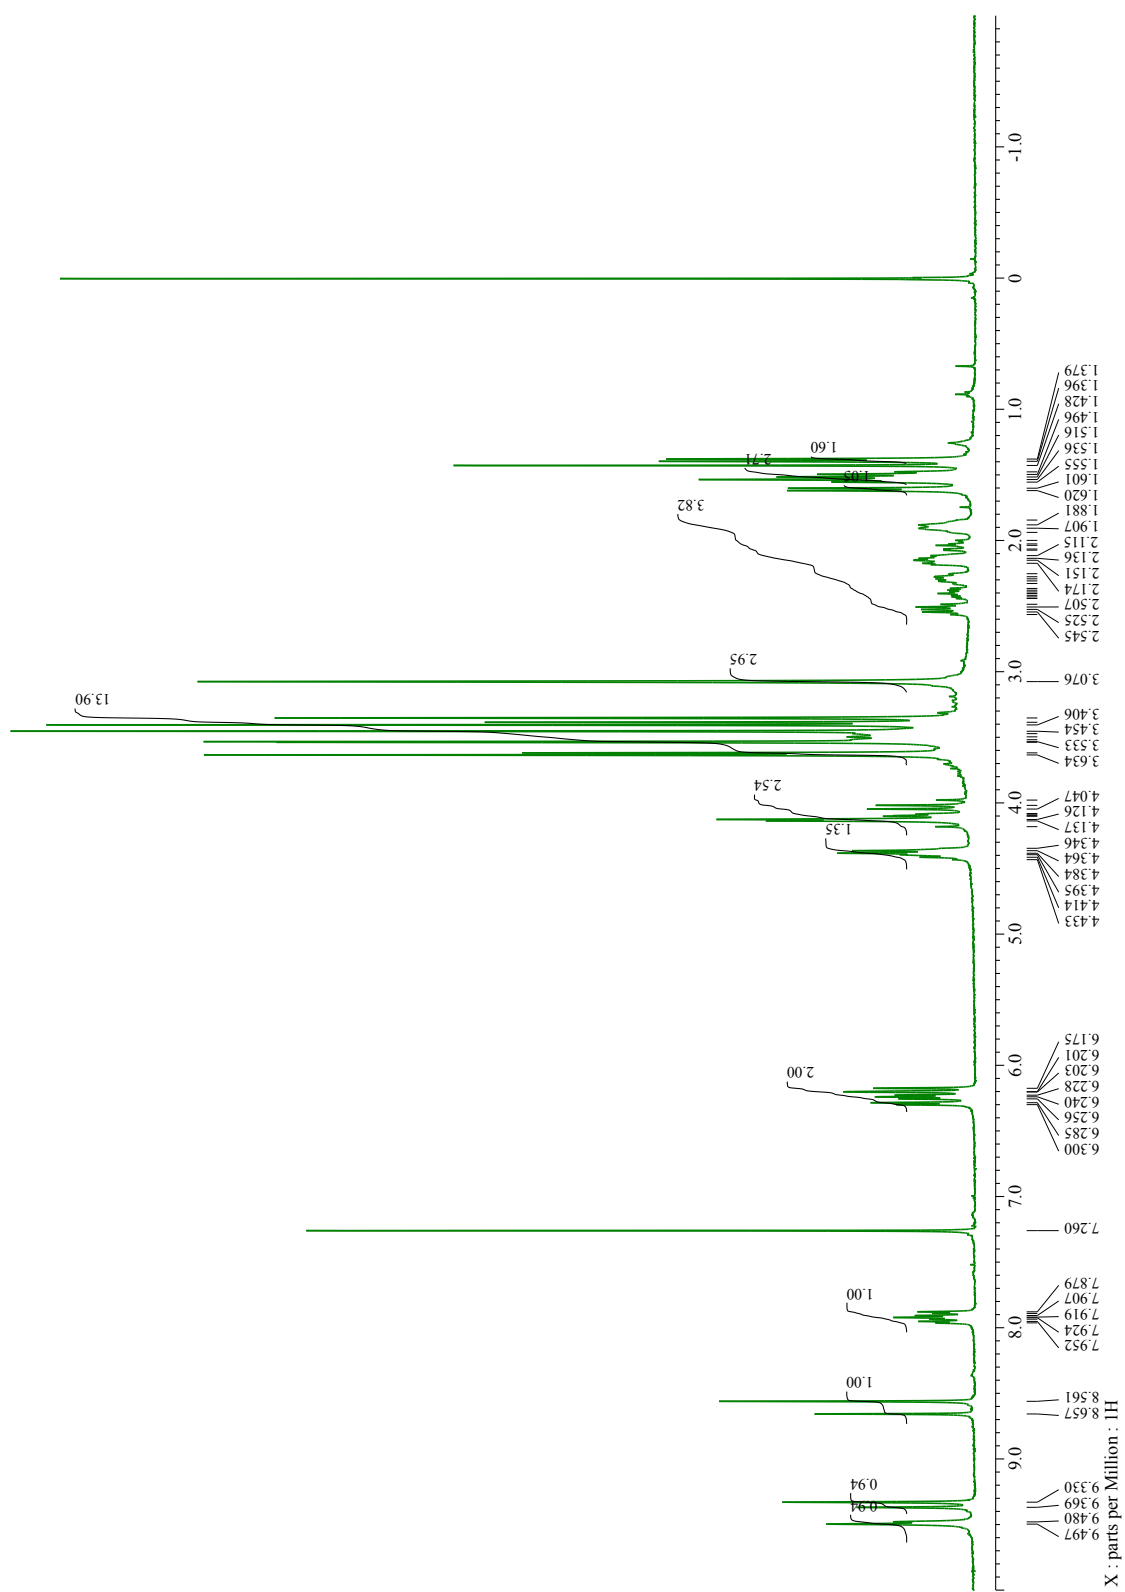

**Figure S3.** <sup>1</sup>H NMR (600 MHz) spectrum of methyl 13<sup>2</sup>-(carboxymethyl)pheophorbides-*a/a'* [H<sub>2</sub>-3/3'(C<sub>1</sub>)] in CDCl<sub>3</sub>.

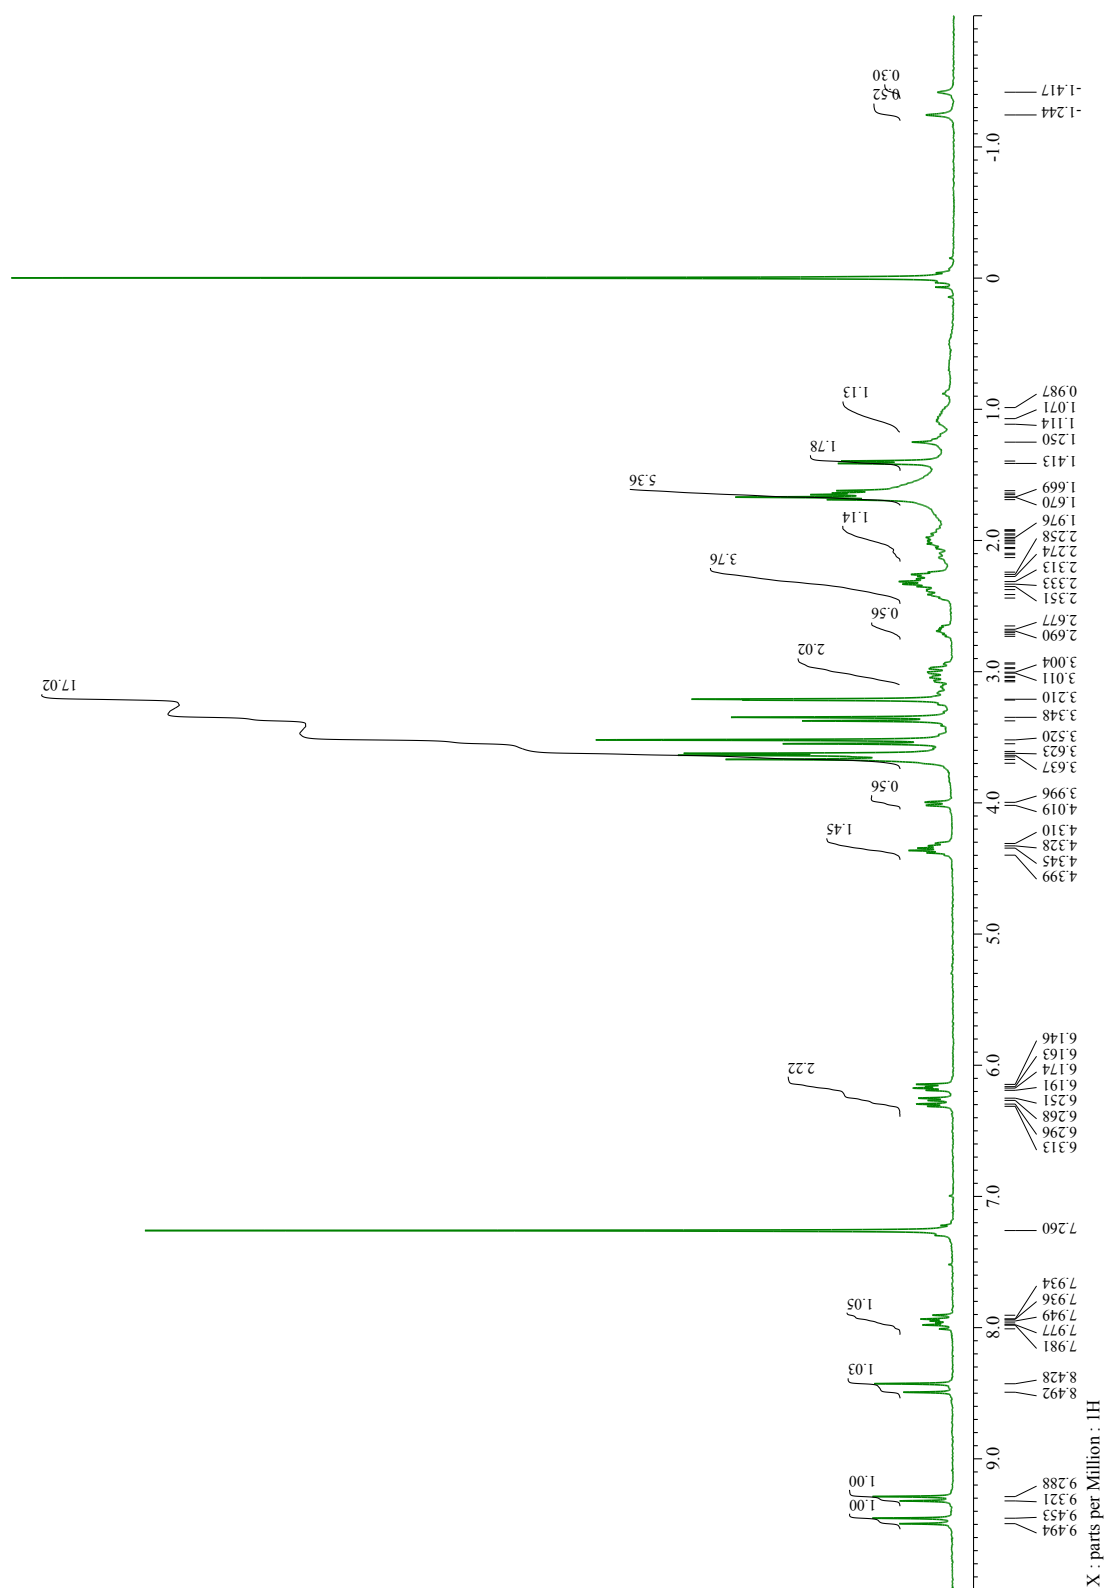

**Figure S4.**  $^1\text{H}$  NMR (600 MHz) spectrum of methyl 13<sup>2</sup>-(3-carboxypropyl)pheophorbides-*a/a'* [ $\text{H}_2\text{-3/3}'(\text{C}_3)$ ] in  $\text{CDCl}_3$ .

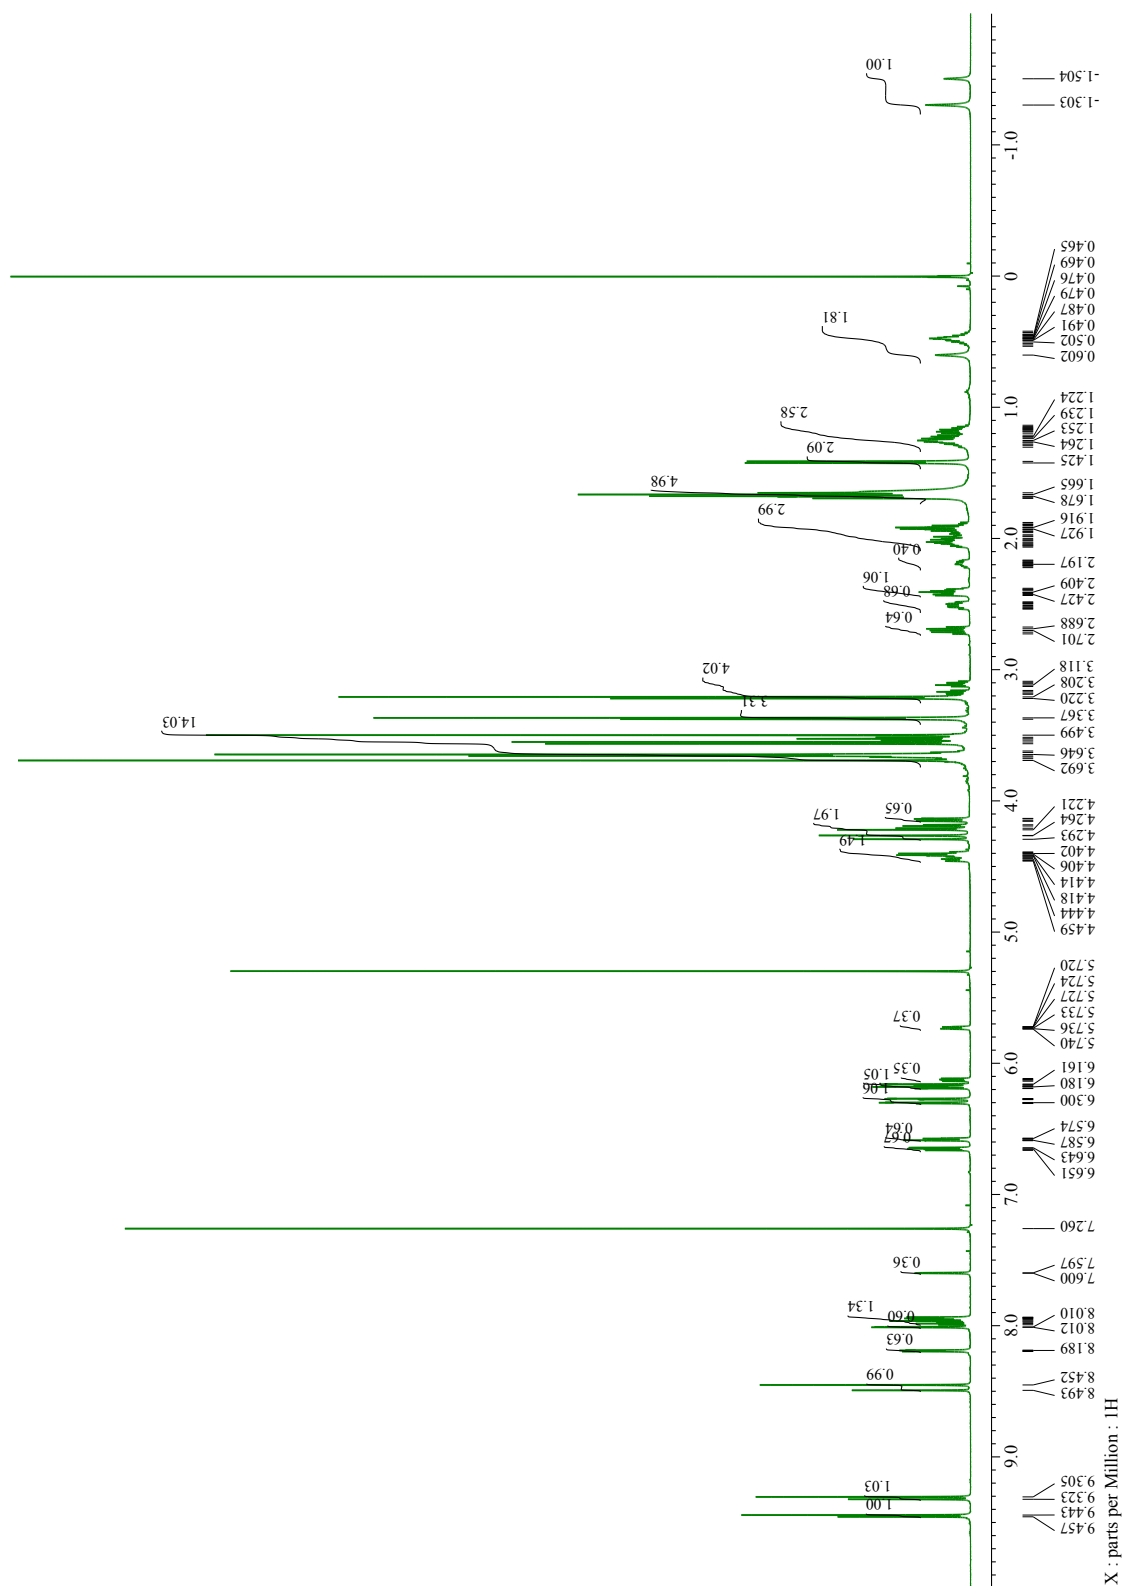

**Figure S5.** <sup>1</sup>H NMR (600 MHz) spectrum of methyl 13<sup>2</sup>-[3-(3-pyridyl)propyl]oxycarbonylmethyl]pheophorbides-*a/a'* [**H<sub>2</sub>-4/4'**(C<sub>1,3</sub>)] in CDCl<sub>3</sub>.

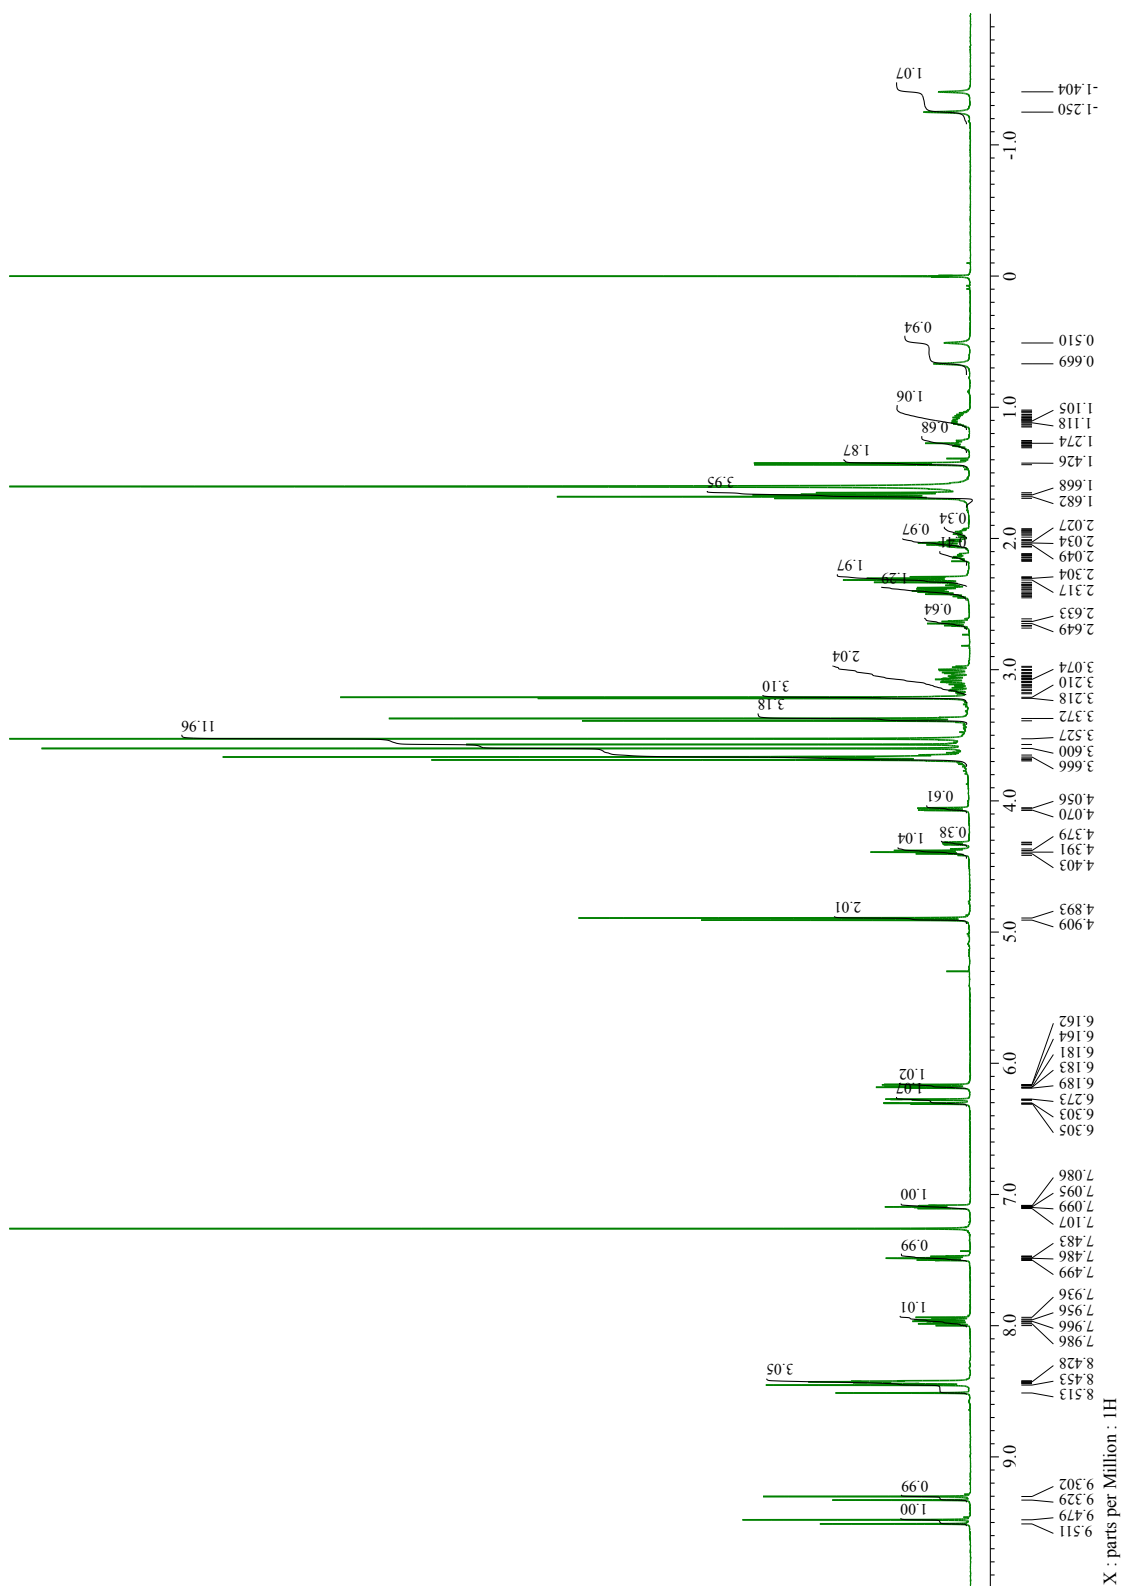

**Figure S6.** <sup>1</sup>H NMR (600 MHz) spectrum of methyl 13<sup>2</sup>-[3-((3-pyridyl)methoxy-carbonyl)propyl]pheophorbides-*a/a'* [**H**<sub>2</sub>-4/4'(C<sub>3,1</sub>)] in CDCl<sub>3</sub>.

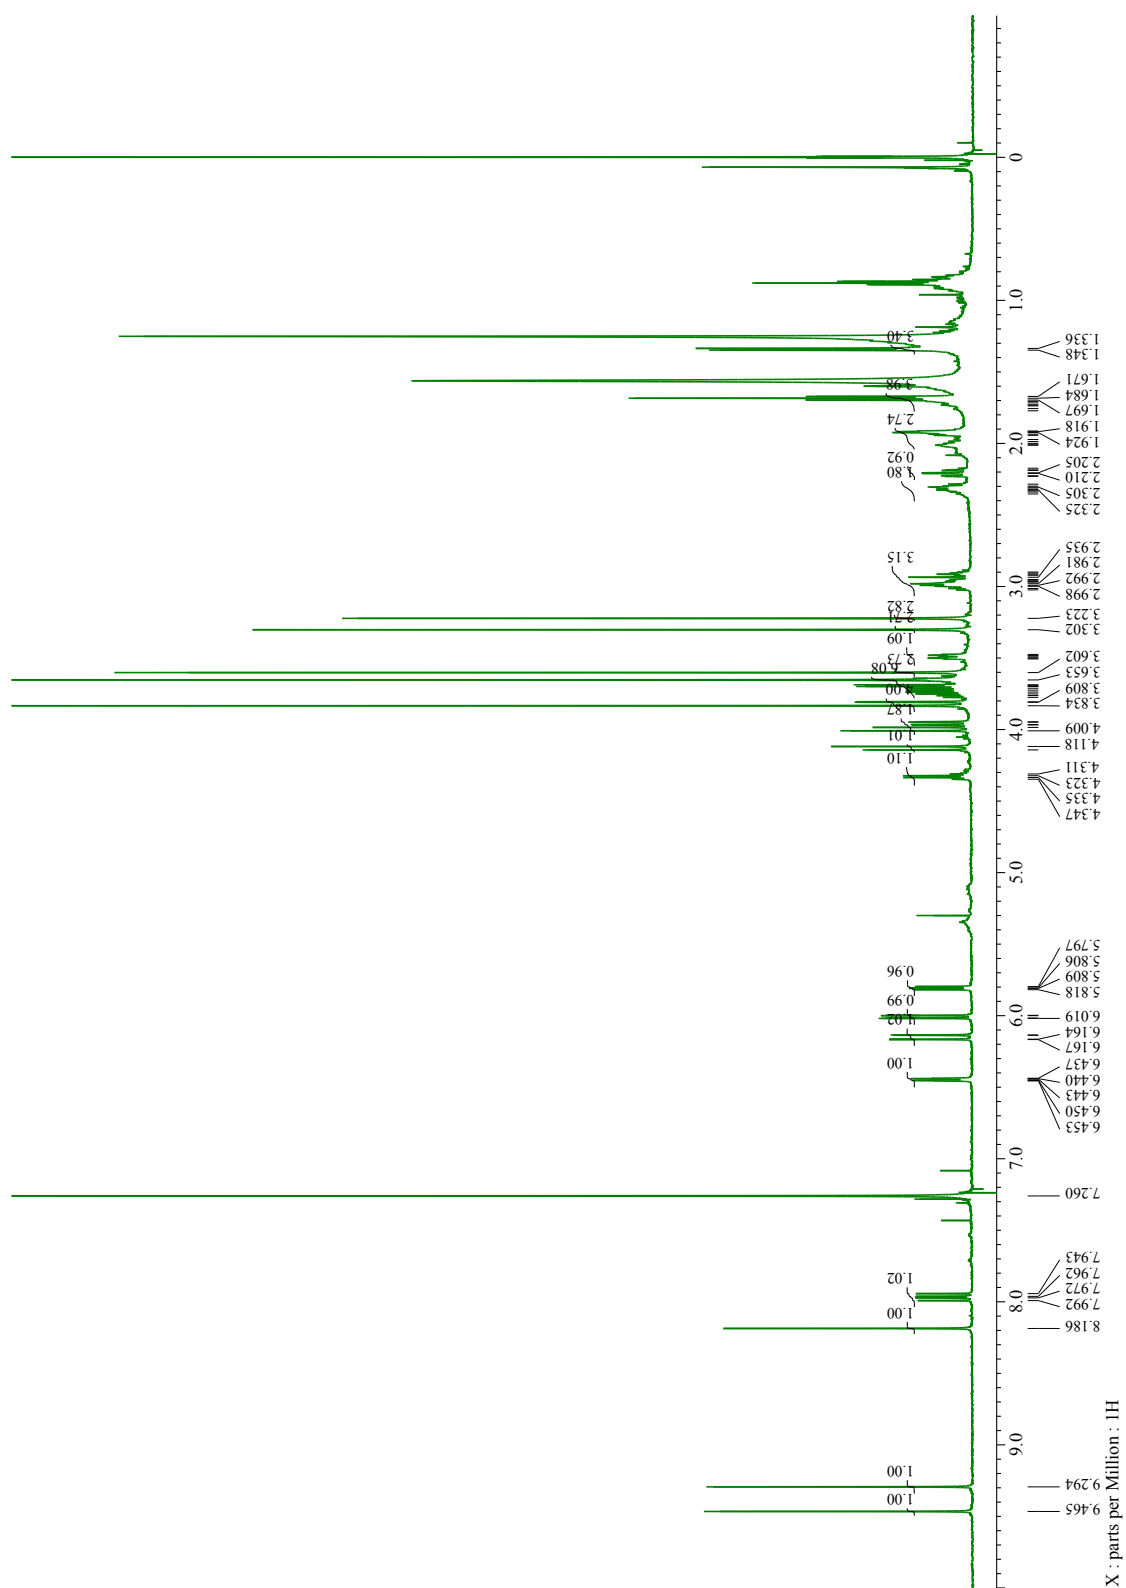

**Figure S7.** <sup>1</sup>H NMR (600 MHz) spectrum of zinc methyl 132-[{3-(3-pyridyl)propyl}oxycarbonylmethyl]pheophorbide-*a* [Zn-4(C<sub>1,3</sub>)] in CDCl<sub>3</sub>.

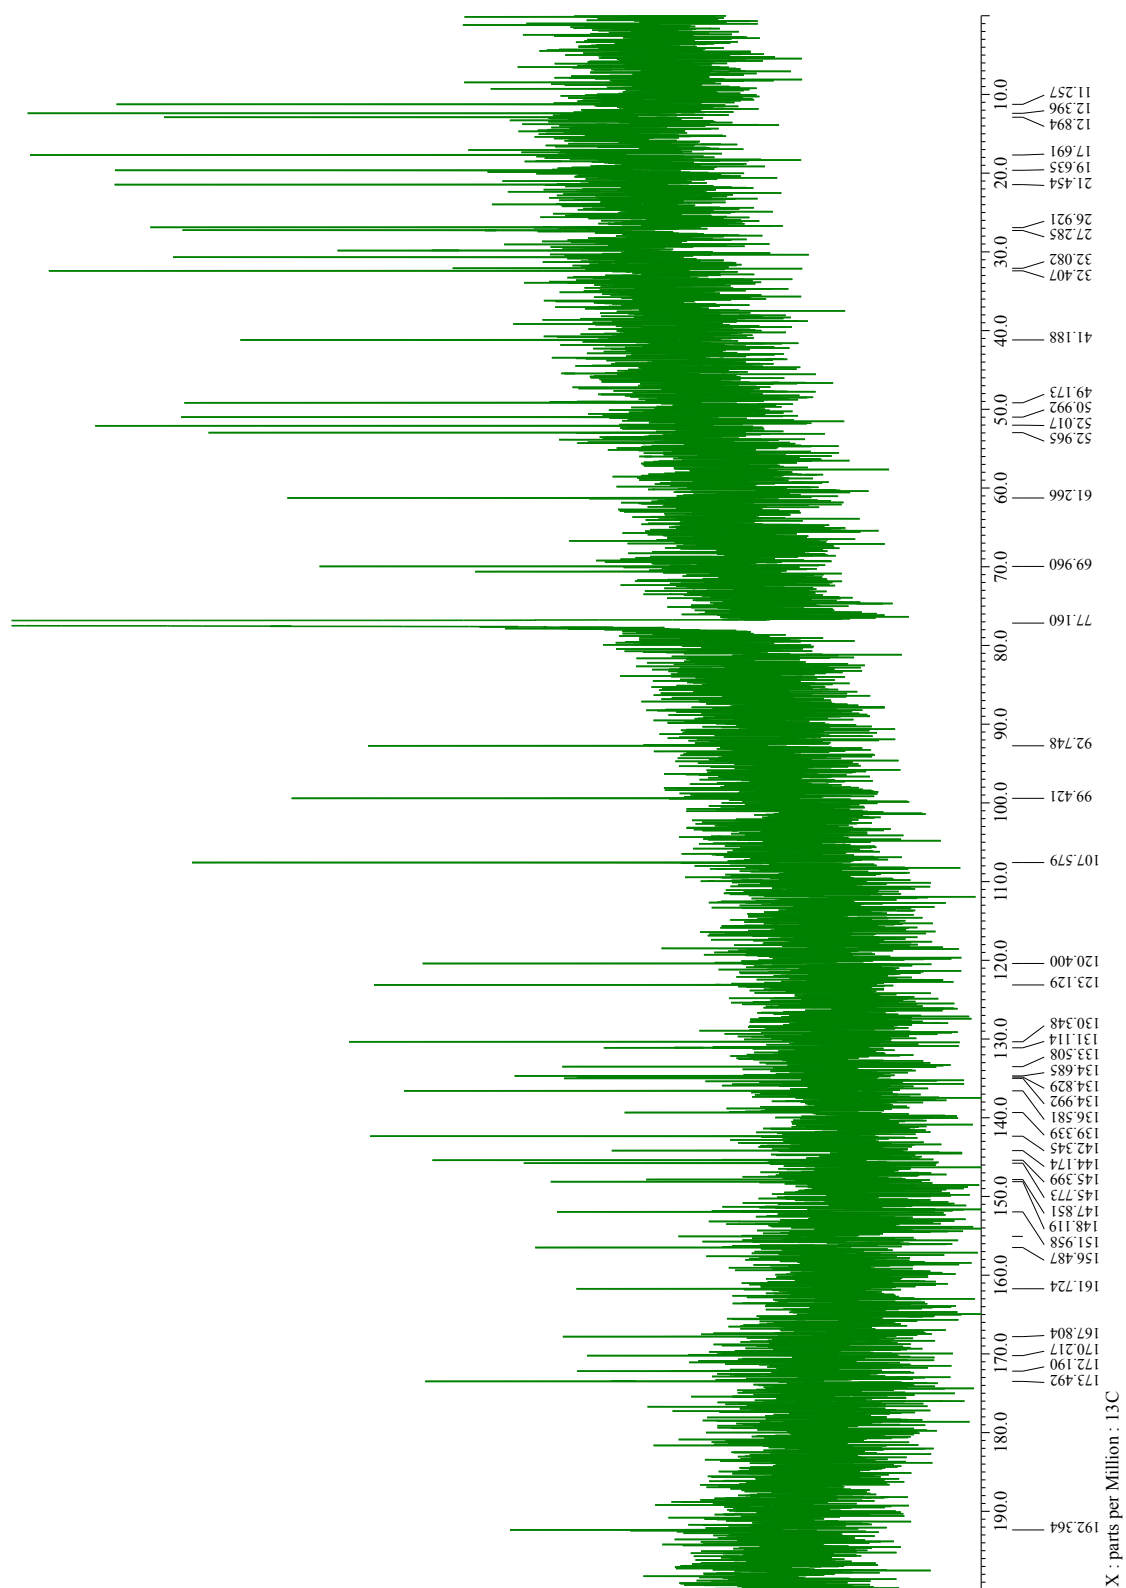

**Figure S8.**  $^{13}\text{C}$  NMR (151 MHz) spectrum of zinc methyl 13<sup>2</sup>-[3-(3-pyridyl)propyl]oxycarbonylmethyl]pheophorbide-*a* [**Zn-4(C<sub>1,3</sub>)**] in  $\text{CDCl}_3$ .



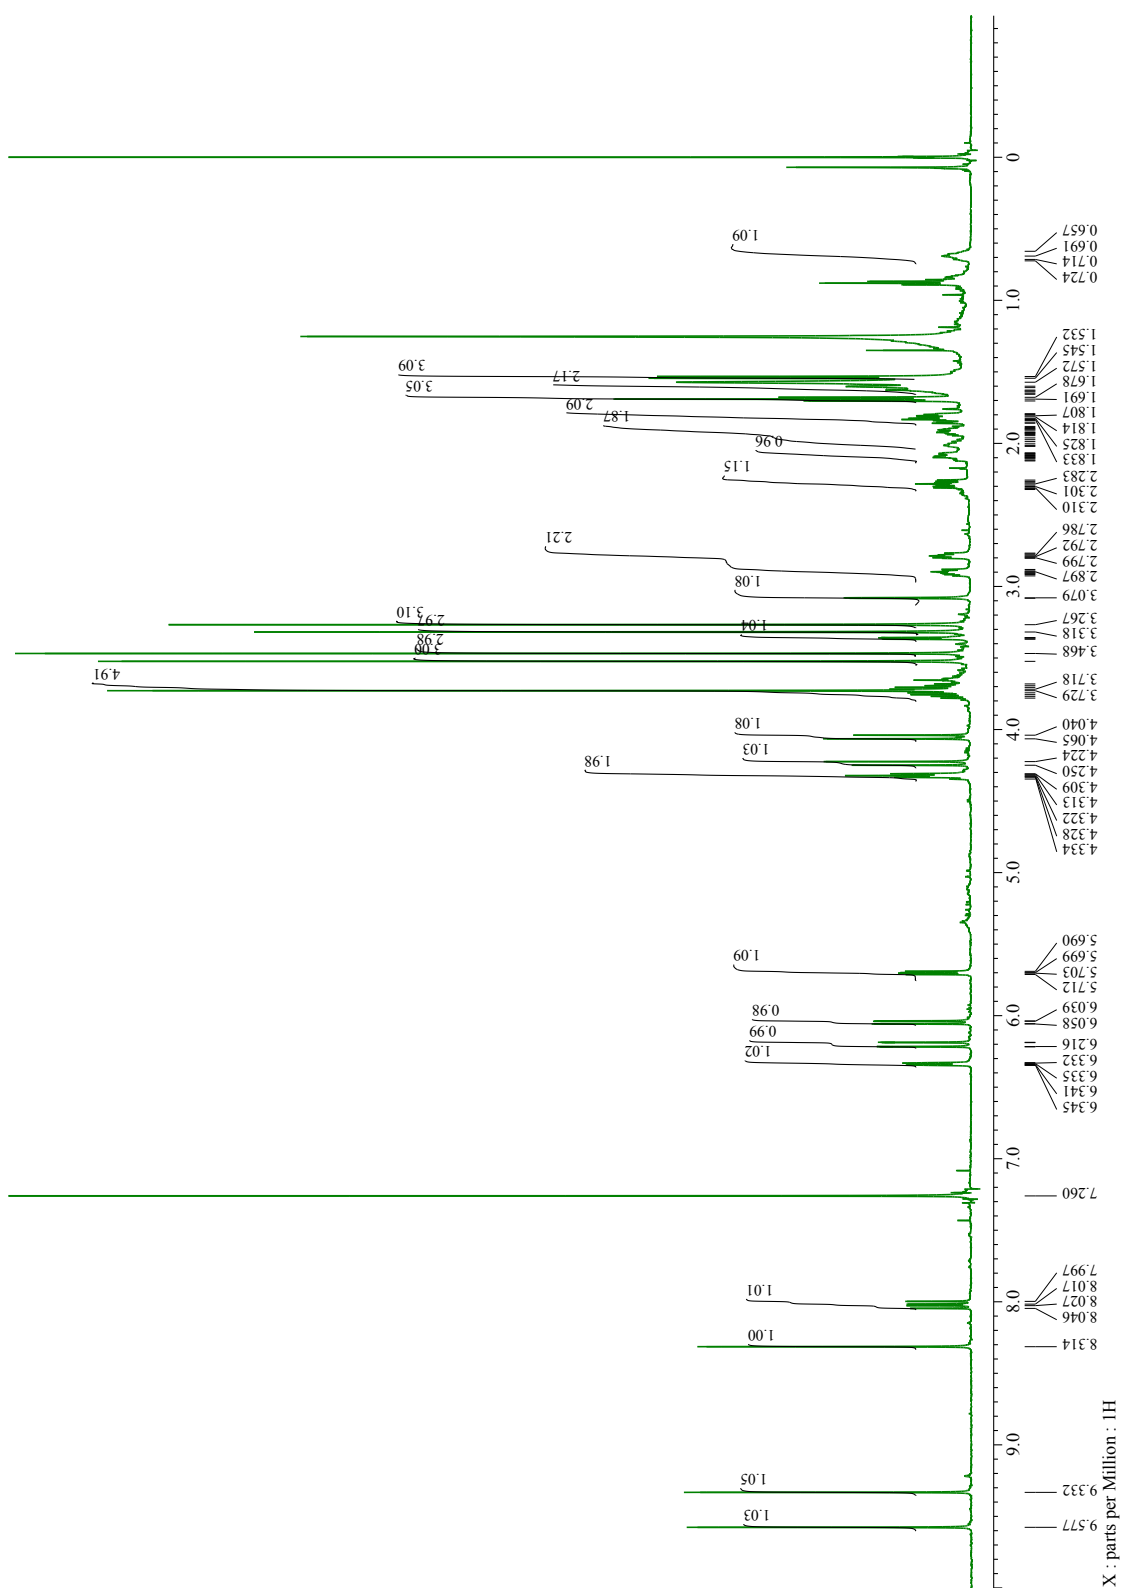

**Figure S9.** <sup>1</sup>H NMR (600 MHz) spectrum of zinc methyl 132-[3-(3-pyridyl)propyl]oxycarbonylmethyl]pheophorbide-*a'* [Zn-4'(C<sub>1,3</sub>)] in CDCl<sub>3</sub>.

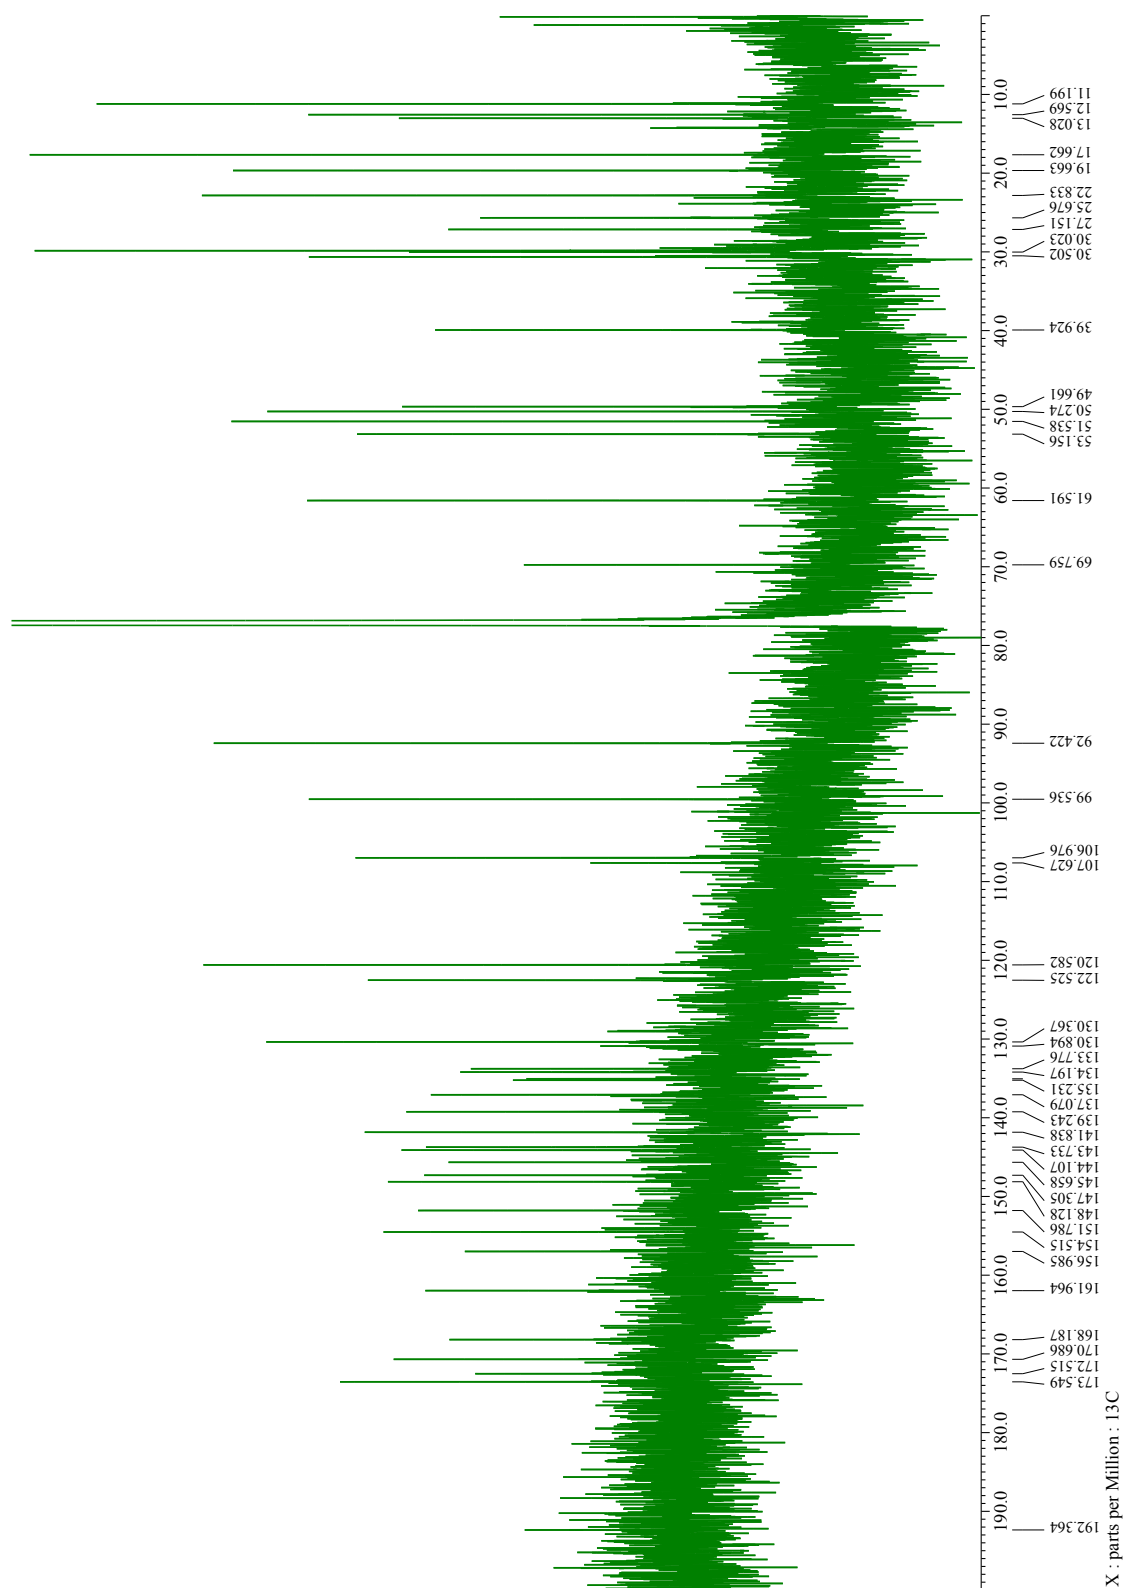

**Figure S10.**  $^{13}\text{C}$  NMR (151 MHz) spectrum of zinc methyl  $13^2$ -[3-(3-pyridyl)propyl]-oxycarbonylmethyl]pheophorbide-*a'* [**Zn-4'**( $\text{C}_{1,3}$ )] in  $\text{CDCl}_3$ .

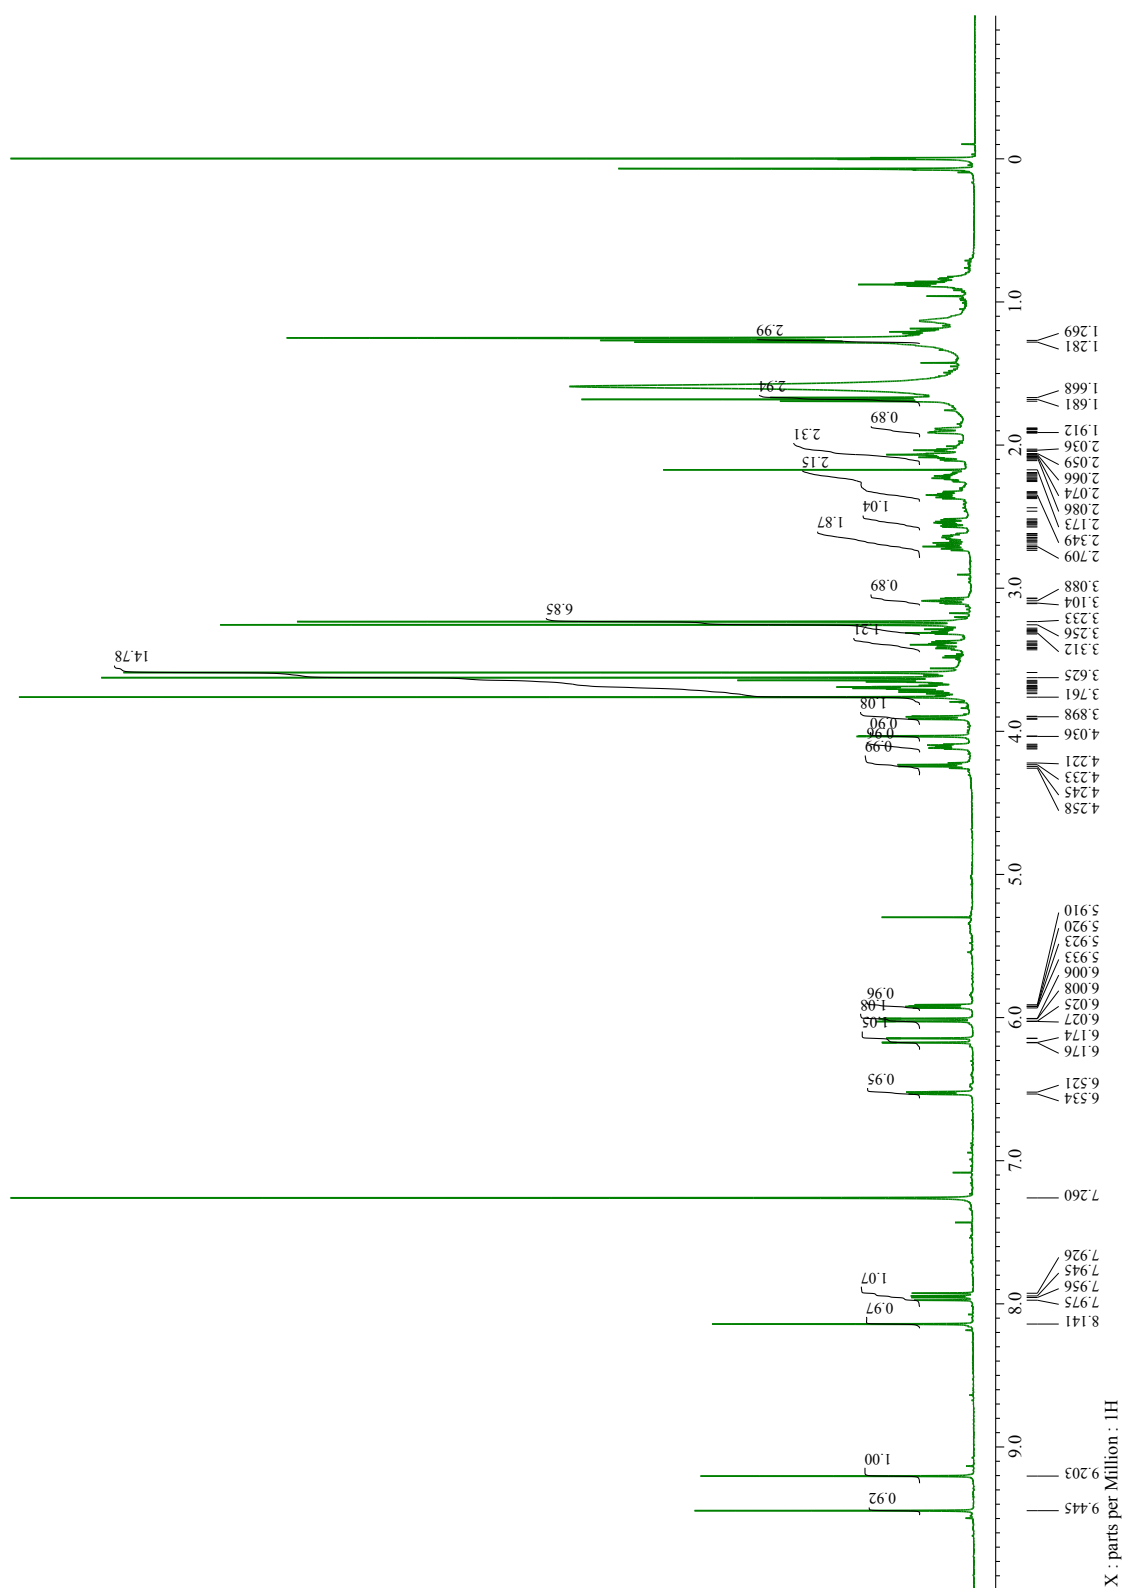

**Figure S11.** <sup>1</sup>H NMR (600 MHz) spectrum of zinc methyl 132-(2-[[2-(3-pyridyl)ethyl]-oxycarbonyl]ethyl)phoeophorbide-*a* [**Zn-4(C<sub>2,2</sub>)**] in CDCl<sub>3</sub>.

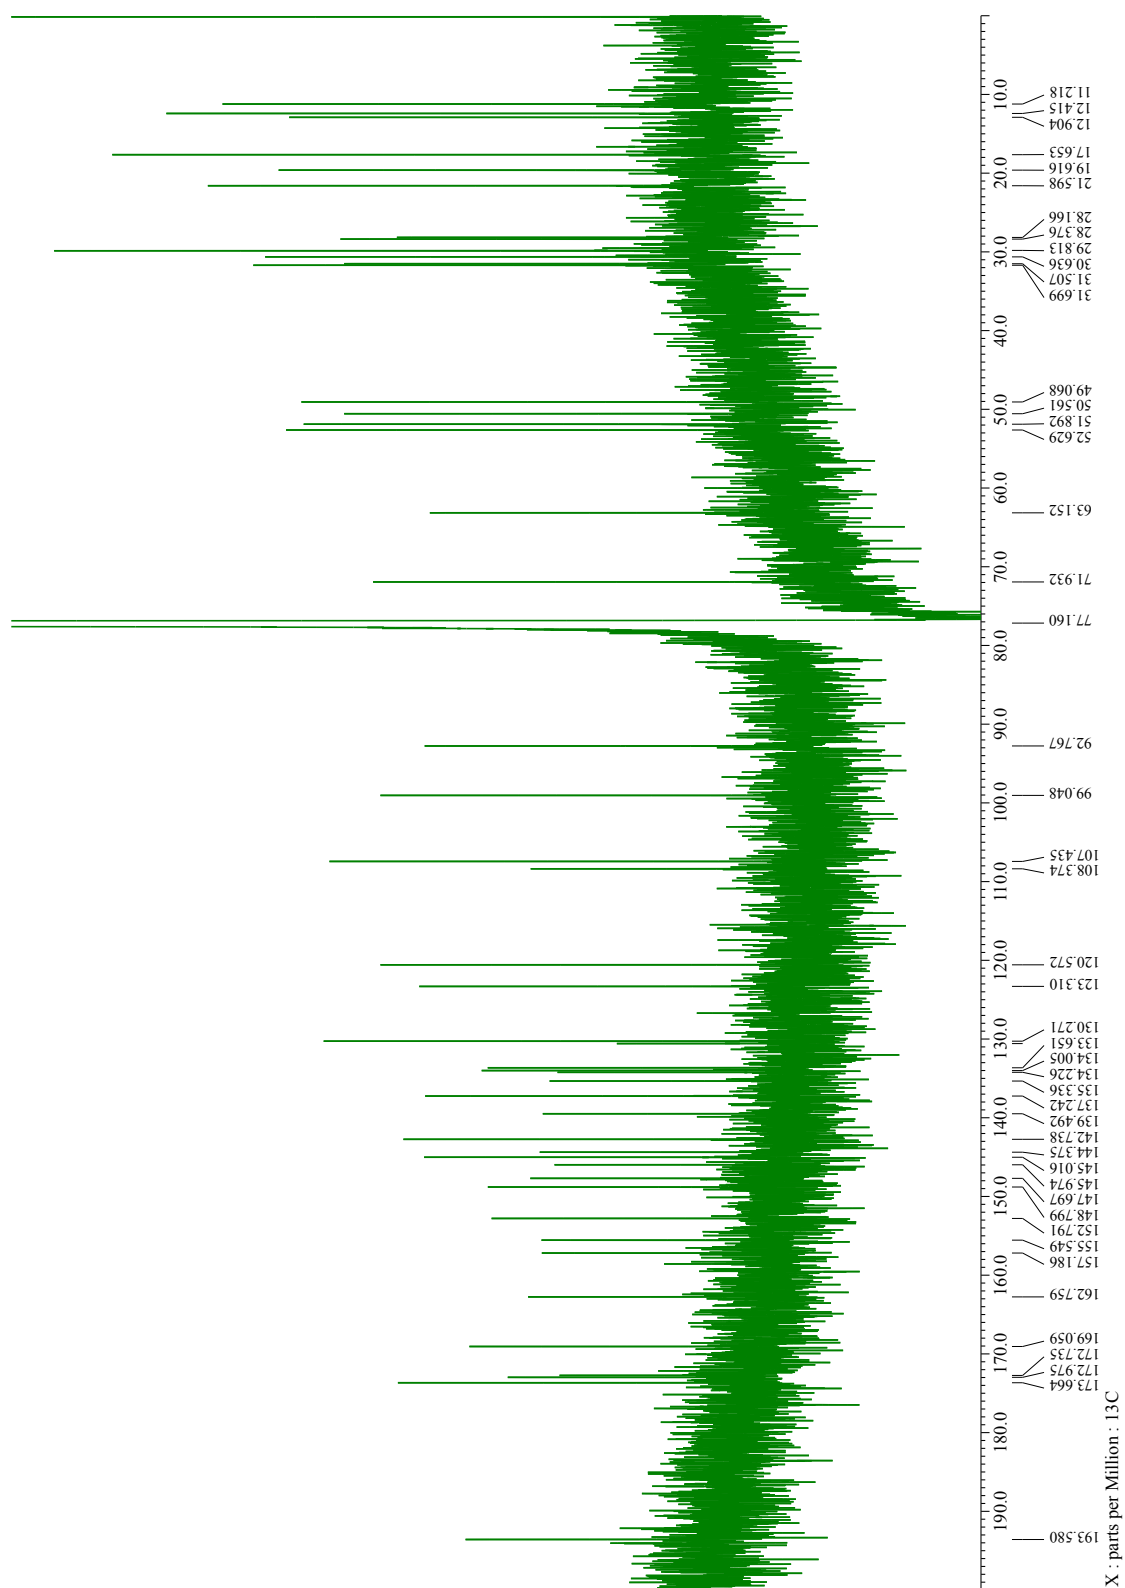

**Figure S12.**  $^{13}\text{C}$  NMR (151 MHz) spectrum of zinc methyl  $13^2$ -(2-{{2-(3-pyridyl)ethyl}}-oxycarbonyl)ethyl)pheophorbide-*a* [**Zn-4**( $\text{C}_{2,2}$ )] in  $\text{CDCl}_3$ .

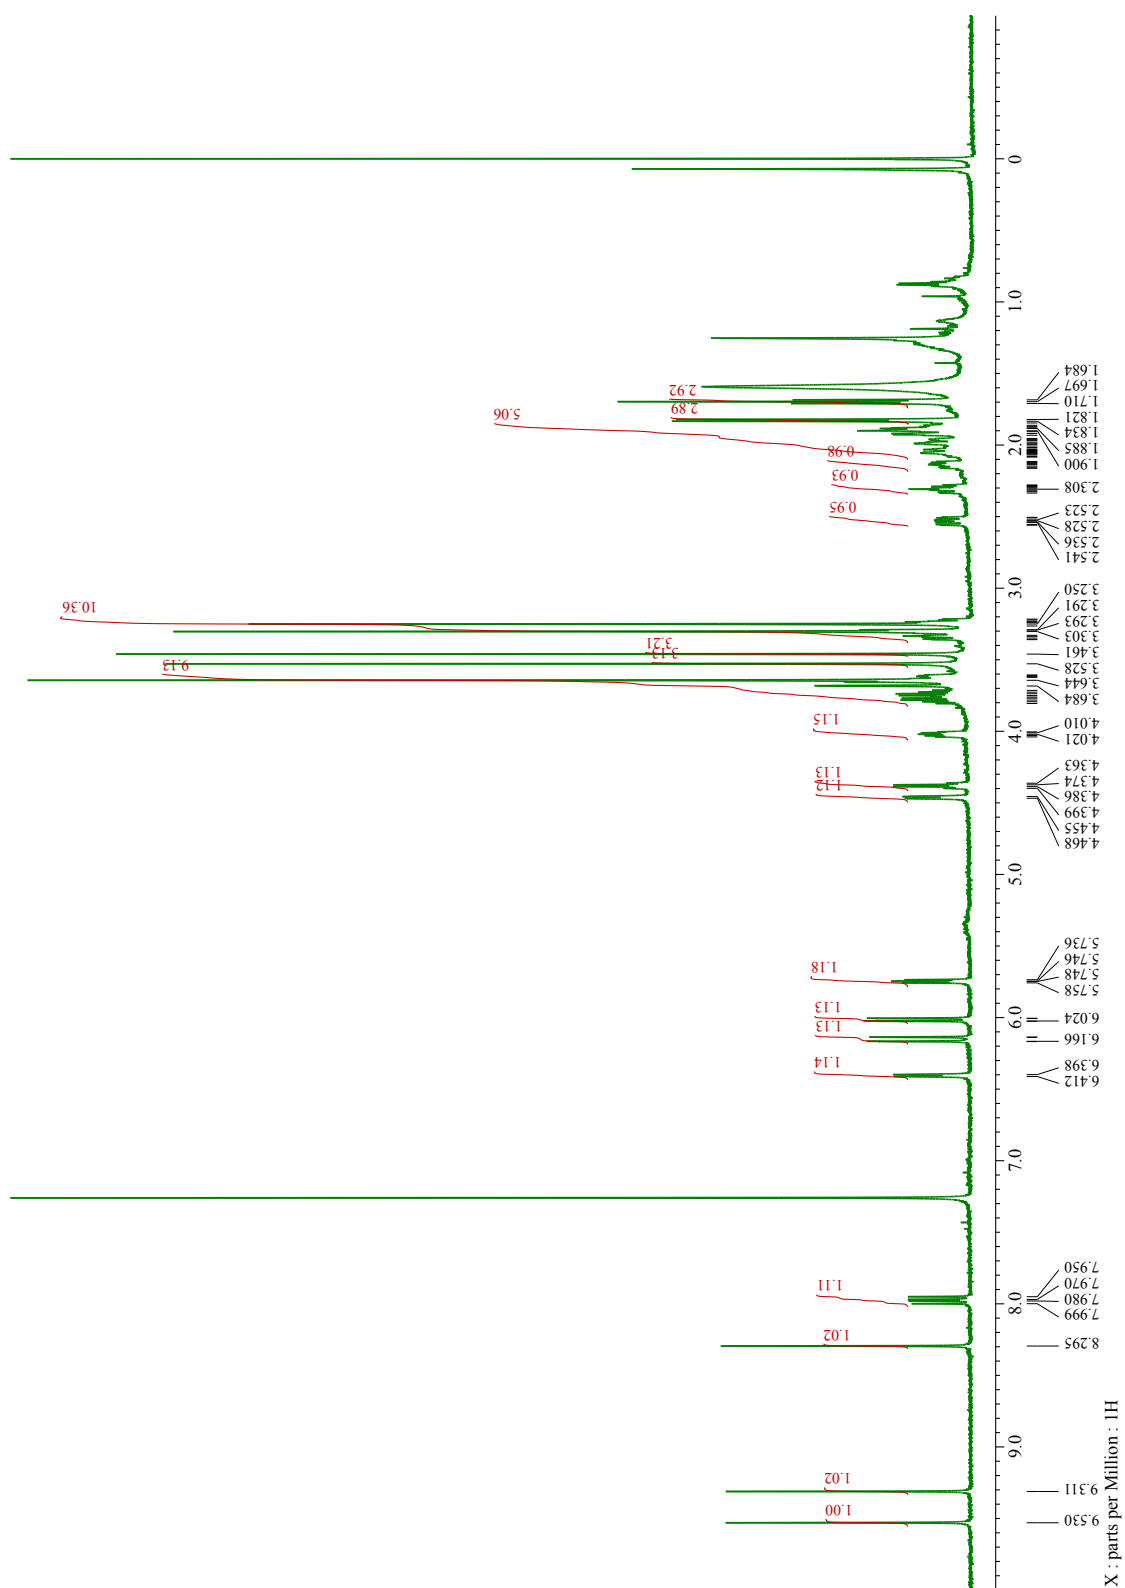

**Figure S13.** <sup>1</sup>H NMR (600 MHz) spectrum of zinc methyl 13<sup>2</sup>-(2-[[2-(3-pyridyl)ethyl]-oxycarbonyl]ethyl)phosphoribide-*a'* [**Zn-4'**(C<sub>2,2</sub>)] in CDCl<sub>3</sub>.

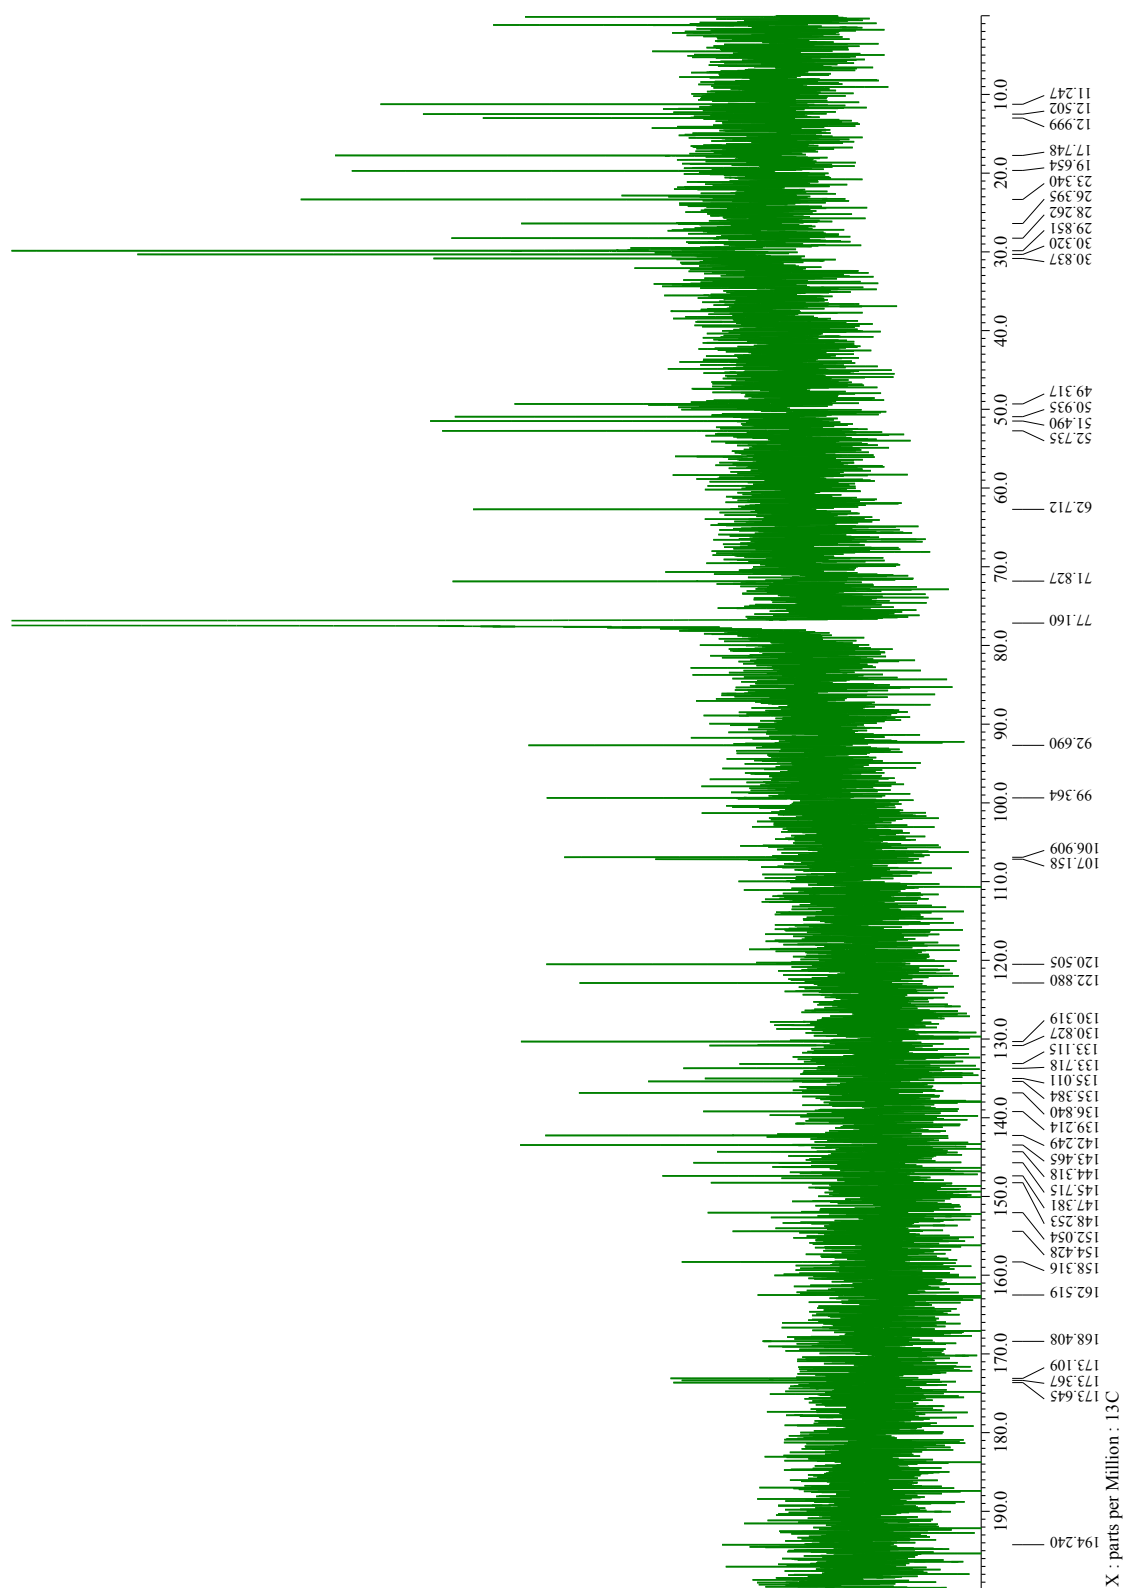

**Figure S14.**  $^{13}\text{C}$  NMR (151 MHz) spectrum of zinc methyl  $13^2$ -(2-{{2-(3-pyridyl)ethyl}}-oxycarbonyl]ethyl)pheophorbide-*a'* [**Zn-4'**( $\text{C}_{2,2}$ )] in  $\text{CDCl}_3$ .

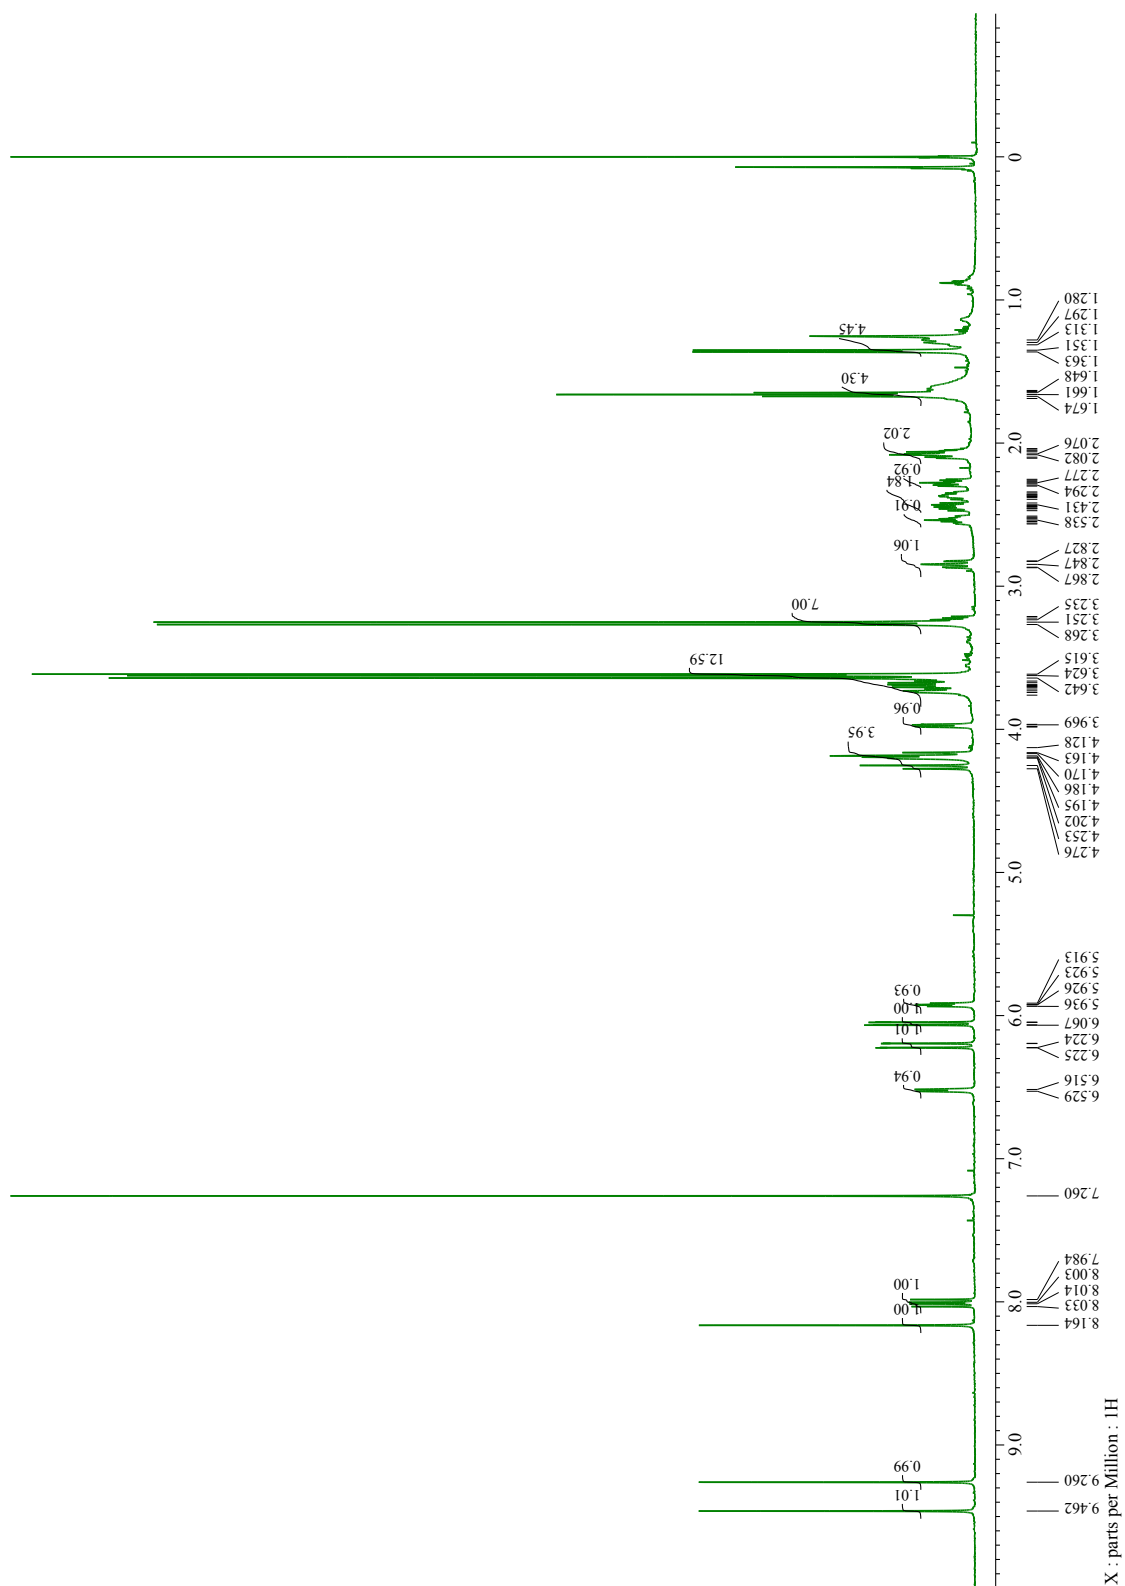

**Figure S15.** <sup>1</sup>H NMR (600 MHz) spectrum of zinc methyl 132-[3-((3-pyridyl)methoxy-carbonyl)propyl]pheophorbide-a [Zn-4(C<sub>3,1</sub>)] in CDCl<sub>3</sub>.

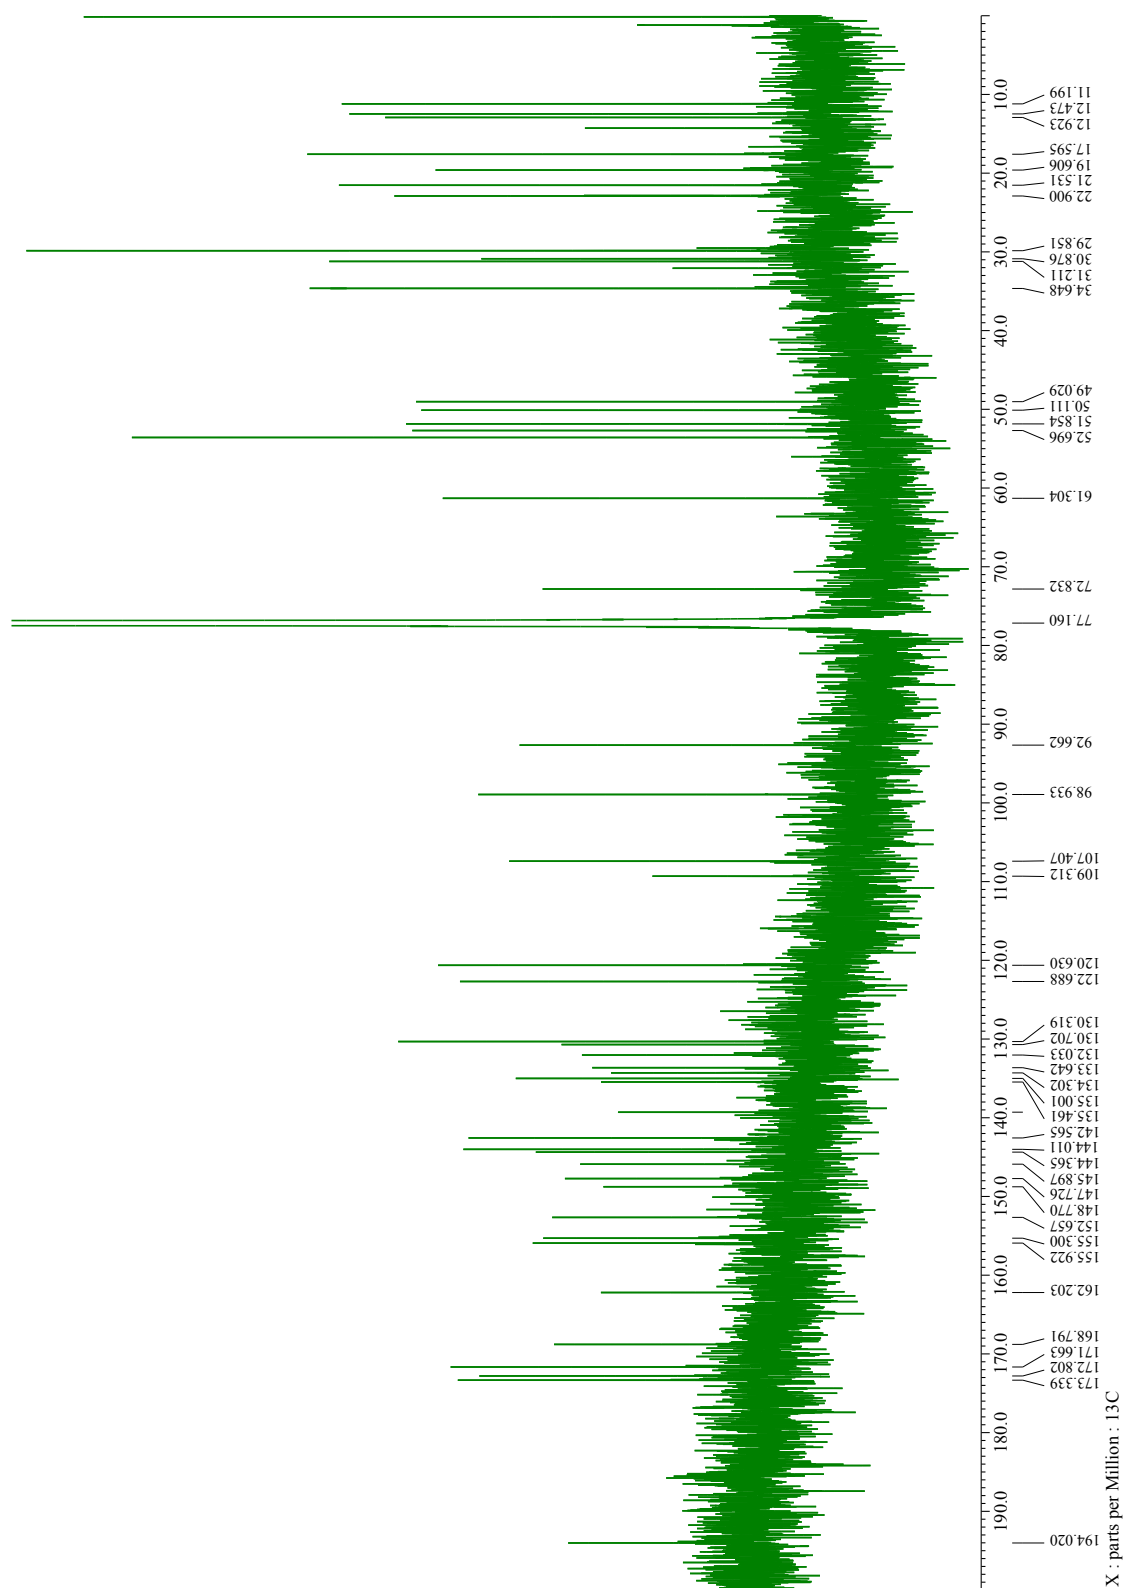

**Figure S16.**  $^{13}\text{C}$  NMR (151 MHz) spectrum of zinc methyl  $13^2$ -[3-((3-pyridyl)methyl-oxycarbonyl)propyl]pheophorbide-*a* [**Zn-4(C<sub>3,1</sub>)**] in  $\text{CDCl}_3$ .



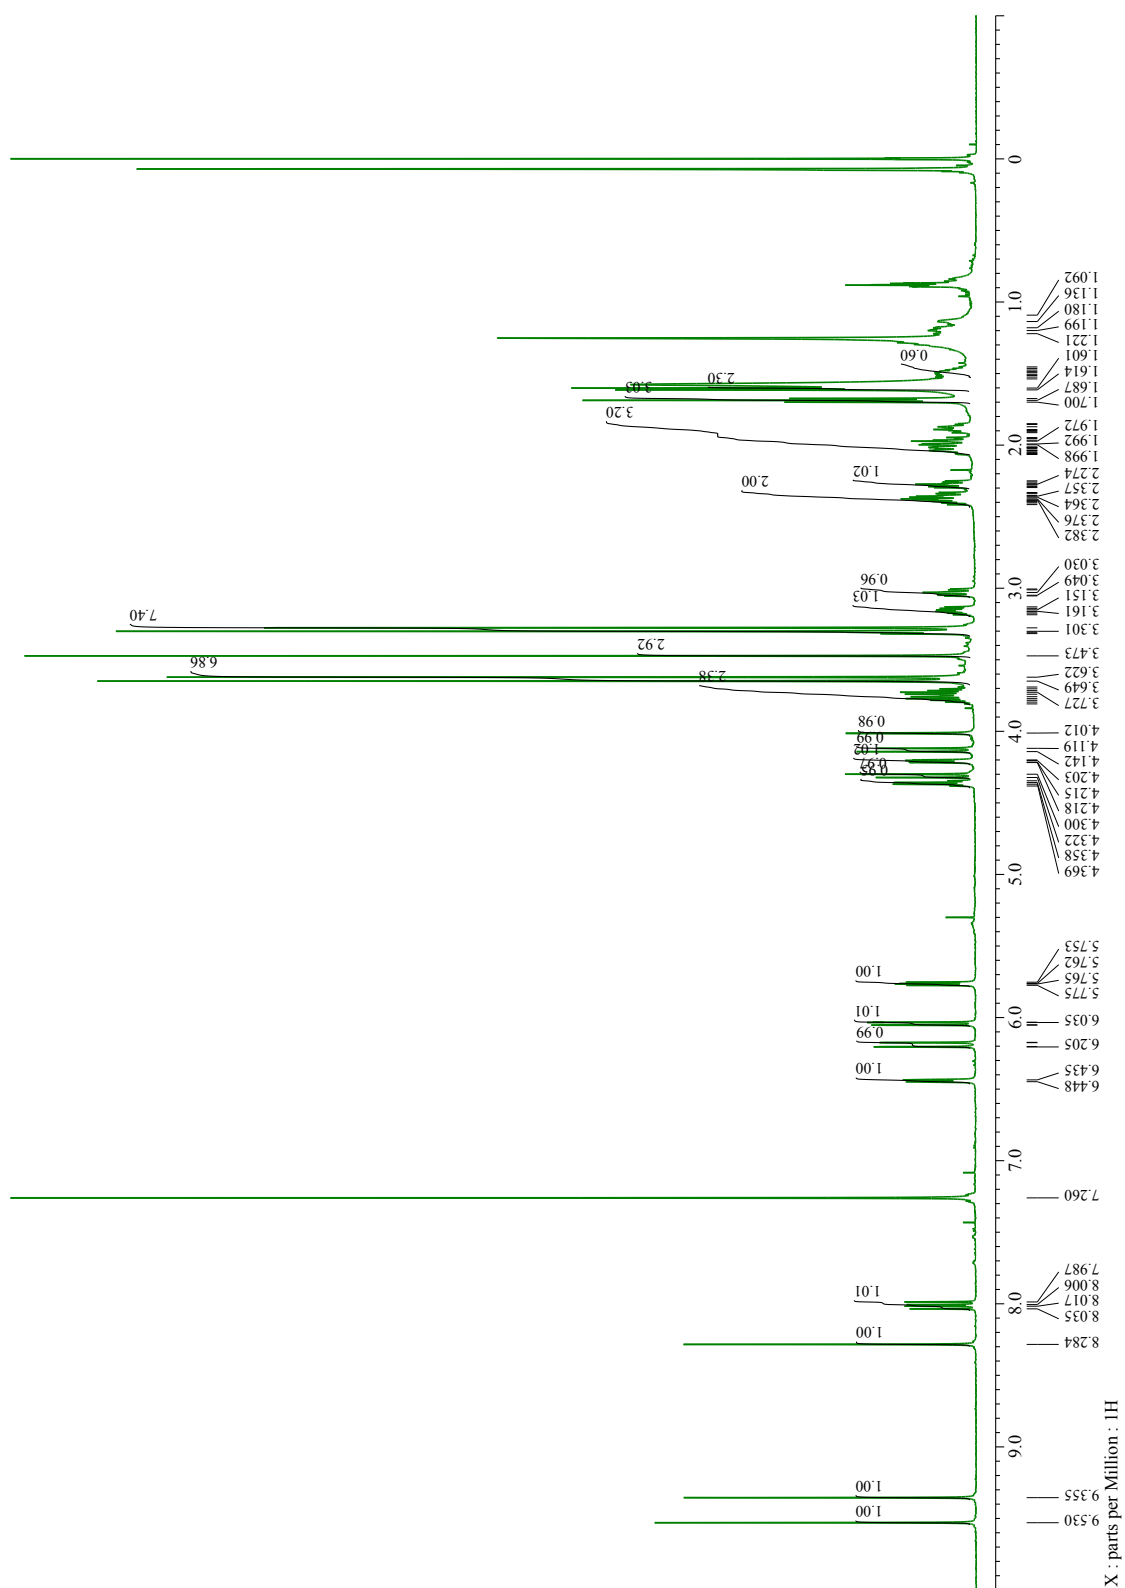

**Figure S17.** <sup>1</sup>H NMR (600 MHz) spectrum of zinc methyl 13<sup>2</sup>-[3-((3-pyridyl)methyl)oxycarbonyl]propyl]pheophorbide-*a'* [**Zn-4'**(C<sub>3,1</sub>)] in CDCl<sub>3</sub>.

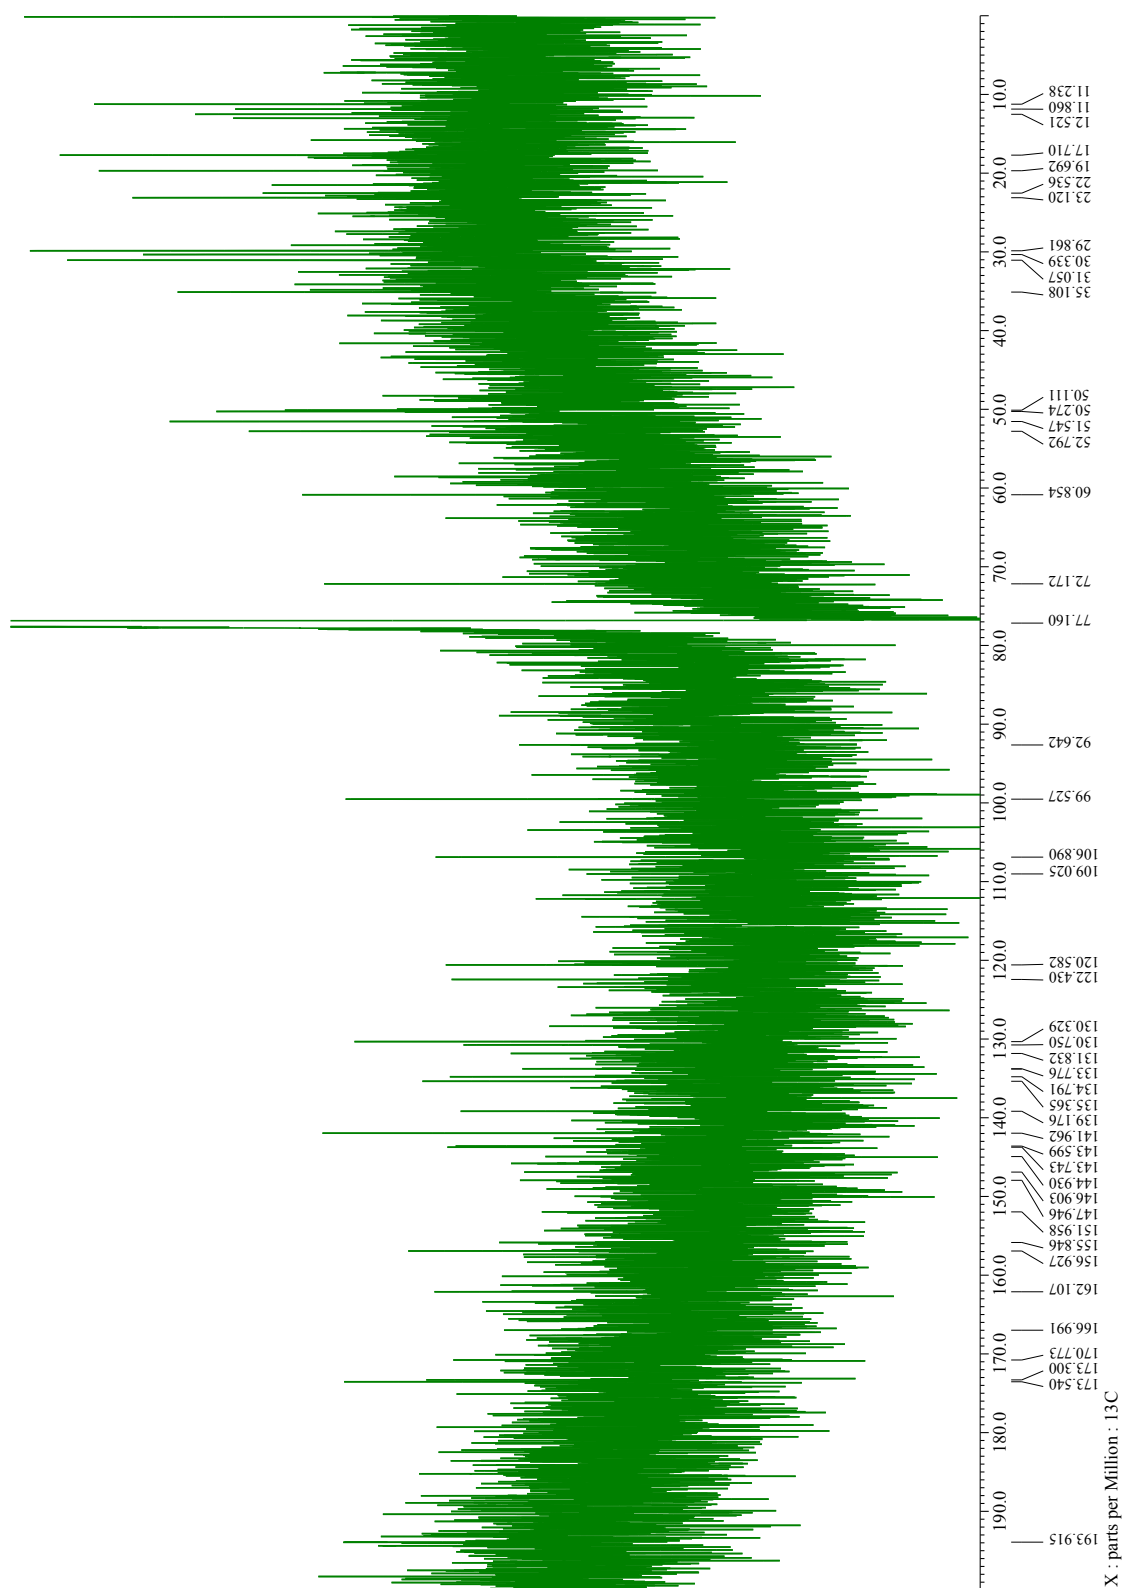

**Figure S18.**  $^{13}\text{C}$  NMR (151 MHz) spectrum of zinc methyl 132-[3-((3-pyridyl)methyl-oxycarbonyl)propyl]pheophorbide-*a'* [**Zn-4'**( $\text{C}_{3,1}$ )] in  $\text{CDCl}_3$ .

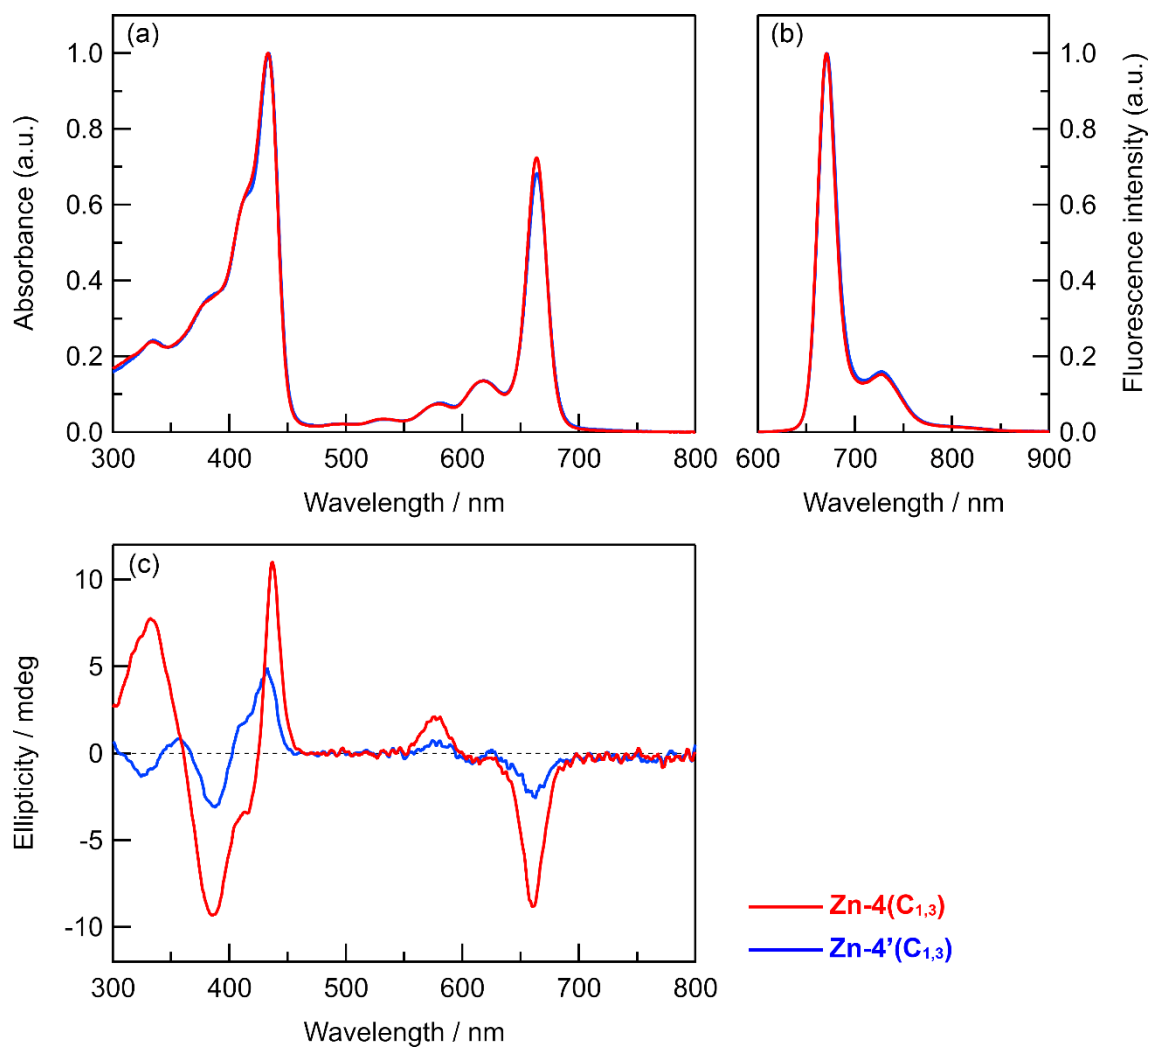

**Fig. S19** (a) UV-visible absorption, (b) fluorescence emission (excited at Soret maxima), and (c) CD spectra of **Zn-4(C<sub>1,3</sub>)** (red line) and **Zn-4'(C<sub>1,3</sub>)** (blue line) in aerated CHCl<sub>3</sub> at rt; visible spectra were normalized at Soret maxima and fluorescence spectra were normalized at intense maxima.

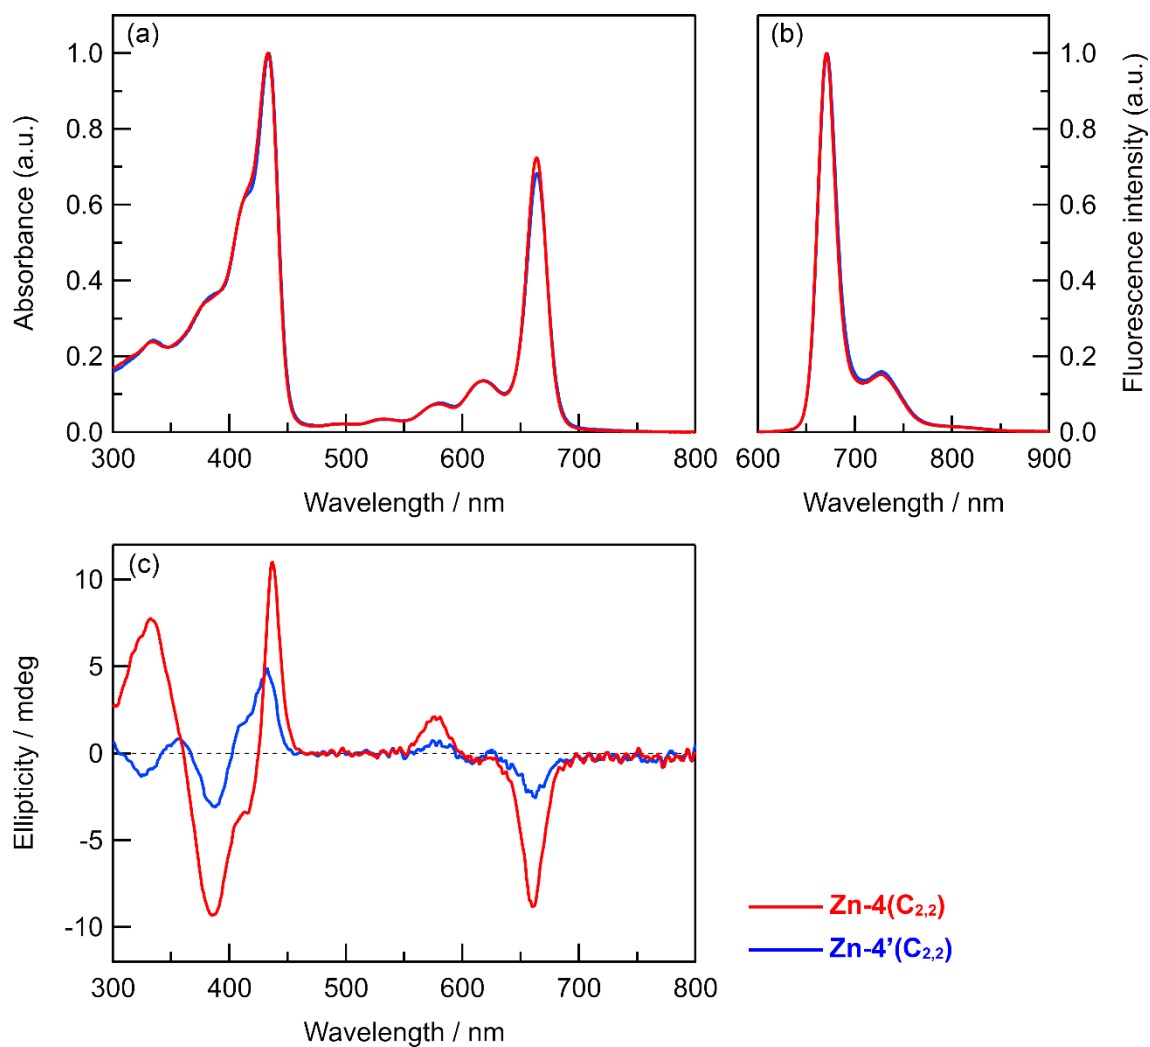

**Fig. S20** (a) UV-visible absorption, (b) fluorescence emission (excited at Soret maxima), and (c) CD spectra of **Zn-4(C<sub>2,2</sub>)** (red line) and **Zn-4'(C<sub>2,2</sub>)** (blue line) in aerated CHCl<sub>3</sub> at rt; visible spectra were normalized at Soret maxima and fluorescence spectra were normalized at intense maxima.
